# Supplementary material for: Alterations to the Lung Microbiome in Idiopathic Pulmonary Fibrosis Patients
Source: Front Cell Infect Microbiol. 2019 May 21;9:149. doi: 10.3389/fcimb.2019.00149 (PMC6536613; doi:10.3389/fcimb.2019.00149)
Supplement: Supplementary Table 4 — EggNOG functional enrichment analysis. [file Table_4.XLSX]

## Sheet: Sheet1
Pro	hit_def	hit_name	bits	expect	percent_identities	Function	Groups
balf_cluster_gene_150948_1	1037409.BJ6T_75980	gnl|BL_ORD_ID|8426388 1037409.BJ6T_75980	695.271	0	85.71	(ABC) transporter	E
balf_cluster_gene_183293_1	392499.Swit_3802	gnl|BL_ORD_ID|3862365 392499.Swit_3802	424.476	4.55531e-145	59.56	Glycosyl transferase (Group 1	M
balf_cluster_gene_107739_1	944547.ABLL_0806	gnl|BL_ORD_ID|2027809 944547.ABLL_0806	600.127	0	72.47	polysaccharide biosynthesis protein	M
balf_cluster_gene_155146_1	765698.Mesci_4961	gnl|BL_ORD_ID|2842255 765698.Mesci_4961	147.517	6.00595e-36	23.21	biosynthesis protein	M
balf_cluster_gene_143223_1	661410.METDI4540	gnl|BL_ORD_ID|11638529 661410.METDI4540	440.654	8.80075e-154	69.18
balf_cluster_gene_076478_1	997353.HMPREF9144_0460	gnl|BL_ORD_ID|8557879 997353.HMPREF9144_0460	842.032	0	99.76	Transcription elongation factor NusA	K
balf_cluster_gene_206244_1	525264.HMPREF0305_10192	gnl|BL_ORD_ID|9492919 525264.HMPREF0305_10192	368.237	2.43896e-123	49.25	peptidase M24	E
balf_cluster_gene_126994_1	428406.Rpic12D_0571	gnl|BL_ORD_ID|13820071 428406.Rpic12D_0571	835.484	0	95.77
balf_cluster_gene_036046_1	546266.NEIMUCOT_05722	gnl|BL_ORD_ID|2484753 546266.NEIMUCOT_05722	707.212	0	100	Histidine kinase	T
balf_cluster_gene_154004_1	709797.CSIRO_3913	gnl|BL_ORD_ID|7183268 709797.CSIRO_3913	578.556	0	74.8	formyltetrahydrofolate deformylase	F
balf_cluster_gene_120167_1	562971.HMPREF0005_02347	gnl|BL_ORD_ID|13844427 562971.HMPREF0005_02347	658.677	0	99.71
balf_cluster_gene_158098_1	857572.E9Y_06659	gnl|BL_ORD_ID|12833508 857572.E9Y_06659	572.778	0	74.3
balf_cluster_gene_043994_1	910312.HMPREF9294_0226	gnl|BL_ORD_ID|11594786 910312.HMPREF9294_0226	304.679	2.35007e-98	41.83
balf_cluster_gene_099234_1	435832.HMPREF0604_01766	gnl|BL_ORD_ID|8432876 435832.HMPREF0604_01766	677.167	0	99.7	type IV pilus assembly protein pilm	N:U
balf_cluster_gene_048580_1	347253.SALIVA_1489	gnl|BL_ORD_ID|14145662 347253.SALIVA_1489	793.497	0	99.73
balf_cluster_gene_187583_1	997348.HMPREF9418_1510	gnl|BL_ORD_ID|10895165 997348.HMPREF9418_1510	649.818	0	95.82
balf_cluster_gene_007838_1	997348.HMPREF9418_2479	gnl|BL_ORD_ID|10896337 997348.HMPREF9418_2479	702.975	0	100
balf_cluster_gene_063800_1	661410.METDI5792	gnl|BL_ORD_ID|11639739 661410.METDI5792	619.387	0	92.31
balf_cluster_gene_102273_1	562971.HMPREF0005_00953	gnl|BL_ORD_ID|13844761 562971.HMPREF0005_00953	665.226	0	94.56
balf_cluster_gene_108717_1	435832.HMPREF0604_00817	gnl|BL_ORD_ID|8433798 435832.HMPREF0604_00817	810.061	0	97.73	This protein is involved in the repair of mismatches in DNA. It is required for dam-dependent methyl-directed DNA mismatch repair. May act as a molecular matchmaker , a protein that promotes the formation of a stable complex between two or more DNA-binding proteins in an ATP-dependent manner without itself being part of a final effector complex (By similarity)	L
balf_cluster_gene_071048_1	751586.BDIM_29520	gnl|BL_ORD_ID|2557080 751586.BDIM_29520	553.903	0	83.24	Key enzyme in the regulation of glycerol uptake and metabolism (By similarity)	C
balf_cluster_gene_204465_1	411466.ACTODO_01571	gnl|BL_ORD_ID|1771243 411466.ACTODO_01571	704.131	0	96.1
balf_cluster_gene_087121_1	715226.ABI_23950	gnl|BL_ORD_ID|6579146 715226.ABI_23950	472.626	4.27938e-165	64.21	NA	S
balf_cluster_gene_203430_1	679190.HMPREF0650_1427	gnl|BL_ORD_ID|2660908 679190.HMPREF0650_1427	350.517	9.31109e-119	45.45	Restriction modification system DNA (Specificity	V
balf_cluster_gene_043034_1	224911.blr7254	gnl|BL_ORD_ID|7500487 224911.blr7254	472.626	6.46254e-166	75.58	UPF0283 membrane protein	S
balf_cluster_gene_129127_1	234267.Acid_3351	gnl|BL_ORD_ID|8520931 234267.Acid_3351	267.7	1.88257e-85	40	synthase	H
balf_cluster_gene_005954_1	1037409.BJ6T_28240	gnl|BL_ORD_ID|8419328 1037409.BJ6T_28240	619.772	0	85.42	Cell Division Protein	D
balf_cluster_gene_164354_1	879309.HMPREF9199_0610	gnl|BL_ORD_ID|1836682 879309.HMPREF9199_0610	664.07	0	97.62	Hydrogenase expression formation protein HypE	O
balf_cluster_gene_052592_1	997830.HMPREF1124_0248	gnl|BL_ORD_ID|4483316 997830.HMPREF1124_0248	821.231	0	98.77	Catalyzes the ATP-dependent transfer of a sulfur to tRNA to produce 4-thiouridine in position 8 of tRNAs, which functions as a near-UV photosensor. Also catalyzes the transfer of sulfur to the sulfur carrier protein ThiS, forming ThiS-thiocarboxylate. This is a step in the synthesis of thiazole, in the thiamine biosynthesis pathway. The sulfur is donated as persulfide by IscS (By similarity)	H
balf_cluster_gene_130786_1	203275.BFO_1325	gnl|BL_ORD_ID|9405106 203275.BFO_1325	594.734	0	74.47	gliding motility-associated protein gldm	S
balf_cluster_gene_014573_1	649742.HMPREF0970_01949	gnl|BL_ORD_ID|14221158 649742.HMPREF0970_01949	667.922	0	94.03
balf_cluster_gene_210973_1	523794.Lebu_0541	gnl|BL_ORD_ID|977072 523794.Lebu_0541	590.112	0	85.93	Dehydrogenase	C
balf_cluster_gene_172551_1	562981.HMPREF0428_01430	gnl|BL_ORD_ID|931613 562981.HMPREF0428_01430	606.675	0	94.7	ybbr family	S
balf_cluster_gene_088167_1	509169.xccb100_3759	gnl|BL_ORD_ID|11442394 509169.xccb100_3759	563.918	0	82.42
balf_cluster_gene_177197_1	679193.HMPREF9205_0392	gnl|BL_ORD_ID|13208140 679193.HMPREF9205_0392	640.188	0	99.39
balf_cluster_gene_152700_1	700598.Niako_5484	gnl|BL_ORD_ID|8359006 700598.Niako_5484	514.612	0	65.49	dinuclear metal center protein, YbgI	S
balf_cluster_gene_114356_1	563038.HMPREF0851_01695	gnl|BL_ORD_ID|6312699 563038.HMPREF0851_01695	696.427	0	98.54	transcriptioN-repair coupling factor	L
balf_cluster_gene_044673_1	888828.HMPREF9417_1818	gnl|BL_ORD_ID|10731216 888828.HMPREF9417_1818	686.026	0	98.83
balf_cluster_gene_026550_1	649742.HMPREF0970_01795	gnl|BL_ORD_ID|14220028 649742.HMPREF0970_01795	705.671	0	97.74
balf_cluster_gene_198502_1	411486.CLOM621_09107	gnl|BL_ORD_ID|11129130 411486.CLOM621_09107	241.121	2.47225e-73	36.91
balf_cluster_gene_197008_1	290340.AAur_2951	gnl|BL_ORD_ID|4432639 290340.AAur_2951	65.4698	4.65311e-09	13.71
balf_cluster_gene_156903_1	562971.HMPREF0005_01585	gnl|BL_ORD_ID|13843073 562971.HMPREF0005_01585	613.609	0	97.82
balf_cluster_gene_020105_1	640512.BC1003_1329	gnl|BL_ORD_ID|6206543 640512.BC1003_1329	409.068	4.48982e-141	49.6	Alpha beta hydrolase	S
balf_cluster_gene_103410_1	857087.Metme_2050	gnl|BL_ORD_ID|4077534 857087.Metme_2050	120.939	4.23845e-28	30.65	Archaeal ATPase	S
balf_cluster_gene_222702_1	857581.E9G_02333	gnl|BL_ORD_ID|12139337 857581.E9G_02333	823.543	0	99
balf_cluster_gene_094907_1	1007104.SUS17_2894	gnl|BL_ORD_ID|1297829 1007104.SUS17_2894	536.954	0	70.42	Responsible for the addition of glutamate residues to the C-terminus of ribosomal protein S6 (By similarity)	H:J
balf_cluster_gene_144378_1	706433.HMPREF9430_01419	gnl|BL_ORD_ID|2354736 706433.HMPREF9430_01419	667.537	0	94.66	PhosPhorylase	S
balf_cluster_gene_074365_1	546268.NEISUBOT_04064	gnl|BL_ORD_ID|3026230 546268.NEISUBOT_04064	799.66	0	96.6	major facilitator Superfamily	G
balf_cluster_gene_011745_1	411466.ACTODO_00564	gnl|BL_ORD_ID|1771133 411466.ACTODO_00564	80.4925	9.25314e-14	20.7	domain protein	S
balf_cluster_gene_099160_1	596309.RHOER0001_0062	gnl|BL_ORD_ID|9819826 596309.RHOER0001_0062	734.947	0	99.18
balf_cluster_gene_186870_1	866778.HMPREF9684_0513	gnl|BL_ORD_ID|11625108 866778.HMPREF9684_0513	723.005	0	96.37
balf_cluster_gene_192198_1	879309.HMPREF9199_1345	gnl|BL_ORD_ID|1835621 879309.HMPREF9199_1345	657.907	0	95.78	Transfers a GMP moiety from GTP to Mo-molybdopterin (Mo- MPT) cofactor (Moco or molybdenum cofactor) to form Mo- molybdopterin guanine dinucleotide (Mo-MGD) cofactor (By similarity)	H
balf_cluster_gene_162444_1	680646.RMDY18_18340	gnl|BL_ORD_ID|6600254 680646.RMDY18_18340	863.988	0	99.05	Catalyzes the conversion of acetate into acetyl-CoA (AcCoA), an essential intermediate at the junction of anabolic and catabolic pathways. AcsA undergoes a two-step reaction. In the first half reaction, AcsA combines acetate with ATP to form acetyl-adenylate (AcAMP) intermediate. In the second half reaction, it can then transfer the acetyl group from AcAMP to the sulfhydryl group of CoA, forming …	I
balf_cluster_gene_228778_1	706436.HMPREF9074_03382	gnl|BL_ORD_ID|4306046 706436.HMPREF9074_03382	656.366	0	98.16	Involved in DNA double-strand break repair (DSBR). The Rad50 Mre11 complex possesses single-strand endonuclease activity and ATP-dependent double-strand-specific 3'-5' exonuclease activity. Rad50 provides an ATP-dependent control of Mre11 by unwinding and or repositioning DNA ends into the Mre11 active site (By similarity)	L
balf_cluster_gene_079541_1	856793.MICA_1260	gnl|BL_ORD_ID|4051526 856793.MICA_1260	480.33	3.08544e-166	58.39
balf_cluster_gene_048756_1	1048332.SALIVB_0570	gnl|BL_ORD_ID|11804640 1048332.SALIVB_0570	744.191	0	99.72
balf_cluster_gene_119290_1	445970.ALIPUT_02009	gnl|BL_ORD_ID|7048444 445970.ALIPUT_02009	193.741	3.86259e-55	28.99	(ABC) transporter	V
balf_cluster_gene_130445_1	1037409.BJ6T_02270	gnl|BL_ORD_ID|8425154 1037409.BJ6T_02270	770	0	91.87	Aspartokinase	E
balf_cluster_gene_094342_1	411466.ACTODO_02023	gnl|BL_ORD_ID|1772319 411466.ACTODO_02023	707.983	0	96.83	Involved in chromosome	S
balf_cluster_gene_218188_1	350701.BDAG_03392	gnl|BL_ORD_ID|2575014 350701.BDAG_03392	387.882	6.2483e-133	59.27	Threonine dehydratase	E
balf_cluster_gene_023990_1	562971.HMPREF0005_00743	gnl|BL_ORD_ID|13844551 562971.HMPREF0005_00743	789.26	0	99.74
balf_cluster_gene_018538_1	224911.blr8300	gnl|BL_ORD_ID|7502881 224911.blr8300	488.804	5.77512e-172	74	NA	S
balf_cluster_gene_015008_1	926562.Oweho_0081	gnl|BL_ORD_ID|8958088 926562.Oweho_0081	105.145	9.9859e-23	28.27	Membrane	S
balf_cluster_gene_193440_1	562971.HMPREF0005_01931	gnl|BL_ORD_ID|13843894 562971.HMPREF0005_01931	815.068	0	99.24
balf_cluster_gene_163190_1	1048332.SALIVB_0623	gnl|BL_ORD_ID|11804688 1048332.SALIVB_0623	831.632	0	98.26
balf_cluster_gene_132126_1	562971.HMPREF0005_02702	gnl|BL_ORD_ID|13842672 562971.HMPREF0005_02702	781.941	0	99.48
balf_cluster_gene_179144_1	997353.HMPREF9144_0858	gnl|BL_ORD_ID|8557436 997353.HMPREF9144_0858	860.522	0	99.76	succinyl-diaminopimelate desuccinylase activity	E
balf_cluster_gene_038533_1	391600.BBAL3_2664	gnl|BL_ORD_ID|6627167 391600.BBAL3_2664	517.694	7.75758e-178	82.92	3'-5' exoribonuclease that releases 5'-nucleoside monophosphates and is involved in maturation of structured RNAs (By similarity)	K
balf_cluster_gene_197003_1	700598.Niako_5624	gnl|BL_ORD_ID|8362104 700598.Niako_5624	508.449	1.16125e-177	73.13	Catalyzes the attachment of glutamate to tRNA(Glu) in a two-step reaction glutamate is first activated by ATP to form Glu-AMP and then transferred to the acceptor end of tRNA(Glu) (By similarity)	J
balf_cluster_gene_005092_1	441620.Mpop_0374	gnl|BL_ORD_ID|6962100 441620.Mpop_0374	647.121	0	99.7	lAO AO transport system ATPase	E
balf_cluster_gene_183722_1	596322.STRSA0001_1303	gnl|BL_ORD_ID|13200715 596322.STRSA0001_1303	705.286	0	98.01
balf_cluster_gene_033308_1	360104.CCC13826_0922	gnl|BL_ORD_ID|694408 360104.CCC13826_0922	846.655	0	98.33	Involved in the TonB-independent uptake of proteins (By similarity)	U
balf_cluster_gene_020207_1	293826.Amet_3028	gnl|BL_ORD_ID|9327124 293826.Amet_3028	163.696	7.40091e-45	27.57	secreted protein	S
balf_cluster_gene_107744_1	562983.HMPREF0433_00344	gnl|BL_ORD_ID|8445310 562983.HMPREF0433_00344	875.159	0	99.53	Peptidase U32	O
balf_cluster_gene_101539_1	562971.HMPREF0005_01507	gnl|BL_ORD_ID|13842995 562971.HMPREF0005_01507	739.184	0	99.73
balf_cluster_gene_069170_1	114615.BRADO2337	gnl|BL_ORD_ID|5758589 114615.BRADO2337	646.736	0	87.36	amidohydrolase 2	Q
balf_cluster_gene_154420_1	521095.Apar_1111	gnl|BL_ORD_ID|5491404 521095.Apar_1111	766.533	0	97.93	DNA ligase (NAD+) activity	L
balf_cluster_gene_167050_1	562981.HMPREF0428_00325	gnl|BL_ORD_ID|932897 562981.HMPREF0428_00325	658.677	0	98	Membrane	S
balf_cluster_gene_220935_1	709797.CSIRO_2068	gnl|BL_ORD_ID|7182661 709797.CSIRO_2068	640.188	0	94.97	Binding-protein-dependent transport systems inner membrane component	P
balf_cluster_gene_123328_1	888833.HMPREF9421_1480	gnl|BL_ORD_ID|5955148 888833.HMPREF9421_1480	673.7	0	99.4	Dehydrogenase, E1 component	C
balf_cluster_gene_024702_1	931281.PPUBIRD1_4505	gnl|BL_ORD_ID|12174935 931281.PPUBIRD1_4505	275.789	3.07956e-88	38.74
balf_cluster_gene_022502_1	649742.HMPREF0970_00674	gnl|BL_ORD_ID|14220496 649742.HMPREF0970_00674	701.819	0	95.75
balf_cluster_gene_198978_1	1005705.HMPREF9967_1589	gnl|BL_ORD_ID|7525845 1005705.HMPREF9967_1589	664.84	0	98.23	Major Facilitator	G
balf_cluster_gene_168917_1	649742.HMPREF0970_01626	gnl|BL_ORD_ID|14221277 649742.HMPREF0970_01626	642.114	0	95.86
balf_cluster_gene_019463_1	546266.NEIMUCOT_03983	gnl|BL_ORD_ID|2483249 546266.NEIMUCOT_03983	264.233	8.95888e-82	43	Phage Mu protein F like protein	S
balf_cluster_gene_001856_1	680646.RMDY18_09260	gnl|BL_ORD_ID|6600001 680646.RMDY18_09260	679.478	0	94.94	Gcn5-related n-acetyltransferase	S
balf_cluster_gene_213015_1	888833.HMPREF9961_0479	gnl|BL_ORD_ID|5955016 888833.HMPREF9961_0479	659.833	0	98.79	pts system	G
balf_cluster_gene_042144_1	536019.Mesop_0347	gnl|BL_ORD_ID|9618077 536019.Mesop_0347	727.628	0	84.6	Membrane	S
balf_cluster_gene_045204_1	765114.HMPREF9612_00917	gnl|BL_ORD_ID|14693320 765114.HMPREF9612_00917	702.59	0	99.45
balf_cluster_gene_192607_1	905067.HMPREF9626_1718	gnl|BL_ORD_ID|14201375 905067.HMPREF9626_1718	667.152	0	98.78
balf_cluster_gene_108140_1	1007104.SUS17_3512	gnl|BL_ORD_ID|1295542 1007104.SUS17_3512	498.434	4.33916e-174	63.01	The glycine cleavage system catalyzes the degradation of glycine (By similarity)	E
balf_cluster_gene_101924_1	546273.VEIDISOL_00955	gnl|BL_ORD_ID|4289434 546273.VEIDISOL_00955	679.863	0	98.22	type ii secretion system protein e	U
balf_cluster_gene_018182_1	649742.HMPREF0970_01166	gnl|BL_ORD_ID|14221505 649742.HMPREF0970_01166	695.656	0	90.19
balf_cluster_gene_204440_1	1007104.SUS17_3539	gnl|BL_ORD_ID|1294991 1007104.SUS17_3539	261.536	6.16945e-83	45.29	Histidine kinase	T
balf_cluster_gene_069835_1	441620.Mpop_3414	gnl|BL_ORD_ID|6959839 441620.Mpop_3414	635.565	0	98.16	Methyltransferase	S
balf_cluster_gene_165419_1	715226.ABI_08690	gnl|BL_ORD_ID|6579670 715226.ABI_08690	273.092	8.84272e-85	40.95	Phage Mu protein F like protein	S
balf_cluster_gene_119716_1	888828.HMPREF9417_1247	gnl|BL_ORD_ID|10730515 888828.HMPREF9417_1247	796.964	0	98.76
balf_cluster_gene_189786_1	441620.Mpop_5393	gnl|BL_ORD_ID|6958419 441620.Mpop_5393	695.656	0	96.61	GSCFA domain protein	S
balf_cluster_gene_168089_1	450851.PHZ_c1284	gnl|BL_ORD_ID|7725208 450851.PHZ_c1284	713.761	0	87.56	acyl-CoA dehydrogenase	I
balf_cluster_gene_165560_1	203275.BFO_3285	gnl|BL_ORD_ID|9404146 203275.BFO_3285	490.345	3.6033e-172	62.54	periplasmic binding protein	P
balf_cluster_gene_151022_1	394.NGR_c24470	gnl|BL_ORD_ID|7299431 394.NGR_c24470	394.045	1.19326e-133	56.9	Alpha/beta hydrolase of unknown function (DUF900)	S
balf_cluster_gene_114219_1	360104.CCC13826_1530	gnl|BL_ORD_ID|694555 360104.CCC13826_1530	1211.82	0	97.52	ATP-dependent DNA helicase recG	L
balf_cluster_gene_025723_1	979556.MTES_2987	gnl|BL_ORD_ID|6345264 979556.MTES_2987	501.516	4.0559e-176	80.95	Histidyl-trna synthetase	J
balf_cluster_gene_148665_1	690566.Sphch_2381	gnl|BL_ORD_ID|3614994 690566.Sphch_2381	600.127	0	78.07	Catalyzes the 2-thiolation of uridine at the wobble position (U34) of tRNA, leading to the formation of s(2)U34 (By similarity)	J
balf_cluster_gene_000260_1	693982.Sinme_4125	gnl|BL_ORD_ID|11761543 693982.Sinme_4125	323.553	2.2187e-107	46.18
balf_cluster_gene_144562_1	575612.HMPREF0660_01701	gnl|BL_ORD_ID|12438247 575612.HMPREF0660_01701	691.804	0	98.53
balf_cluster_gene_164551_1	411465.PEPMIC_00101	gnl|BL_ORD_ID|3751059 411465.PEPMIC_00101	700.279	0	90.18	S-layer domain protein	S
balf_cluster_gene_155684_1	548476.CaurA7_010100004534	gnl|BL_ORD_ID|793634 548476.CaurA7_010100004534	446.817	6.40895e-156	68.86	prephenate dehydrogenase	E
balf_cluster_gene_035510_1	638301.HMPREF0444_1408	gnl|BL_ORD_ID|2636679 638301.HMPREF0444_1408	699.123	0	97.63	Cysteinyl-tRNA synthetase	J
balf_cluster_gene_138839_1	706436.HMPREF9074_06098	gnl|BL_ORD_ID|4308269 706436.HMPREF9074_06098	761.14	0	96.89	tonB-dependent Receptor	P
balf_cluster_gene_026739_1	553175.POREN0001_0171	gnl|BL_ORD_ID|8274043 553175.POREN0001_0171	197.593	5.56765e-56	30.42	of methanol dehydrogenase type	S
balf_cluster_gene_220932_1	596315.HMPREF0634_1415	gnl|BL_ORD_ID|5779735 596315.HMPREF0634_1415	780.4	0	95.2	Catalyzes the ATP-dependent transfer of a sulfur to tRNA to produce 4-thiouridine in position 8 of tRNAs, which functions as a near-UV photosensor. Also catalyzes the transfer of sulfur to the sulfur carrier protein ThiS, forming ThiS-thiocarboxylate. This is a step in the synthesis of thiazole, in the thiamine biosynthesis pathway. The sulfur is donated as persulfide by IscS (By similarity)	H
balf_cluster_gene_144689_1	546264.NEIFLAOT_02419	gnl|BL_ORD_ID|4568837 546264.NEIFLAOT_02419	728.783	0	98.62	metallophosphoesterase	S
balf_cluster_gene_058498_1	592031.GCWU000322_00289	gnl|BL_ORD_ID|4824683 592031.GCWU000322_00289	503.056	2.46594e-175	60.66	Cell wall formation. Adds enolpyruvyl to UDP-N- acetylglucosamine (By similarity)	M
balf_cluster_gene_231719_1	596309.RHOER0001_0052	gnl|BL_ORD_ID|9819815 596309.RHOER0001_0052	673.7	0	99.43
balf_cluster_gene_089701_1	562971.HMPREF0005_04160	gnl|BL_ORD_ID|13843419 562971.HMPREF0005_04160	644.425	0	99.38
balf_cluster_gene_072598_1	649742.HMPREF0970_01889	gnl|BL_ORD_ID|14221103 649742.HMPREF0970_01889	406.757	5.51196e-140	56.73
balf_cluster_gene_130738_1	450851.PHZ_c3534	gnl|BL_ORD_ID|7727605 450851.PHZ_c3534	526.168	0	76.45	Catalyzes the decarboxylation of four acetate groups of uroporphyrinogen-III to yield coproporphyrinogen-III (By similarity)	H
balf_cluster_gene_164676_1	314266.SKA58_02175	gnl|BL_ORD_ID|8817752 314266.SKA58_02175	501.516	6.7092e-176	61.87
balf_cluster_gene_116609_1	765698.Mesci_1291	gnl|BL_ORD_ID|2845471 765698.Mesci_1291	458.373	5.27475e-159	64.84
balf_cluster_gene_204094_1	888048.HMPREF8577_0290	gnl|BL_ORD_ID|4165805 888048.HMPREF8577_0290	555.444	0	64.68
balf_cluster_gene_025090_1	536019.Mesop_4033	gnl|BL_ORD_ID|9617812 536019.Mesop_4033	786.949	0	93.1	aminotransferase	E
balf_cluster_gene_215051_1	700598.Niako_6053	gnl|BL_ORD_ID|8360727 700598.Niako_6053	407.527	3.87106e-140	58.31	Is involved in NO detoxification in an aerobic process, termed nitric oxide dioxygenase (NOD) reaction that utilizes O(2) and NAD(P)H to convert NO to nitrate, which protects the bacterium from various noxious nitrogen compounds. Therefore, plays a central role in the inducible response to nitrosative stress (By similarity)	C
balf_cluster_gene_175503_1	762963.HMPREF9056_02994	gnl|BL_ORD_ID|2996892 762963.HMPREF9056_02994	537.339	0	63.44	Acts as a processive, ATP-dependent zinc metallopeptidase for both cytoplasmic and membrane proteins. Plays a role in the quality control of integral membrane proteins (By similarity)	O
balf_cluster_gene_071634_1	596154.Alide2_1762	gnl|BL_ORD_ID|706229 596154.Alide2_1762	458.759	1.26602e-158	62.44	Chromate	P
balf_cluster_gene_081953_1	553178.CAPGI0001_1212	gnl|BL_ORD_ID|9247614 553178.CAPGI0001_1212	739.954	0	99.17	4fe-4S ferredoxin iron-sulfur binding domain protein	C
balf_cluster_gene_219410_1	596315.HMPREF0634_1339	gnl|BL_ORD_ID|5779816 596315.HMPREF0634_1339	649.432	0	96.04	nOP2 Sun	J
balf_cluster_gene_173905_1	879309.HMPREF9199_0139	gnl|BL_ORD_ID|1836822 879309.HMPREF9199_0139	774.622	0	98.96	Cell Division Protein	D
balf_cluster_gene_092065_1	349102.Rsph17025_0802	gnl|BL_ORD_ID|2025010 349102.Rsph17025_0802	434.491	5.65925e-151	68.34	Transposase	L
balf_cluster_gene_186633_1	224911.blr3364	gnl|BL_ORD_ID|7503930 224911.blr3364	577.785	0	68.55	oxidoreductase activity, acting on paired donors, with incorporation or reduction of molecular oxygen, NAD(P)H as one donor, and incorporation of one atom of oxygen	C:H
balf_cluster_gene_180699_1	224911.blr7828	gnl|BL_ORD_ID|7500272 224911.blr7828	618.231	0	73.35	ABC transporter substrate-binding protein	E
balf_cluster_gene_168080_1	596309.RHOER0001_3853	gnl|BL_ORD_ID|9819678 596309.RHOER0001_3853	795.423	0	99.49
balf_cluster_gene_008071_1	365659.smi_0583	gnl|BL_ORD_ID|4644964 365659.smi_0583	783.097	0	97.44	replication initiation and membrane attachment	L
balf_cluster_gene_172708_1	266835.mlr7322	gnl|BL_ORD_ID|7532531 266835.mlr7322	528.094	0	79.81	Is involved in NO detoxification in an aerobic process, termed nitric oxide dioxygenase (NOD) reaction that utilizes O(2) and NAD(P)H to convert NO to nitrate, which protects the bacterium from various noxious nitrogen compounds. Therefore, plays a central role in the inducible response to nitrosative stress (By similarity)	C
balf_cluster_gene_191721_1	649742.HMPREF0970_00447	gnl|BL_ORD_ID|14221843 649742.HMPREF0970_00447	686.411	0	97.13
balf_cluster_gene_059602_1	525260.HMPREF0276_1330	gnl|BL_ORD_ID|2136666 525260.HMPREF0276_1330	504.212	7.75749e-178	70.57	Required for the formation of a threonylcarbamoyl group on adenosine at position 37 (t(6)A37) in tRNAs that read codons beginning with adenine (By similarity)	O
balf_cluster_gene_084771_1	441620.Mpop_1751	gnl|BL_ORD_ID|6961467 441620.Mpop_1751	791.956	0	99.74	Succinyl-CoA synthetase subunit beta	C
balf_cluster_gene_063554_1	391008.Smal_1253	gnl|BL_ORD_ID|3015728 391008.Smal_1253	507.679	2.00268e-177	62.65	Condensation of UDP-2,3-diacylglucosamine and 2,3- diacylglucosamine-1-phosphate to form lipid A disaccharide, a precursor of lipid A, a phosphorylated glycolipid that anchors the lipopolysaccharide to the outer membrane of the cell (By similarity)	M
balf_cluster_gene_131578_1	562983.HMPREF0433_01620	gnl|BL_ORD_ID|8445466 562983.HMPREF0433_01620	764.607	0	99.46	Fe-S assembly protein	O
balf_cluster_gene_040187_1	288000.BBta_3427	gnl|BL_ORD_ID|9069851 288000.BBta_3427	625.935	0	77.64	Efflux transporter rnd family, mfp subunit	P
balf_cluster_gene_222991_1	888052.HMPREF9006_1651	gnl|BL_ORD_ID|8697865 888052.HMPREF9006_1651	526.939	0	81.14	DNAj domain protein	O
balf_cluster_gene_148633_1	279238.Saro_2343	gnl|BL_ORD_ID|3554855 279238.Saro_2343	630.172	0	95.36	thioredoxin reductase	O
balf_cluster_gene_190361_1	471857.Svir_28920	gnl|BL_ORD_ID|8850780 471857.Svir_28920	352.443	9.22305e-116	45.48	Monooxygenase	P
balf_cluster_gene_060609_1	862512.HMPREF0277_2122	gnl|BL_ORD_ID|10365614 862512.HMPREF0277_2122	815.839	0	98.82
balf_cluster_gene_042230_1	428406.Rpic12D_2232	gnl|BL_ORD_ID|13821701 428406.Rpic12D_2232	730.324	0	95.38
balf_cluster_gene_172930_1	765698.Mesci_3108	gnl|BL_ORD_ID|2841033 765698.Mesci_3108	595.89	0	89.51	(ABC) transporter	P
balf_cluster_gene_105883_1	525268.HMPREF0308_0979	gnl|BL_ORD_ID|9579859 525268.HMPREF0308_0979	260.766	6.62342e-83	41.18	NA	S
balf_cluster_gene_218496_1	633149.Bresu_1625	gnl|BL_ORD_ID|7578797 633149.Bresu_1625	540.806	0	80.61	Aldo keto reductase	C
balf_cluster_gene_033261_1	196164.HMPREF0290_2848	gnl|BL_ORD_ID|8642540 196164.HMPREF0290_2848	486.878	8.95363e-170	59.41	Catalytic subunit of the tRNA-splicing ligase complex that acts by directly joining spliced tRNA halves to mature-sized tRNAs by incorporating the precursor-derived splice junction phosphate into the mature tRNA as a canonical 3',5'- phosphodiester. May act as a RNA ligase with broad substrate specificity, and may function toward other RNAs (By similarity)	S
balf_cluster_gene_093638_1	546273.VEIDISOL_01788	gnl|BL_ORD_ID|4288581 546273.VEIDISOL_01788	855.514	0	98.57	Catalyzes the transfer of the alpha-amino group from S- adenosyl-L-methionine (SAM) to 7-keto-8-aminopelargonic acid (KAPA) to form 7,8-diaminopelargonic acid (DAPA). It is the only animotransferase known to utilize SAM as an amino donor (By similarity)	E
balf_cluster_gene_183163_1	1005705.HMPREF9967_0819	gnl|BL_ORD_ID|7525744 1005705.HMPREF9967_0819	663.3	0	88.83	NA	S
balf_cluster_gene_015641_1	658664.HMPREF1004_02774	gnl|BL_ORD_ID|14819079 658664.HMPREF1004_02774	660.218	0	93.14
balf_cluster_gene_077955_1	657323.CK1_06220	gnl|BL_ORD_ID|6458866 657323.CK1_06220	271.166	2.1294e-83	38.42	Catalyzes the conversion of glucosamine-6-phosphate to glucosamine-1-phosphate (By similarity)	G
balf_cluster_gene_173902_1	546263.NEIELOOT_02605	gnl|BL_ORD_ID|5510405 546263.NEIELOOT_02605	732.25	0	93.85	Methyltransferase	Q
balf_cluster_gene_079912_1	702113.PP1Y_AT2993	gnl|BL_ORD_ID|4885008 702113.PP1Y_AT2993	825.083	0	96.89	Exonuclease	L
balf_cluster_gene_113957_1	649742.HMPREF0970_02273	gnl|BL_ORD_ID|14220963 649742.HMPREF0970_02273	623.239	0	98.19
balf_cluster_gene_024627_1	553201.ROTMU0001_0349	gnl|BL_ORD_ID|9778476 553201.ROTMU0001_0349	655.21	0	90.33
balf_cluster_gene_152249_1	395960.Rpal_2562	gnl|BL_ORD_ID|12859665 395960.Rpal_2562	430.254	1.22659e-149	66.36
balf_cluster_gene_188383_1	596309.RHOER0001_1541	gnl|BL_ORD_ID|9825538 596309.RHOER0001_1541	714.531	0	99.16
balf_cluster_gene_147455_1	441620.Mpop_0894	gnl|BL_ORD_ID|6958721 441620.Mpop_0894	722.62	0	99.72	Peptide chain release factor 1 directs the termination of translation in response to the peptide chain termination codons UAG and UAA (By similarity)	J
balf_cluster_gene_051581_1	888833.HMPREF9421_0665	gnl|BL_ORD_ID|5954505 888833.HMPREF9421_0665	726.087	0	99.46	Involved in the import of serine and threonine into the cell, with the concomitant import of sodium (symport system) (By similarity)	E
balf_cluster_gene_042079_1	1002339.HMPREF9373_0582	gnl|BL_ORD_ID|2810408 1002339.HMPREF9373_0582	598.586	0	74.62	Type I secretion membrane fusion protein (HlyD	U
balf_cluster_gene_154446_1	562971.HMPREF0005_00735	gnl|BL_ORD_ID|13844543 562971.HMPREF0005_00735	732.25	0	99.16
balf_cluster_gene_136834_1	698972.CDB402_1022	gnl|BL_ORD_ID|14630782 698972.CDB402_1022	406.371	2.00809e-138	53.14
balf_cluster_gene_182765_1	700598.Niako_1527	gnl|BL_ORD_ID|8359888 700598.Niako_1527	738.413	0	87.56	Catalyzes the formation of S-adenosylmethionine from methionine and ATP	H
balf_cluster_gene_133742_1	352165.HMPREF7215_0778	gnl|BL_ORD_ID|7387036 352165.HMPREF7215_0778	275.404	4.17459e-88	39.83	(citrate (pro-3S)-lyase ligase	C
balf_cluster_gene_111768_1	391600.BBAL3_1219	gnl|BL_ORD_ID|6627836 391600.BBAL3_1219	772.311	0	93.53	acetyl-coa acetyltransferase	I
balf_cluster_gene_118495_1	596320.NEIFL0001_1646	gnl|BL_ORD_ID|891850 596320.NEIFL0001_1646	809.29	0	98.74	receptor	P
balf_cluster_gene_130638_1	862965.PARA_16910	gnl|BL_ORD_ID|3062570 862965.PARA_16910	772.311	0	98.15	N-(5'-phosphoribosyl)anthranilate isomerase	E
balf_cluster_gene_140855_1	546273.VEIDISOL_00793	gnl|BL_ORD_ID|4289278 546273.VEIDISOL_00793	770	0	90.32	UPF0348 protein	S
balf_cluster_gene_189649_1	224911.blr4591	gnl|BL_ORD_ID|7500884 224911.blr4591	637.106	0	73.81	acid--CoA ligase	Q
balf_cluster_gene_227990_1	641149.HMPREF9016_01670	gnl|BL_ORD_ID|6000920 641149.HMPREF9016_01670	703.36	0	95.22	Filamentation induced by cAMP protein fic	S
balf_cluster_gene_067650_1	649742.HMPREF0970_01303	gnl|BL_ORD_ID|14221430 649742.HMPREF0970_01303	586.26	0	79.77
balf_cluster_gene_095617_1	888741.HMPREF9098_0205	gnl|BL_ORD_ID|6900310 888741.HMPREF9098_0205	228.409	1.36341e-69	38.12	Efflux transporter rnd family, mfp subunit	V
balf_cluster_gene_196601_1	1007104.SUS17_4011	gnl|BL_ORD_ID|1294924 1007104.SUS17_4011	421.009	5.15291e-145	66.12	dihydropteroate synthase	H
balf_cluster_gene_072975_1	411466.ACTODO_00929	gnl|BL_ORD_ID|1771759 411466.ACTODO_00929	595.89	0	88.95	Part of the ABC transporter complex MetNIQ involved in methionine import. Responsible for energy coupling to the transport system (By similarity)	P
balf_cluster_gene_056745_1	997348.HMPREF9418_0958	gnl|BL_ORD_ID|10895579 997348.HMPREF9418_0958	650.973	0	78.89
balf_cluster_gene_037019_1	638301.HMPREF0444_1657	gnl|BL_ORD_ID|2635747 638301.HMPREF0444_1657	612.068	0	97.56	Membrane	S
balf_cluster_gene_112825_1	944560.HMPREF9058_1702	gnl|BL_ORD_ID|6433617 944560.HMPREF9058_1702	626.32	0	77.47	acetate kinase activity	C
balf_cluster_gene_085378_1	680646.RMDY18_04700	gnl|BL_ORD_ID|6600259 680646.RMDY18_04700	771.926	0	100	This protein promotes the GTP-dependent binding of aminoacyl-tRNA to the A-site of ribosomes during protein biosynthesis (By similarity)	J
balf_cluster_gene_150391_1	553219.CAMSH0001_1837	gnl|BL_ORD_ID|7357120 553219.CAMSH0001_1837	674.085	0	86.22	1-aminocyclopropane-1-carboxylate deaminase	E
balf_cluster_gene_036711_1	997353.HMPREF9144_0380	gnl|BL_ORD_ID|8557675 997353.HMPREF9144_0380	769.615	0	99.73	Involved in mRNA degradation. Hydrolyzes single-stranded polyribonucleotides processively in the 3'- to 5'-direction (By similarity)	J
balf_cluster_gene_186268_1	553201.ROTMU0001_1732	gnl|BL_ORD_ID|9779998 553201.ROTMU0001_1732	692.96	0	98.01
balf_cluster_gene_172428_1	469621.HMPREF0400_01466	gnl|BL_ORD_ID|10456475 469621.HMPREF0400_01466	658.292	0	99.38
balf_cluster_gene_010467_1	1042878.CNE_2c20400	gnl|BL_ORD_ID|10632159 1042878.CNE_2c20400	509.22	1.12382e-178	74.44
balf_cluster_gene_021004_1	485917.Phep_0657	gnl|BL_ORD_ID|6232173 485917.Phep_0657	486.878	1.82638e-169	60.33	beta-glucosidase	G
balf_cluster_gene_195672_1	279238.Saro_0994	gnl|BL_ORD_ID|3556436 279238.Saro_0994	596.66	0	78.77	Aminoglycoside phosphotransferase	S
balf_cluster_gene_155270_1	879309.HMPREF9199_1105	gnl|BL_ORD_ID|1835395 879309.HMPREF9199_1105	692.189	0	99.41	glyceraldehyde3phosphate dehydrogenase	G
balf_cluster_gene_193614_1	765698.Mesci_6022	gnl|BL_ORD_ID|2844859 765698.Mesci_6022	572.392	0	82.06	type ii secretion system	U
balf_cluster_gene_128898_1	441620.Mpop_3076	gnl|BL_ORD_ID|6962734 441620.Mpop_3076	554.673	0	73.47	replication	L
balf_cluster_gene_061919_1	680646.RMDY18_04650	gnl|BL_ORD_ID|6601083 680646.RMDY18_04650	795.423	0	93.62	Ceramidase	S
balf_cluster_gene_113054_1	562971.HMPREF0005_02485	gnl|BL_ORD_ID|13840431 562971.HMPREF0005_02485	811.216	0	99.74
balf_cluster_gene_140852_1	662755.CRES_1370	gnl|BL_ORD_ID|4231280 662755.CRES_1370	579.711	0	82.25	Alpha-keto-beta-hydroxylacyl reductoisomerase	E
balf_cluster_gene_025963_1	905067.HMPREF9626_0242	gnl|BL_ORD_ID|14201852 905067.HMPREF9626_0242	562.377	0	81.93
balf_cluster_gene_021263_1	553219.CAMSH0001_0973	gnl|BL_ORD_ID|7358319 553219.CAMSH0001_0973	847.81	0	97.13	domain protein	C
balf_cluster_gene_013399_1	435832.HMPREF0604_00831	gnl|BL_ORD_ID|8433491 435832.HMPREF0604_00831	677.167	0	92.2	Transporter	P
balf_cluster_gene_126164_1	411466.ACTODO_01720	gnl|BL_ORD_ID|1772202 411466.ACTODO_01720	726.472	0	95.36	UDP-galactopyranose mutase	M
balf_cluster_gene_039785_1	546273.VEIDISOL_01437	gnl|BL_ORD_ID|4289680 546273.VEIDISOL_01437	647.892	0	94.64	Hydrogenase expression formation protein HypE	O
balf_cluster_gene_037010_1	887929.HMP0721_0885	gnl|BL_ORD_ID|481659 887929.HMP0721_0885	361.688	1.6768e-121	51.01	Membrane bOund o-acyl transferase mboat family protein	M
balf_cluster_gene_126372_1	441620.Mpop_0892	gnl|BL_ORD_ID|6958715 441620.Mpop_0892	764.222	0	98.31	NA	S
balf_cluster_gene_172972_1	562973.HMPREF0059_02618	gnl|BL_ORD_ID|12553721 562973.HMPREF0059_02618	225.713	1.64742e-65	34.93
balf_cluster_gene_224249_1	930171.Asphe3_29990	gnl|BL_ORD_ID|639423 930171.Asphe3_29990	292.352	4.20408e-93	41.06	domain protein	S
balf_cluster_gene_114403_1	649742.HMPREF0970_01907	gnl|BL_ORD_ID|14221121 649742.HMPREF0970_01907	411.379	3.30197e-138	65.68
balf_cluster_gene_018913_1	979556.MTES_3526	gnl|BL_ORD_ID|6344180 979556.MTES_3526	498.434	6.84654e-171	61.76	Xylose isomerase domain protein TIM barrel	G
balf_cluster_gene_030870_1	525263.HMPREF0298_0288	gnl|BL_ORD_ID|3964300 525263.HMPREF0298_0288	435.647	6.70612e-150	57.68	phosphate abc transporter	P
balf_cluster_gene_179792_1	314266.SKA58_02005	gnl|BL_ORD_ID|8816998 314266.SKA58_02005	406.757	4.88332e-138	46.9	rieske 2fe-2S domain-containing protein	P
balf_cluster_gene_019565_1	888048.HMPREF8577_0556	gnl|BL_ORD_ID|4165042 888048.HMPREF8577_0556	729.939	0	99.72	Peptide chain release factor 1 directs the termination of translation in response to the peptide chain termination codons UAG and UAA (By similarity)	J
balf_cluster_gene_228875_1	563191.ACDG_01439	gnl|BL_ORD_ID|9942653 563191.ACDG_01439	396.356	3.21487e-134	58.96
balf_cluster_gene_025159_1	1007104.SUS17_3771	gnl|BL_ORD_ID|1295555 1007104.SUS17_3771	296.204	1.25662e-95	48.66	NA	S
balf_cluster_gene_167849_1	709797.CSIRO_3104	gnl|BL_ORD_ID|7183047 709797.CSIRO_3104	746.888	0	92.29	extracellular ligand-binding receptor	E
balf_cluster_gene_132506_1	888742.HMPREF9123_1730	gnl|BL_ORD_ID|2198278 888742.HMPREF9123_1730	554.288	0	70.08	conserved protein UCP015557	S
balf_cluster_gene_085418_1	224911.blr6446	gnl|BL_ORD_ID|7498495 224911.blr6446	724.546	0	82.93	(ABC) transporter	E
balf_cluster_gene_081532_1	1030843.PGTDC60_1775	gnl|BL_ORD_ID|14462629 1030843.PGTDC60_1775	421.009	1.77793e-145	64.06
balf_cluster_gene_133665_1	700598.Niako_2175	gnl|BL_ORD_ID|8362826 700598.Niako_2175	399.438	1.15509e-135	62.21	Transfers the N-acyl diglyceride group on what will become the N-terminal cysteine of membrane lipoproteins (By similarity)	M
balf_cluster_gene_043035_1	536019.Mesop_3610	gnl|BL_ORD_ID|9617888 536019.Mesop_3610	560.066	0	76.28	Part of the ABC transporter complex ModABC involved in molybdenum import. Responsible for energy coupling to the transport system (By similarity)	P
balf_cluster_gene_220744_1	979556.MTES_3291	gnl|BL_ORD_ID|6345255 979556.MTES_3291	533.487	0	79.83	DNA ligase (NAD+) activity	L
balf_cluster_gene_183006_1	457421.CBFG_04396	gnl|BL_ORD_ID|2932401 457421.CBFG_04396	348.591	1.44012e-116	45.83	extracellular solute-binding protein, family 1	P
balf_cluster_gene_014658_1	335284.Pcryo_1948	gnl|BL_ORD_ID|2020838 335284.Pcryo_1948	156.377	4.58502e-40	27.82
balf_cluster_gene_133204_1	391595.RLO149_c010920	gnl|BL_ORD_ID|9375340 391595.RLO149_c010920	492.656	1.46852e-171	61.71	Integrase	L
balf_cluster_gene_111478_1	1007104.SUS17_2174	gnl|BL_ORD_ID|1295635 1007104.SUS17_2174	523.087	0	77.03	Catalyzes the reversible formation of acyl-phosphate (acyl-PO(4)) from acyl- acyl-carrier-protein (acyl-ACP). This enzyme utilizes acyl-ACP as fatty acyl donor, but not acyl-CoA (By similarity)	I
balf_cluster_gene_093138_1	439495.PJE062_1755	gnl|BL_ORD_ID|13585600 439495.PJE062_1755	139.428	3.91384e-33	32.04
balf_cluster_gene_176960_1	391600.BBAL3_2990	gnl|BL_ORD_ID|6628654 391600.BBAL3_2990	587.415	0	80.52	Catalyzes the addition and repair of the essential 3'- terminal CCA sequence in tRNAs without using a nucleic acid template. Adds these three nucleotides in the order of C, C, and A to the tRNA nucleotide-73, using CTP and ATP as substrates and producing inorganic pyrophosphate	J
balf_cluster_gene_045089_1	553177.CAPSP0001_0513	gnl|BL_ORD_ID|8152662 553177.CAPSP0001_0513	178.718	5.12038e-50	34.88	of methanol dehydrogenase type	S
balf_cluster_gene_017347_1	700598.Niako_4584	gnl|BL_ORD_ID|8357993 700598.Niako_4584	337.035	1.31884e-110	52.34	nOP2 Sun	J
balf_cluster_gene_084638_1	596309.RHOER0001_3840	gnl|BL_ORD_ID|9819665 596309.RHOER0001_3840	667.152	0	95.4
balf_cluster_gene_029224_1	879309.HMPREF9199_1742	gnl|BL_ORD_ID|1836673 879309.HMPREF9199_1742	828.165	0	96.36	Catalyzes the specific phosphorylation of the 3-hydroxyl group of shikimic acid using ATP as a cosubstrate (By similarity)	E
balf_cluster_gene_105961_1	680646.RMDY18_02100	gnl|BL_ORD_ID|6600687 680646.RMDY18_02100	622.468	0	88.42	membrane	S
balf_cluster_gene_146213_1	649742.HMPREF0970_01275	gnl|BL_ORD_ID|14221402 649742.HMPREF0970_01275	498.819	1.34691e-175	74.69
balf_cluster_gene_139718_1	450851.PHZ_c3423	gnl|BL_ORD_ID|7726067 450851.PHZ_c3423	644.04	0	78.88	Phosphopantothenoylcysteine decarboxylase	H
balf_cluster_gene_104650_1	700598.Niako_4441	gnl|BL_ORD_ID|8358089 700598.Niako_4441	639.417	0	80.85	cysteine desulfurase	E
balf_cluster_gene_137879_1	889204.HMPREF9423_0087	gnl|BL_ORD_ID|11221307 889204.HMPREF9423_0087	523.857	0	82.21
balf_cluster_gene_044277_1	657315.ROI_11900	gnl|BL_ORD_ID|14689681 657315.ROI_11900	422.55	6.23448e-145	56.61
balf_cluster_gene_056528_1	523794.Lebu_0385	gnl|BL_ORD_ID|976029 523794.Lebu_0385	714.916	0	96.32	hydrolase family 57	G
balf_cluster_gene_070879_1	596309.RHOER0001_2411	gnl|BL_ORD_ID|9821324 596309.RHOER0001_2411	768.459	0	99.48
balf_cluster_gene_070907_1	411466.ACTODO_01044	gnl|BL_ORD_ID|1772259 411466.ACTODO_01044	739.184	0	93.78	homoserine O-acetyltransferase	E
balf_cluster_gene_186381_1	944560.HMPREF9058_0430	gnl|BL_ORD_ID|6433870 944560.HMPREF9058_0430	749.199	0	98.45	transcriptioN-repair coupling factor	L
balf_cluster_gene_126737_1	596320.NEIFL0001_1639	gnl|BL_ORD_ID|890367 596320.NEIFL0001_1639	380.563	3.75983e-128	52.39	Glycosyl transferase, family 2	M
balf_cluster_gene_037129_1	562983.HMPREF0433_01430	gnl|BL_ORD_ID|8446555 562983.HMPREF0433_01430	688.337	0	99.7	Catalyzes the synthesis of dihydrouridine a modified base found in the D-loop of most tRNAs (By similarity)	J
balf_cluster_gene_189249_1	1046629.Ssal_01959	gnl|BL_ORD_ID|7162091 1046629.Ssal_01959	814.683	0	95.37	Hydrolase	S
balf_cluster_gene_135918_1	596320.NEIFL0001_0959	gnl|BL_ORD_ID|890278 596320.NEIFL0001_0959	679.093	0	98.5	delta-aminolevulinic acid dehydratase	H
balf_cluster_gene_020338_1	889204.HMPREF9423_0831	gnl|BL_ORD_ID|11220078 889204.HMPREF9423_0831	754.592	0	97.34
balf_cluster_gene_075992_1	997353.HMPREF9144_0672	gnl|BL_ORD_ID|8558227 997353.HMPREF9144_0672	683.33	0	98.81	Condensation of UDP-2,3-diacylglucosamine and 2,3- diacylglucosamine-1-phosphate to form lipid A disaccharide, a precursor of lipid A, a phosphorylated glycolipid that anchors the lipopolysaccharide to the outer membrane of the cell (By similarity)	M
balf_cluster_gene_162840_1	1007104.SUS17_133	gnl|BL_ORD_ID|1297444 1007104.SUS17_133	522.702	0	70.03	radical SAM domain protein	L
balf_cluster_gene_106044_1	441620.Mpop_4963	gnl|BL_ORD_ID|6959456 441620.Mpop_4963	677.167	0	99.15	Metal Dependent Phosphohydrolase	T
balf_cluster_gene_222386_1	888833.HMPREF9421_1629	gnl|BL_ORD_ID|5954536 888833.HMPREF9421_1629	828.55	0	97.12	GTPase that associates with the 50S ribosomal subunit and may have a role during protein synthesis or ribosome biogenesis (By similarity)	S
balf_cluster_gene_028772_1	562971.HMPREF0005_04357	gnl|BL_ORD_ID|13840200 562971.HMPREF0005_04357	635.18	0	94.89
balf_cluster_gene_071760_1	706436.HMPREF9074_02946	gnl|BL_ORD_ID|4306713 706436.HMPREF9074_02946	620.542	0	72.43	The beta subunit is responsible for the synthesis of L- tryptophan from indole and L-serine (By similarity)	E
balf_cluster_gene_051200_1	266835.mlr0958	gnl|BL_ORD_ID|7533285 266835.mlr0958	714.531	0	81.88	Integrase	S
balf_cluster_gene_165623_1	314266.SKA58_01905	gnl|BL_ORD_ID|8817809 314266.SKA58_01905	569.311	0	75.77	nitrite reductase	C
balf_cluster_gene_039137_1	411465.PEPMIC_01681	gnl|BL_ORD_ID|3752638 411465.PEPMIC_01681	776.933	0	99.48	Plays an important role in the de novo pathway of purine nucleotide biosynthesis	F
balf_cluster_gene_188830_1	203275.BFO_2712	gnl|BL_ORD_ID|9403803 203275.BFO_2712	330.102	3.36707e-106	49.85	Oxaloacetate decarboxylase	C
balf_cluster_gene_096968_1	391601.SSKA14_1125	gnl|BL_ORD_ID|14512810 391601.SSKA14_1125	389.037	7.48002e-132	54.55
balf_cluster_gene_190276_1	340100.Bpet2623	gnl|BL_ORD_ID|4576240 340100.Bpet2623	357.836	2.71461e-119	50	PepSY-associated TM helix	S
balf_cluster_gene_227336_1	1003200.AXXA_13184	gnl|BL_ORD_ID|3461586 1003200.AXXA_13184	357.451	2.74308e-119	51.03	amino acid ABC transporter	E
balf_cluster_gene_173140_1	553178.CAPGI0001_1665	gnl|BL_ORD_ID|9248427 553178.CAPGI0001_1665	665.226	0	89.47	signal peptide protein	S
balf_cluster_gene_001768_1	862965.PARA_18250	gnl|BL_ORD_ID|3063025 862965.PARA_18250	874.004	0	99.05	deaminase	F
balf_cluster_gene_197437_1	562983.HMPREF0433_00054	gnl|BL_ORD_ID|8446283 562983.HMPREF0433_00054	681.019	0	97.66	glycerol-3-phosphate dehydrogenase	C
balf_cluster_gene_078818_1	411466.ACTODO_00146	gnl|BL_ORD_ID|1772754 411466.ACTODO_00146	627.476	0	88.05	phosphoribosylaminoimidazole carboxylase atpase subunit	F
balf_cluster_gene_174773_1	979556.MTES_3131	gnl|BL_ORD_ID|6346079 979556.MTES_3131	432.565	2.0795e-147	61.93	phytoene	Q
balf_cluster_gene_094023_1	562971.HMPREF0005_02405	gnl|BL_ORD_ID|13840351 562971.HMPREF0005_02405	636.336	0	99.07
balf_cluster_gene_029731_1	944564.HMPREF9200_1560	gnl|BL_ORD_ID|4065555 944564.HMPREF9200_1560	402.519	2.11149e-137	51.35
balf_cluster_gene_076981_1	997830.HMPREF1124_0622	gnl|BL_ORD_ID|4483870 997830.HMPREF1124_0622	722.62	0	98.87	(ABC) transporter	E:P
balf_cluster_gene_155459_1	680646.RMDY18_06660	gnl|BL_ORD_ID|6599294 680646.RMDY18_06660	657.136	0	96.95	Histidine kinase	T
balf_cluster_gene_027931_1	259536.Psyc_0063	gnl|BL_ORD_ID|7652937 259536.Psyc_0063	645.966	0	80.15	Type ii secretion system	U
balf_cluster_gene_191460_1	435832.HMPREF0604_01862	gnl|BL_ORD_ID|8434011 435832.HMPREF0604_01862	815.453	0	98.55	amino acid transport	E
balf_cluster_gene_143539_1	190486.XAC1012	gnl|BL_ORD_ID|3049370 190486.XAC1012	554.673	0	77.41	Ompa motb domain protein	M
balf_cluster_gene_164873_1	709797.CSIRO_0421	gnl|BL_ORD_ID|7184335 709797.CSIRO_0421	575.474	0	77.97	N-formylglutamate amidohydrolase	E
balf_cluster_gene_105510_1	203275.BFO_1363	gnl|BL_ORD_ID|9406008 203275.BFO_1363	738.028	0	85.32	Dehydrogenase	C
balf_cluster_gene_205334_1	944560.HMPREF9058_1847	gnl|BL_ORD_ID|6432335 944560.HMPREF9058_1847	728.783	0	99.72	fumarate hydratase class II	C
balf_cluster_gene_095796_1	765698.Mesci_4841	gnl|BL_ORD_ID|2840933 765698.Mesci_4841	605.52	0	79.25	Imidazole acetol-phosphate transaminase	E
balf_cluster_gene_166816_1	546263.NEIELOOT_00668	gnl|BL_ORD_ID|5508600 546263.NEIELOOT_00668	706.057	0	98.55	Histone deacetylase	B:Q
balf_cluster_gene_089352_1	347253.SALIVA_1831	gnl|BL_ORD_ID|14145993 347253.SALIVA_1831	829.706	0	98.32
balf_cluster_gene_180695_1	888048.HMPREF8577_1059	gnl|BL_ORD_ID|4166749 888048.HMPREF8577_1059	678.322	0	99.71	Membrane	S
balf_cluster_gene_212541_1	706436.HMPREF9074_01731	gnl|BL_ORD_ID|4307469 706436.HMPREF9074_01731	616.69	0	90.49	domain protein	S
balf_cluster_gene_014798_1	224911.blr2964	gnl|BL_ORD_ID|7496421 224911.blr2964	608.986	0	76.81	major facilitator superfamily MFS_1	P
balf_cluster_gene_229468_1	979556.MTES_0795	gnl|BL_ORD_ID|6343799 979556.MTES_0795	322.783	2.26312e-104	50.74	Glycosyl transferase (Group 1	M
balf_cluster_gene_173602_1	596309.RHOER0001_6337	gnl|BL_ORD_ID|9825017 596309.RHOER0001_6337	714.531	0	88.92
balf_cluster_gene_104141_1	288000.BBta_7081	gnl|BL_ORD_ID|9075765 288000.BBta_7081	512.686	2.29397e-179	56.19	ABC transporter substrate-binding protein	E
balf_cluster_gene_169899_1	347253.SALIVA_2076	gnl|BL_ORD_ID|14146232 347253.SALIVA_2076	701.049	0	99.71
balf_cluster_gene_218035_1	224911.blr0899	gnl|BL_ORD_ID|7496124 224911.blr0899	501.516	3.9102e-175	59.86	depolymerase	Q
balf_cluster_gene_143853_1	905067.HMPREF9626_0185	gnl|BL_ORD_ID|14201799 905067.HMPREF9626_0185	556.599	5.02767e-178	74.4
balf_cluster_gene_207013_1	450851.PHZ_c3345	gnl|BL_ORD_ID|7726389 450851.PHZ_c3345	663.3	0	79.95	Threonine dehydratase	E
balf_cluster_gene_093076_1	575612.HMPREF0660_00420	gnl|BL_ORD_ID|12437663 575612.HMPREF0660_00420	744.962	0	99.45
balf_cluster_gene_108404_1	553175.POREN0001_1281	gnl|BL_ORD_ID|8274845 553175.POREN0001_1281	699.893	0	98.31	Heat shock protein	O
balf_cluster_gene_046790_1	441620.Mpop_0641	gnl|BL_ORD_ID|6958031 441620.Mpop_0641	712.605	0	97.27	Catalyzes the interconversion of methylthioribose-1- phosphate (MTR-1-P) into methylthioribulose-1-phosphate (MTRu-1-P) (By similarity)	J
balf_cluster_gene_085231_1	610130.Closa_3005	gnl|BL_ORD_ID|3272845 610130.Closa_3005	454.521	1.71541e-157	57.22	acyl-CoA dehydrogenase	I
balf_cluster_gene_025259_1	234621.RER_29080	gnl|BL_ORD_ID|5196166 234621.RER_29080	672.544	0	99.41	Nudix hydrolase	L
balf_cluster_gene_123634_1	562971.HMPREF0005_05724	gnl|BL_ORD_ID|13842188 562971.HMPREF0005_05724	650.203	0	99.69
balf_cluster_gene_068883_1	658664.HMPREF1004_01160	gnl|BL_ORD_ID|14817208 658664.HMPREF1004_01160	716.072	0	90.07
balf_cluster_gene_057583_1	638301.HMPREF0444_0770	gnl|BL_ORD_ID|2635634 638301.HMPREF0444_0770	752.281	0	93.75	Cell Division Protein	D
balf_cluster_gene_231347_1	997353.HMPREF9144_1958	gnl|BL_ORD_ID|8558900 997353.HMPREF9144_1958	660.218	0	98.78	Membrane	S
balf_cluster_gene_115231_1	266835.mlr0102	gnl|BL_ORD_ID|7532156 266835.mlr0102	736.873	0	83.61	cysteine desulfurase	E
balf_cluster_gene_053464_1	888056.HMPREF9062_1017	gnl|BL_ORD_ID|1729957 888056.HMPREF9062_1017	581.637	0	87.46	DNA-dependent RNA polymerase catalyzes the transcription of DNA into RNA using the four ribonucleoside triphosphates as substrates (By similarity)	K
balf_cluster_gene_124056_1	392499.Swit_4732	gnl|BL_ORD_ID|3859445 392499.Swit_4732	517.309	0	79.5	Fructose-1,6-bisphosphatase	G
balf_cluster_gene_181909_1	1112856.MPNA4740	gnl|BL_ORD_ID|11597510 1112856.MPNA4740	772.696	0	100
balf_cluster_gene_202908_1	997353.HMPREF9144_0245	gnl|BL_ORD_ID|8558250 997353.HMPREF9144_0245	693.345	0	98.81	Nad-dependent epimerase dehydratase	M
balf_cluster_gene_192457_1	889204.HMPREF9423_0968	gnl|BL_ORD_ID|11220939 889204.HMPREF9423_0968	801.586	0	93.57
balf_cluster_gene_060108_1	469599.FSAG_01769	gnl|BL_ORD_ID|13992621 469599.FSAG_01769	693.345	0	98.55
balf_cluster_gene_181631_1	700598.Niako_2221	gnl|BL_ORD_ID|8364168 700598.Niako_2221	503.442	1.05596e-175	61.68	alpha-l-fucosidase	G
balf_cluster_gene_070492_1	452662.SJA_C1-20700	gnl|BL_ORD_ID|6482453 452662.SJA_C1-20700	687.182	0	86.63	acyl-CoA dehydrogenase	I
balf_cluster_gene_034343_1	402626.Rpic_3558	gnl|BL_ORD_ID|5589217 402626.Rpic_3558	592.423	0	88.96	Catalyzes the NADPH-dependent reduction of ketopantoate into pantoic acid (By similarity)	H
balf_cluster_gene_133863_1	639283.Snov_0193	gnl|BL_ORD_ID|6266522 639283.Snov_0193	231.106	2.74147e-71	40.37	oxidoreductase	S
balf_cluster_gene_166403_1	317655.Sala_1378	gnl|BL_ORD_ID|255125 317655.Sala_1378	419.468	1.42166e-143	58.93	parallel beta-helix repeat protein	S
balf_cluster_gene_097664_1	685035.CbatJ_010100007576	gnl|BL_ORD_ID|7006927 685035.CbatJ_010100007576	171.785	2.88831e-47	35.49	Phospholipase	M
balf_cluster_gene_170797_1	411466.ACTODO_00378	gnl|BL_ORD_ID|1771270 411466.ACTODO_00378	766.918	0	90.31	major facilitator Superfamily	G
balf_cluster_gene_128723_1	395963.Bind_1499	gnl|BL_ORD_ID|2248693 395963.Bind_1499	221.09	1.91512e-66	36.72	NA	S
balf_cluster_gene_016369_1	553201.ROTMU0001_0122	gnl|BL_ORD_ID|9779490 553201.ROTMU0001_0122	657.136	0	98.52
balf_cluster_gene_036909_1	997352.HMPREF9419_0217	gnl|BL_ORD_ID|4386304 997352.HMPREF9419_0217	516.924	0	75.15	site-specific DNA-methyltransferase (adenine-specific) activity	L
balf_cluster_gene_076947_1	546273.VEIDISOL_01127	gnl|BL_ORD_ID|4288779 546273.VEIDISOL_01127	811.601	0	99.48	Leucyl-trna synthetase	J
balf_cluster_gene_202796_1	243275.TDE2454	gnl|BL_ORD_ID|7802345 243275.TDE2454	557.37	0	81.58	NA	S
balf_cluster_gene_092379_1	596309.RHOER0001_1681	gnl|BL_ORD_ID|9824226 596309.RHOER0001_1681	746.888	0	97.36
balf_cluster_gene_170074_1	888059.HMPREF9071_1422	gnl|BL_ORD_ID|4195934 888059.HMPREF9071_1422	678.322	0	95.77	PKD domain	S
balf_cluster_gene_055809_1	441620.Mpop_2861	gnl|BL_ORD_ID|6958360 441620.Mpop_2861	790.415	0	98.76	ABC transporter	V
balf_cluster_gene_034870_1	431947.PGN_2006	gnl|BL_ORD_ID|9396396 431947.PGN_2006	607.446	0	71.97	Nicotinate phosphoribosyltransferase	H
balf_cluster_gene_205040_1	546268.NEISUBOT_05341	gnl|BL_ORD_ID|3025782 546268.NEISUBOT_05341	804.668	0	98.3	Polysaccharide biosynthesis protein	M
balf_cluster_gene_026800_1	317655.Sala_0388	gnl|BL_ORD_ID|254963 317655.Sala_0388	170.629	1.45749e-48	22.45	NA	S
balf_cluster_gene_111534_1	525260.HMPREF0276_1875	gnl|BL_ORD_ID|2135352 525260.HMPREF0276_1875	454.136	2.39438e-158	64.77	Specifically methylates the N4 position of cytidine in position 1402 (C1402) of 16S rRNA (By similarity)	M
balf_cluster_gene_129782_1	658659.HMPREF0983_04177	gnl|BL_ORD_ID|8471005 658659.HMPREF0983_04177	377.096	1.89914e-129	52.91	Retrotransposon protein	L
balf_cluster_gene_109058_1	411466.ACTODO_01349	gnl|BL_ORD_ID|1771453 411466.ACTODO_01349	778.859	0	97.72	Amp-dependent synthetase and ligase	I
balf_cluster_gene_193415_1	596320.NEIFL0001_1133	gnl|BL_ORD_ID|890230 596320.NEIFL0001_1133	792.341	0	96.7	Acetylornithine aminotransferase	E
balf_cluster_gene_049785_1	314266.SKA58_17952	gnl|BL_ORD_ID|8819447 314266.SKA58_17952	166.392	1.24449e-47	24.07	Ompa motb domain protein	M
balf_cluster_gene_036980_1	509169.xccb100_1849	gnl|BL_ORD_ID|11440484 509169.xccb100_1849	729.169	0	86.19
balf_cluster_gene_220550_1	862908.BMS_3020	gnl|BL_ORD_ID|1502325 862908.BMS_3020	615.92	0	70.36	purine NTP-dependent helicase activity	L
balf_cluster_gene_198315_1	545694.TREPR_0340	gnl|BL_ORD_ID|1541671 545694.TREPR_0340	418.313	5.28779e-140	53.93	asparagine synthetase	E
balf_cluster_gene_141163_1	228405.HNE_0516	gnl|BL_ORD_ID|7262610 228405.HNE_0516	650.973	0	73.48	acyl-CoA dehydrogenase	I
balf_cluster_gene_084403_1	706436.HMPREF9074_01856	gnl|BL_ORD_ID|4309585 706436.HMPREF9074_01856	757.288	0	98.45	homoserine dehydrogenase	E
balf_cluster_gene_072294_1	879309.HMPREF9199_1623	gnl|BL_ORD_ID|1835228 879309.HMPREF9199_1623	762.296	0	97.38	UDP-N-acetylglucosamine 2-epimerase	M
balf_cluster_gene_014212_1	979556.MTES_0297	gnl|BL_ORD_ID|6346274 979556.MTES_0297	645.58	0	89.15	GTPase that associates with the 50S ribosomal subunit and may have a role during protein synthesis or ribosome biogenesis (By similarity)	S
balf_cluster_gene_214419_1	749219.MCR_1182	gnl|BL_ORD_ID|12939844 749219.MCR_1182	382.874	1.65689e-130	55
balf_cluster_gene_160412_1	546270.GEMHA0001_0950	gnl|BL_ORD_ID|3353505 546270.GEMHA0001_0950	811.216	0	98.76	The beta subunit is responsible for the synthesis of L- tryptophan from indole and L-serine (By similarity)	E
balf_cluster_gene_156646_1	114615.BRADO5842	gnl|BL_ORD_ID|5758674 114615.BRADO5842	559.681	0	82.32	extra-cytoplasmic solute receptor family protein	S
balf_cluster_gene_224069_1	562971.HMPREF0005_00495	gnl|BL_ORD_ID|13841749 562971.HMPREF0005_00495	795.808	0	99.74
balf_cluster_gene_082892_1	706433.HMPREF9430_01925	gnl|BL_ORD_ID|2353919 706433.HMPREF9430_01925	658.292	0	91.52	Aldolase	E
balf_cluster_gene_016210_1	767100.HMPREF9126_0641	gnl|BL_ORD_ID|4547941 767100.HMPREF9126_0641	768.459	0	98.68	damaged site, the DNA wraps around one UvrB monomer. DNA wrap is dependent on ATP binding by UvrB and probably causes local melting of the DNA helix, facilitating insertion of UvrB beta-hairpin between the DNA strands. Then UvrB probes one DNA strand for the presence of a lesion. If a lesion is found the UvrA subunits dissociate and the UvrB-DNA preincision complex is formed. This complex is subs…	L
balf_cluster_gene_143231_1	596315.HMPREF0634_1157	gnl|BL_ORD_ID|5780491 596315.HMPREF0634_1157	754.977	0	95.96	repeat-containing protein	S
balf_cluster_gene_113822_1	1002339.HMPREF9373_2078	gnl|BL_ORD_ID|2810293 1002339.HMPREF9373_2078	598.201	0	74.67	Cell Division Protein	D
balf_cluster_gene_096955_1	888746.HMPREF9180_0415	gnl|BL_ORD_ID|3703069 888746.HMPREF9180_0415	779.63	0	97.25	Major Facilitator	G
balf_cluster_gene_217944_1	228405.HNE_2441	gnl|BL_ORD_ID|7265263 228405.HNE_2441	747.273	0	85	acyl-CoA dehydrogenase	I
balf_cluster_gene_167780_1	411466.ACTODO_02115	gnl|BL_ORD_ID|1772306 411466.ACTODO_02115	673.315	0	92.53	mannose-1-phosphate guanylyltransferase activity	M
balf_cluster_gene_169013_1	411466.ACTODO_00089	gnl|BL_ORD_ID|1772186 411466.ACTODO_00089	608.986	0	77.07	permease	F
balf_cluster_gene_049260_1	441620.Mpop_0885	gnl|BL_ORD_ID|6959113 441620.Mpop_0885	632.484	0	98.46	Catalyzes the synthesis of dihydrouridine a modified base found in the D-loop of most tRNAs (By similarity)	J
balf_cluster_gene_197578_1	476272.RUMHYD_01090	gnl|BL_ORD_ID|9413464 476272.RUMHYD_01090	169.474	2.67752e-45	26.2	glucose-6-phosphate isomerase activity	G
balf_cluster_gene_055461_1	596309.RHOER0001_0615	gnl|BL_ORD_ID|9822377 596309.RHOER0001_0615	814.683	0	99.53
balf_cluster_gene_029185_1	997348.HMPREF9418_2522	gnl|BL_ORD_ID|10894804 997348.HMPREF9418_2522	357.451	2.04505e-122	52.16
balf_cluster_gene_042119_1	546270.GEMHA0001_1228	gnl|BL_ORD_ID|3352527 546270.GEMHA0001_1228	620.928	0	89.94	NA	S
balf_cluster_gene_039180_1	411466.ACTODO_01018	gnl|BL_ORD_ID|1773002 411466.ACTODO_01018	725.317	0	99.73	domain protein	S
balf_cluster_gene_139951_1	1037409.BJ6T_08500	gnl|BL_ORD_ID|8418944 1037409.BJ6T_08500	582.022	0	85.49	extra-cytoplasmic solute receptor family protein	S
balf_cluster_gene_050796_1	450851.PHZ_c3251	gnl|BL_ORD_ID|7727884 450851.PHZ_c3251	400.593	5.58349e-138	62.27	glucokinase (EC 2.7.1.2)	G
balf_cluster_gene_213500_1	323261.Noc_1610	gnl|BL_ORD_ID|5533916 323261.Noc_1610	98.2117	6.66278e-20	21.39	NA	S
balf_cluster_gene_061556_1	441620.Mpop_2958	gnl|BL_ORD_ID|6960247 441620.Mpop_2958	700.279	0	99.17	protein-glutamate methylesterase activity	T
balf_cluster_gene_137658_1	862965.PARA_19370	gnl|BL_ORD_ID|3062509 862965.PARA_19370	697.967	0	90.8	Dehydrogenase	C
balf_cluster_gene_068379_1	548476.CaurA7_010100006893	gnl|BL_ORD_ID|793408 548476.CaurA7_010100006893	260.766	3.33901e-83	44.24	ROK family	G
balf_cluster_gene_217312_1	411466.ACTODO_02052	gnl|BL_ORD_ID|1771241 411466.ACTODO_02052	610.142	0	91.3	Glycosyl transferase	M
balf_cluster_gene_001795_1	1082931.KKY_3612	gnl|BL_ORD_ID|9591113 1082931.KKY_3612	630.558	0	81.64	Integrase	L
balf_cluster_gene_030250_1	553219.CAMSH0001_1867	gnl|BL_ORD_ID|7357986 553219.CAMSH0001_1867	734.561	0	96.87	Exhibits a very high intrinsic GTPase hydrolysis rate. Involved in the addition of a carboxymethylaminomethyl (cmnm) group at the wobble position (U34) of certain tRNAs, forming tRNA- cmnm(5)s(2)U34 (By similarity)	S
balf_cluster_gene_193412_1	944564.HMPREF9200_1560	gnl|BL_ORD_ID|4065555 944564.HMPREF9200_1560	244.973	2.72957e-76	43.52
balf_cluster_gene_184127_1	709797.CSIRO_3007	gnl|BL_ORD_ID|7183346 709797.CSIRO_3007	769.615	0	89.02	cyclopropane-fatty-acyl-phospholipid synthase	M
balf_cluster_gene_082330_1	525268.HMPREF0308_1651	gnl|BL_ORD_ID|9579773 525268.HMPREF0308_1651	504.982	3.2273e-178	64.58	NA	S
balf_cluster_gene_056679_1	546273.VEIDISOL_00165	gnl|BL_ORD_ID|4289124 546273.VEIDISOL_00165	637.491	0	97.64	domain protein	U:W
balf_cluster_gene_178732_1	649742.HMPREF0970_01706	gnl|BL_ORD_ID|14221239 649742.HMPREF0970_01706	427.172	6.11219e-147	71.87
balf_cluster_gene_209309_1	562971.HMPREF0005_01576	gnl|BL_ORD_ID|13843064 562971.HMPREF0005_01576	619.772	0	85.44
balf_cluster_gene_122257_1	450851.PHZ_c3470	gnl|BL_ORD_ID|7726338 450851.PHZ_c3470	562.762	0	80.06	Negative regulator of class I heat shock genes (grpE- dnaK-dnaJ and groELS operons). Prevents heat-shock induction of these operons (By similarity)	K
balf_cluster_gene_164984_1	411461.DORFOR_02383	gnl|BL_ORD_ID|8837468 411461.DORFOR_02383	657.136	0	78.26	cytosine purines, uracil, thiamine, allantoin permease	F:H
balf_cluster_gene_141517_1	525257.HMPREF0204_15088	gnl|BL_ORD_ID|5162224 525257.HMPREF0204_15088	553.518	0	77.78	synthase	H
balf_cluster_gene_106825_1	888833.HMPREF9421_1017	gnl|BL_ORD_ID|5955924 888833.HMPREF9421_1017	726.472	0	94.92	Cell Division Protein	D
balf_cluster_gene_161947_1	536019.Mesop_0791	gnl|BL_ORD_ID|9616807 536019.Mesop_0791	358.221	5.86076e-122	58.19	Catalyzes the dephosphorylation of undecaprenyl diphosphate (UPP). Confers resistance to bacitracin (By similarity)	V
balf_cluster_gene_033356_1	596309.RHOER0001_2241	gnl|BL_ORD_ID|9824787 596309.RHOER0001_2241	726.087	0	98.88
balf_cluster_gene_209680_1	441620.Mpop_4463	gnl|BL_ORD_ID|6962340 441620.Mpop_4463	714.916	0	99.44	Histidine kinase	T
balf_cluster_gene_219442_1	658664.HMPREF1004_01029	gnl|BL_ORD_ID|14817377 658664.HMPREF1004_01029	739.184	0	95.8
balf_cluster_gene_008208_1	862965.PARA_15290	gnl|BL_ORD_ID|3062854 862965.PARA_15290	776.933	0	97.69	Succinyl-CoA synthetase subunit beta	C
balf_cluster_gene_020942_1	546268.NEISUBOT_03551	gnl|BL_ORD_ID|3026411 546268.NEISUBOT_03551	819.691	0	96.81	2-oxoglutarate dehydrogenase, E1	C
balf_cluster_gene_065285_1	1050720.Agau_C101392	gnl|BL_ORD_ID|777644 1050720.Agau_C101392	388.267	3.56711e-132	54.8	Platelet-activating factor acetylhydrolase plasma intracellular isoform II	S
balf_cluster_gene_076143_1	742723.HMPREF9477_01626	gnl|BL_ORD_ID|4291442 742723.HMPREF9477_01626	191.045	1.10143e-54	27.86	protease	M
balf_cluster_gene_197309_1	997353.HMPREF9144_0507	gnl|BL_ORD_ID|8558845 997353.HMPREF9144_0507	638.647	0	93.56	receptor	P
balf_cluster_gene_049876_1	1007104.SUS17_1744	gnl|BL_ORD_ID|1297584 1007104.SUS17_1744	166.777	1.20089e-46	38.15	glycerophosphoryl diester phosphodiesterase	C
balf_cluster_gene_030699_1	977880.RALTA_B1268	gnl|BL_ORD_ID|3523503 977880.RALTA_B1268	506.138	2.30654e-176	70.95	Histidine kinase	T
balf_cluster_gene_009104_1	411466.ACTODO_02175	gnl|BL_ORD_ID|1772667 411466.ACTODO_02175	672.544	0	97.49
balf_cluster_gene_231262_1	547045.NEISICOT_01454	gnl|BL_ORD_ID|6154475 547045.NEISICOT_01454	719.153	0	97.79	(ABC) transporter	E
balf_cluster_gene_098118_1	349106.PsycPRwf_1598	gnl|BL_ORD_ID|8808980 349106.PsycPRwf_1598	476.093	7.35193e-167	64.04	N-acetylglutamate semialdehyde dehydrogenase	E
balf_cluster_gene_135480_1	638301.HMPREF0444_1770	gnl|BL_ORD_ID|2636957 638301.HMPREF0444_1770	523.087	0	71.23	glycerophosphoryl diester phosphodiesterase	C
balf_cluster_gene_175578_1	596329.HMPREF0631_0530	gnl|BL_ORD_ID|6462433 596329.HMPREF0631_0530	303.523	1.26372e-97	45.15	NA	S
balf_cluster_gene_042116_1	244592.SADFL11_3610	gnl|BL_ORD_ID|8072805 244592.SADFL11_3610	340.887	4.23656e-112	48.07	Transcriptional regulator	K
balf_cluster_gene_059293_1	1030843.PGTDC60_0039	gnl|BL_ORD_ID|14460916 1030843.PGTDC60_0039	771.155	0	86.15
balf_cluster_gene_117318_1	679190.HMPREF0650_2441	gnl|BL_ORD_ID|2659716 679190.HMPREF0650_2441	240.736	4.42757e-74	36.92
balf_cluster_gene_226690_1	479436.Vpar_0209	gnl|BL_ORD_ID|8742887 479436.Vpar_0209	743.421	0	99.44	Catalyzes the reduction of hydroxylamine to form NH(3) and H(2)O (By similarity)	C
balf_cluster_gene_205547_1	562981.HMPREF0428_01726	gnl|BL_ORD_ID|931621 562981.HMPREF0428_01726	756.133	0	98.67	Catalyzes the reversible conversion of 2- phosphoglycerate into phosphoenolpyruvate. It is essential for the degradation of carbohydrates via glycolysis (By similarity)	G
balf_cluster_gene_069729_1	596309.RHOER0001_1182	gnl|BL_ORD_ID|9823071 596309.RHOER0001_1182	796.579	0	99.76
balf_cluster_gene_182320_1	866778.HMPREF9684_1833	gnl|BL_ORD_ID|11624985 866778.HMPREF9684_1833	732.25	0	99.17
balf_cluster_gene_046310_1	1031710.OCA4_c13190	gnl|BL_ORD_ID|13814416 1031710.OCA4_c13190	694.501	0	87.93
balf_cluster_gene_062350_1	431947.PGN_1729	gnl|BL_ORD_ID|9394370 431947.PGN_1729	160.614	7.45279e-44	27.3	#NAME?	S
balf_cluster_gene_098191_1	441620.Mpop_1769	gnl|BL_ORD_ID|6958267 441620.Mpop_1769	763.837	0	99.73	radical SAM domain protein	S
balf_cluster_gene_168787_1	521095.Apar_1083	gnl|BL_ORD_ID|5490425 521095.Apar_1083	627.476	0	91.47	tatd family	L
balf_cluster_gene_189868_1	997353.HMPREF9144_2738	gnl|BL_ORD_ID|8557830 997353.HMPREF9144_2738	751.51	0	99.19
balf_cluster_gene_040641_1	562971.HMPREF0005_01735	gnl|BL_ORD_ID|13841082 562971.HMPREF0005_01735	581.252	0	87.46
balf_cluster_gene_007714_1	888828.HMPREF9417_1174	gnl|BL_ORD_ID|10730442 888828.HMPREF9417_1174	738.413	0	99.18
balf_cluster_gene_184400_1	553201.ROTMU0001_1607	gnl|BL_ORD_ID|9779681 553201.ROTMU0001_1607	240.736	3.14372e-70	38.53
balf_cluster_gene_069429_1	565050.CCNA_02207	gnl|BL_ORD_ID|14114158 565050.CCNA_02207	385.185	4.53025e-132	65.95
balf_cluster_gene_058823_1	224911.bll0989	gnl|BL_ORD_ID|7501280 224911.bll0989	571.237	0	83.99	(ABC) transporter	E
balf_cluster_gene_159538_1	565050.CCNA_02457	gnl|BL_ORD_ID|14114408 565050.CCNA_02457	546.584	0	79.76
balf_cluster_gene_080034_1	649742.HMPREF0970_01847	gnl|BL_ORD_ID|14220079 649742.HMPREF0970_01847	630.558	0	96.92
balf_cluster_gene_019076_1	562971.HMPREF0005_01927	gnl|BL_ORD_ID|13843890 562971.HMPREF0005_01927	641.728	0	99.69
balf_cluster_gene_073753_1	279238.Saro_1282	gnl|BL_ORD_ID|3555611 279238.Saro_1282	814.298	0	95.12	isocitrate dehydrogenase (NADp)	C
balf_cluster_gene_233565_1	706433.HMPREF9430_00051	gnl|BL_ORD_ID|2354657 706433.HMPREF9430_00051	840.106	0	96.24	cysteine transport	V
balf_cluster_gene_143011_1	658664.HMPREF1004_01599	gnl|BL_ORD_ID|14816953 658664.HMPREF1004_01599	525.013	0	79.7
balf_cluster_gene_164037_1	525246.HMPREF0058_1081	gnl|BL_ORD_ID|9180863 525246.HMPREF0058_1081	412.149	1.31976e-141	58.33	organization protein	S
balf_cluster_gene_082150_1	317655.Sala_1832	gnl|BL_ORD_ID|255843 317655.Sala_1832	564.688	0	71.94	purine NTP-dependent helicase activity	L
balf_cluster_gene_211947_1	1007104.SUS17_3682	gnl|BL_ORD_ID|1297935 1007104.SUS17_3682	697.197	0	88.6	Catalyzes the reversible conversion of 3- phosphohydroxypyruvate to phosphoserine and of 3-hydroxy-2-oxo-4- phosphonooxybutanoate to phosphohydroxythreonine (By similarity)	E
balf_cluster_gene_142207_1	411466.ACTODO_02112	gnl|BL_ORD_ID|1772313 411466.ACTODO_02112	685.641	0	86.29	succinyl-diaminopimelate desuccinylase activity	E
balf_cluster_gene_134942_1	441620.Mpop_3575	gnl|BL_ORD_ID|6959376 441620.Mpop_3575	531.176	0	75.07	invasion associated locus B	S
balf_cluster_gene_149737_1	203119.Cthe_0159	gnl|BL_ORD_ID|873989 203119.Cthe_0159	231.491	1.64353e-70	38.67	transposase	L
balf_cluster_gene_210666_1	411466.ACTODO_01029	gnl|BL_ORD_ID|1772580 411466.ACTODO_01029	685.256	0	86.25	integral membrane protein	S
balf_cluster_gene_127143_1	441620.Mpop_1556	gnl|BL_ORD_ID|6960811 441620.Mpop_1556	692.189	0	95.72	Glycosyl transferase, family 2	M
balf_cluster_gene_167296_1	888052.HMPREF9006_2065	gnl|BL_ORD_ID|8697364 888052.HMPREF9006_2065	627.091	0	83.7	transposase	L
balf_cluster_gene_037266_1	562971.HMPREF0005_03636	gnl|BL_ORD_ID|13841974 562971.HMPREF0005_03636	669.848	0	99.7
balf_cluster_gene_129593_1	546263.NEIELOOT_01525	gnl|BL_ORD_ID|5509843 546263.NEIELOOT_01525	691.804	0	98.85	Potassium proton antiporter	P
balf_cluster_gene_140632_1	546263.NEIELOOT_01844	gnl|BL_ORD_ID|5509727 546263.NEIELOOT_01844	806.209	0	99.49	cystathionine	E
balf_cluster_gene_220825_1	316055.RPE_2545	gnl|BL_ORD_ID|2092500 316055.RPE_2545	798.89	0	89.7	lipoprotein releasing system transmembrane protein	M
balf_cluster_gene_093850_1	596309.RHOER0001_2347	gnl|BL_ORD_ID|9821260 596309.RHOER0001_2347	762.296	0	97.68
balf_cluster_gene_061771_1	562973.HMPREF0059_00116	gnl|BL_ORD_ID|12555249 562973.HMPREF0059_00116	530.02	0	76.59
balf_cluster_gene_174845_1	640511.BC1002_6713	gnl|BL_ORD_ID|420760 640511.BC1002_6713	631.713	0	79.8	Citrate utilization protein b	S
balf_cluster_gene_018883_1	441620.Mpop_0210	gnl|BL_ORD_ID|6960242 441620.Mpop_0210	559.681	0	93.51	NA	P
balf_cluster_gene_205831_1	641149.HMPREF9016_01480	gnl|BL_ORD_ID|6001723 641149.HMPREF9016_01480	733.791	0	97.78	alpha beta hydrolase fold	I
balf_cluster_gene_079398_1	441620.Mpop_3566	gnl|BL_ORD_ID|6959785 441620.Mpop_3566	841.262	0	99.76	formamidase	C
balf_cluster_gene_002754_1	562971.HMPREF0005_00480	gnl|BL_ORD_ID|13841734 562971.HMPREF0005_00480	679.863	0	98.81
balf_cluster_gene_069925_1	864567.HMPREF8571_1421	gnl|BL_ORD_ID|3422864 864567.HMPREF8571_1421	809.29	0	97.08	ATP-dependent specificity component of the Clp protease. It directs the protease to specific substrates. Can perform chaperone functions in the absence of ClpP (By similarity)	O
balf_cluster_gene_055732_1	765698.Mesci_0321	gnl|BL_ORD_ID|2840707 765698.Mesci_0321	540.806	0	79.94	malate L-lactate dehydrogenase	C
balf_cluster_gene_040503_1	553201.ROTMU0001_0677	gnl|BL_ORD_ID|9778942 553201.ROTMU0001_0677	661.759	0	100
balf_cluster_gene_234677_1	1037409.BJ6T_37580	gnl|BL_ORD_ID|8425459 1037409.BJ6T_37580	761.525	0	95.24	Catalyzes the formation of S-adenosylmethionine from methionine and ATP	H
balf_cluster_gene_094264_1	392499.Swit_1203	gnl|BL_ORD_ID|3861055 392499.Swit_1203	441.81	3.34542e-154	72.39	Agmatine deiminase	E
balf_cluster_gene_143018_1	596320.NEIFL0001_1335	gnl|BL_ORD_ID|891541 596320.NEIFL0001_1335	707.597	0	94.13	CRISPR-associated helicase, cas3	L
balf_cluster_gene_001113_1	428406.Rpic12D_3322	gnl|BL_ORD_ID|13822781 428406.Rpic12D_3322	657.522	0	90.34
balf_cluster_gene_083546_1	862965.PARA_10990	gnl|BL_ORD_ID|3062654 862965.PARA_10990	566.614	0	99.07	Cell envelope integrity inner membrane protein TolA	M
balf_cluster_gene_068382_1	665937.HMPREF1011_02099	gnl|BL_ORD_ID|13310692 665937.HMPREF1011_02099	353.599	2.79166e-112	46.88
balf_cluster_gene_146043_1	1007104.SUS17_3070	gnl|BL_ORD_ID|1297763 1007104.SUS17_3070	536.954	0	76.38	Glycosyl transferase, family 2	M
balf_cluster_gene_108550_1	596320.NEIFL0001_1269	gnl|BL_ORD_ID|891899 596320.NEIFL0001_1269	712.99	0	96.35	cell wall formation (By similarity)	M
balf_cluster_gene_174906_1	536019.Mesop_2033	gnl|BL_ORD_ID|9615740 536019.Mesop_2033	561.992	0	76.23	polyamine binding	E
balf_cluster_gene_195302_1	983920.Y88_3807	gnl|BL_ORD_ID|19084 983920.Y88_3807	609.372	0	87.03	Catalyzes the condensation of the acetyl group of acetyl-CoA with 3-methyl-2-oxobutanoate (2-oxoisovalerate) to form 3-carboxy-3-hydroxy-4-methylpentanoate (2-isopropylmalate) (By similarity)	E
balf_cluster_gene_106436_1	888057.HMPREF9064_1782	gnl|BL_ORD_ID|7452770 888057.HMPREF9064_1782	653.67	0	100	Aaa atpase	S
balf_cluster_gene_004383_1	658664.HMPREF1004_01095	gnl|BL_ORD_ID|14817283 658664.HMPREF1004_01095	686.797	0	97.46
balf_cluster_gene_233007_1	547045.NEISICOT_01294	gnl|BL_ORD_ID|6154468 547045.NEISICOT_01294	720.309	0	99.44	Permease yjgp yjgq family	S
balf_cluster_gene_024761_1	313598.MED152_09065	gnl|BL_ORD_ID|4855919 313598.MED152_09065	337.035	6.51222e-112	48.49	Transcriptional Regulator AraC Family	K
balf_cluster_gene_125716_1	411477.PARMER_00160	gnl|BL_ORD_ID|3132466 411477.PARMER_00160	289.271	2.0032e-91	39	Protein of unknown function (DUF2851)	S
balf_cluster_gene_109892_1	411466.ACTODO_00735	gnl|BL_ORD_ID|1771876 411466.ACTODO_00735	748.429	0	97.36	DNA polymerase processivity factor activity	L
balf_cluster_gene_102386_1	888052.HMPREF9006_1941	gnl|BL_ORD_ID|8698940 888052.HMPREF9006_1941	637.876	0	90.2	Guanylate Cyclase	T
balf_cluster_gene_121983_1	562971.HMPREF0005_01289	gnl|BL_ORD_ID|13842778 562971.HMPREF0005_01289	815.068	0	99.75
balf_cluster_gene_231796_1	658664.HMPREF1004_02667	gnl|BL_ORD_ID|14818974 658664.HMPREF1004_02667	711.064	0	99.43
balf_cluster_gene_001614_1	743721.Psesu_0354	gnl|BL_ORD_ID|612661 743721.Psesu_0354	438.728	4.27785e-147	57.03	receptor	P
balf_cluster_gene_211196_1	979556.MTES_1691	gnl|BL_ORD_ID|6346121 979556.MTES_1691	385.571	2.56714e-131	57.35
balf_cluster_gene_067411_1	563045.CTS44_24868	gnl|BL_ORD_ID|12461234 563045.CTS44_24868	85.8853	9.03174e-16	19.79
balf_cluster_gene_061002_1	546273.VEIDISOL_01435	gnl|BL_ORD_ID|4289678 546273.VEIDISOL_01435	736.873	0	99.46	NA	S
balf_cluster_gene_035149_1	649742.HMPREF0970_01783	gnl|BL_ORD_ID|14220016 649742.HMPREF0970_01783	681.404	0	87.35
balf_cluster_gene_135277_1	596315.HMPREF0634_1359	gnl|BL_ORD_ID|5780026 596315.HMPREF0634_1359	802.357	0	99.5	type ii secretion system protein e	U
balf_cluster_gene_001029_1	391600.BBAL3_1207	gnl|BL_ORD_ID|6627596 391600.BBAL3_1207	430.639	6.04905e-149	65.68	(LipO)protein	H
balf_cluster_gene_064180_1	267608.RSc1712	gnl|BL_ORD_ID|2085015 267608.RSc1712	851.662	0	98.59	ATP-dependent specificity component of the Clp protease. It directs the protease to specific substrates. Can perform chaperone functions in the absence of ClpP (By similarity)	O
balf_cluster_gene_055325_1	553218.CAMRE0001_3201	gnl|BL_ORD_ID|3465178 553218.CAMRE0001_3201	656.751	0	95.51	cysteine desulfurase	E
balf_cluster_gene_230641_1	402626.Rpic_1372	gnl|BL_ORD_ID|5591613 402626.Rpic_1372	691.034	0	90.41	8-Amino-7-oxononanoate synthase	H
balf_cluster_gene_136505_1	682795.AciX8_3198	gnl|BL_ORD_ID|5193676 682795.AciX8_3198	323.939	5.07545e-106	44.16	peptidase'	M
balf_cluster_gene_005738_1	680646.RMDY18_06050	gnl|BL_ORD_ID|6599671 680646.RMDY18_06050	623.239	0	96.89	Catalyzes the conversion of the cyclic tetrahydrodipicolinate (THDP) into the acyclic N-succinyl-L-2- amino-6-oxopimelate using succinyl-CoA (By similarity)	E
balf_cluster_gene_000241_1	765120.HMPREF9618_01964	gnl|BL_ORD_ID|14866041 765120.HMPREF9618_01964	642.884	0	100
balf_cluster_gene_136336_1	706436.HMPREF9074_06157	gnl|BL_ORD_ID|4307487 706436.HMPREF9074_06157	771.541	0	97.4	cysteine desulfurase	E
balf_cluster_gene_001959_1	649742.HMPREF0970_02053	gnl|BL_ORD_ID|14219951 649742.HMPREF0970_02053	707.212	0	96.69
balf_cluster_gene_187536_1	997353.HMPREF9144_0689	gnl|BL_ORD_ID|8558264 997353.HMPREF9144_0689	728.013	0	99.71	protease	M
balf_cluster_gene_200986_1	258594.RPA2984	gnl|BL_ORD_ID|1490659 258594.RPA2984	289.656	1.69757e-92	47.96	Histidine kinase	T
balf_cluster_gene_138787_1	378806.STAUR_5702	gnl|BL_ORD_ID|4860898 378806.STAUR_5702	292.738	2.88557e-91	42.75	Protein of unknown function (DUF1800)	S
balf_cluster_gene_172989_1	649742.HMPREF0970_00779	gnl|BL_ORD_ID|14221778 649742.HMPREF0970_00779	622.083	0	97.2
balf_cluster_gene_152156_1	521095.Apar_0420	gnl|BL_ORD_ID|5490614 521095.Apar_0420	796.964	0	95.3	aspartyl-trna synthetase	J
balf_cluster_gene_026437_1	411465.PEPMIC_01458	gnl|BL_ORD_ID|3752027 411465.PEPMIC_01458	794.267	0	99.5	phenylalanyl-tRNA synthetase (beta subunit)	J
balf_cluster_gene_175658_1	224911.bll2752	gnl|BL_ORD_ID|7500085 224911.bll2752	641.343	0	86.8	Glycosyl transferase (Group 1	M
balf_cluster_gene_112063_1	360104.CCC13826_2194	gnl|BL_ORD_ID|694027 360104.CCC13826_2194	842.032	0	99.76	Catalyzes the isomerization between 2-isopropylmalate and 3-isopropylmalate, via the formation of 2-isopropylmaleate (By similarity)	E
balf_cluster_gene_145575_1	596309.RHOER0001_1859	gnl|BL_ORD_ID|9824404 596309.RHOER0001_1859	741.11	0	98.39
balf_cluster_gene_186685_1	979556.MTES_1348	gnl|BL_ORD_ID|6345148 979556.MTES_1348	605.134	0	73.65	amidohydrolase	E
balf_cluster_gene_127992_1	553201.ROTMU0001_1544	gnl|BL_ORD_ID|9779981 553201.ROTMU0001_1544	618.616	0	86.57
balf_cluster_gene_051017_1	649742.HMPREF0970_01023	gnl|BL_ORD_ID|14221530 649742.HMPREF0970_01023	643.269	0	78.74
balf_cluster_gene_103290_1	546266.NEIMUCOT_06133	gnl|BL_ORD_ID|2484875 546266.NEIMUCOT_06133	719.539	0	97.74	Catalyzes the decarboxylation of four acetate groups of uroporphyrinogen-III to yield coproporphyrinogen-III (By similarity)	H
balf_cluster_gene_064738_1	979556.MTES_0640	gnl|BL_ORD_ID|6345020 979556.MTES_0640	682.945	0	84.54	Transcriptional regulator	K
balf_cluster_gene_223920_1	1037409.BJ6T_41580	gnl|BL_ORD_ID|8420492 1037409.BJ6T_41580	440.654	2.22916e-152	62.43	NA	S
balf_cluster_gene_013202_1	562971.HMPREF0005_01467	gnl|BL_ORD_ID|13842956 562971.HMPREF0005_01467	852.432	0	97.65
balf_cluster_gene_190958_1	857575.E9S_04077	gnl|BL_ORD_ID|13066670 857575.E9S_04077	548.125	0	65.55
balf_cluster_gene_139488_1	637911.AM305_00070	gnl|BL_ORD_ID|6699301 637911.AM305_00070	643.269	0	81.72	transglycosylase	M
balf_cluster_gene_220958_1	627192.SLG_21390	gnl|BL_ORD_ID|323169 627192.SLG_21390	546.584	0	68.7	Glycosyl transferase (Group 1	M
balf_cluster_gene_213408_1	62928.azo3594	gnl|BL_ORD_ID|7992306 62928.azo3594	355.14	1.61014e-119	48.84	Glycosyl transferase, family 2	M
balf_cluster_gene_036832_1	997830.HMPREF1124_1617	gnl|BL_ORD_ID|4484407 997830.HMPREF1124_1617	721.85	0	96.82	Serine protease	O
balf_cluster_gene_047031_1	706436.HMPREF9074_00487	gnl|BL_ORD_ID|4306971 706436.HMPREF9074_00487	727.243	0	98.33	Catalyzes the NADPH-dependent reduction of glutamyl- tRNA(Glu) to glutamate 1-semialdehyde (GSA) (By similarity)	H
balf_cluster_gene_023655_1	706433.HMPREF9430_02020	gnl|BL_ORD_ID|2353441 706433.HMPREF9430_02020	694.115	0	84.44	synthetase	S
balf_cluster_gene_021374_1	546264.NEIFLAOT_01574	gnl|BL_ORD_ID|4570335 546264.NEIFLAOT_01574	658.677	0	97.61	Required for the first step of histidine biosynthesis. May allow the feedback regulation of ATP phosphoribosyltransferase activity by histidine (By similarity)	E
balf_cluster_gene_160543_1	435832.HMPREF0604_00389	gnl|BL_ORD_ID|8432928 435832.HMPREF0604_00389	677.552	0	97.93	CRISPR (clustered regularly interspaced short palindromic repeat), is an adaptive immune system that provides protection against mobile genetic elements (viruses, transposable elements and conjugative plasmids). CRISPR clusters contain sequences complementary to antecedent mobile elements and target invading nucleic acids. CRISPR clusters are transcribed and processed into CRISPR RNA (crRNA). Act…	L
balf_cluster_gene_093521_1	316056.RPC_2393	gnl|BL_ORD_ID|6032338 316056.RPC_2393	860.522	0	98.82	ATP-dependent specificity component of the Clp protease. It directs the protease to specific substrates. Can perform chaperone functions in the absence of ClpP (By similarity)	O
balf_cluster_gene_159356_1	340322.cgR_0566	gnl|BL_ORD_ID|11436158 340322.cgR_0566	585.104	0	83.33
balf_cluster_gene_132602_1	224911.blr1106	gnl|BL_ORD_ID|7500131 224911.blr1106	670.618	0	85.82	Deoxycytidine triphosphate deaminase	F
balf_cluster_gene_108199_1	450749.HMPREF0874_01742	gnl|BL_ORD_ID|12296007 450749.HMPREF0874_01742	712.605	0	97.49
balf_cluster_gene_134402_1	523794.Lebu_2002	gnl|BL_ORD_ID|976592 523794.Lebu_2002	520.005	7.47516e-179	75.85	3'-5' exoribonuclease that releases 5'-nucleoside monophosphates and is involved in maturation of structured RNAs (By similarity)	K
balf_cluster_gene_208946_1	641118.OINT_1002178	gnl|BL_ORD_ID|6851220 641118.OINT_1002178	506.138	2.69952e-178	64.36	SMC domain protein	S
balf_cluster_gene_053518_1	655815.ZPR_2449	gnl|BL_ORD_ID|3092358 655815.ZPR_2449	344.354	7.65469e-107	47.62	TonB dependent receptor	P
balf_cluster_gene_049884_1	279238.Saro_2366	gnl|BL_ORD_ID|3557701 279238.Saro_2366	576.244	0	86.2	Catalyzes the condensation reaction of fatty acid synthesis by the addition to an acyl acceptor of two carbons from malonyl-ACP. Catalyzes the first condensation reaction which initiates fatty acid synthesis and may therefore play a role in governing the total rate of fatty acid production. Possesses both acetoacetyl-ACP synthase and acetyl transacylase activities. Its substrate specificity deter…	I
balf_cluster_gene_092971_1	312284.A20C1_10384	gnl|BL_ORD_ID|3802143 312284.A20C1_10384	402.519	8.06026e-138	56.82	Cytosine-specific methyltransferase	L
balf_cluster_gene_140664_1	391601.SSKA14_3734	gnl|BL_ORD_ID|14514271 391601.SSKA14_3734	642.884	0	87.85
balf_cluster_gene_017274_1	862965.PARA_11170	gnl|BL_ORD_ID|3062726 862965.PARA_11170	664.455	0	99.7	Periplasmic binding protein LacI transcriptional regulator	G
balf_cluster_gene_214462_1	393121.LMFG_02212	gnl|BL_ORD_ID|12942141 393121.LMFG_02212	495.738	2.65264e-173	59.49
balf_cluster_gene_215670_1	765698.Mesci_0591	gnl|BL_ORD_ID|2841003 765698.Mesci_0591	602.053	0	86.53	Monooxygenase	C
balf_cluster_gene_096046_1	742159.HMPREF0004_2548	gnl|BL_ORD_ID|5725668 742159.HMPREF0004_2548	342.813	4.48592e-114	61.48	NA	S
balf_cluster_gene_003367_1	649742.HMPREF0970_00433	gnl|BL_ORD_ID|14221999 649742.HMPREF0970_00433	761.525	0	91.75
balf_cluster_gene_197486_1	521095.Apar_1220	gnl|BL_ORD_ID|5491720 521095.Apar_1220	672.159	0	89.3	Transcriptional regulator	K
balf_cluster_gene_099853_1	316058.RPB_2858	gnl|BL_ORD_ID|6017745 316058.RPB_2858	444.121	1.67653e-151	62.72	cell wall	G
balf_cluster_gene_037883_1	435832.HMPREF0604_01524	gnl|BL_ORD_ID|8432593 435832.HMPREF0604_01524	206.453	5.47228e-64	42.73
balf_cluster_gene_004444_1	264198.Reut_B5477	gnl|BL_ORD_ID|5362227 264198.Reut_B5477	328.561	1.95852e-108	45.04
balf_cluster_gene_137840_1	887929.HMP0721_2420	gnl|BL_ORD_ID|480323 887929.HMP0721_2420	246.128	7.4944e-73	50.91	domain protein	S
balf_cluster_gene_068134_1	649742.HMPREF0970_00587	gnl|BL_ORD_ID|14221982 649742.HMPREF0970_00587	718.383	0	87.5
balf_cluster_gene_128697_1	760570.HMPREF0833_11192	gnl|BL_ORD_ID|13015370 760570.HMPREF0833_11192	715.301	0	98.84
balf_cluster_gene_190951_1	596309.RHOER0001_5339	gnl|BL_ORD_ID|9820620 596309.RHOER0001_5339	818.92	0	99.26
balf_cluster_gene_208093_1	905067.HMPREF9626_1483	gnl|BL_ORD_ID|14202056 905067.HMPREF9626_1483	837.025	0	99.53
balf_cluster_gene_033059_1	553206.CORTU0001_1844	gnl|BL_ORD_ID|12646439 553206.CORTU0001_1844	546.199	0	77.38
balf_cluster_gene_012237_1	441620.Mpop_2485	gnl|BL_ORD_ID|6958512 441620.Mpop_2485	676.396	0	99.11	pantothenate kinase activity	H
balf_cluster_gene_231699_1	562981.HMPREF0428_01455	gnl|BL_ORD_ID|933278 562981.HMPREF0428_01455	669.078	0	99.08	Dehydrogenase	C
balf_cluster_gene_024947_1	547045.NEISICOT_01817	gnl|BL_ORD_ID|6157002 547045.NEISICOT_01817	698.738	0	86.53	tryptophanyltRNA synthetase	J
balf_cluster_gene_208431_1	649742.HMPREF0970_00281	gnl|BL_ORD_ID|14220633 649742.HMPREF0970_00281	689.108	0	97.67
balf_cluster_gene_135288_1	565050.CCNA_00544	gnl|BL_ORD_ID|14112495 565050.CCNA_00544	697.967	0	86.48
balf_cluster_gene_166697_1	242231.NGO0553	gnl|BL_ORD_ID|10374259 242231.NGO0553	652.899	0	95.98
balf_cluster_gene_070809_1	545694.TREPR_1298	gnl|BL_ORD_ID|1541685 545694.TREPR_1298	186.037	7.81282e-54	30.49	Transcriptional regulator, GntR family	K
balf_cluster_gene_084430_1	435832.HMPREF0604_00684	gnl|BL_ORD_ID|8433685 435832.HMPREF0604_00684	780.015	0	99.01	permease	F
balf_cluster_gene_203472_1	1007104.SUS17_2779	gnl|BL_ORD_ID|1295232 1007104.SUS17_2779	352.443	1.9232e-113	50.78	cytochrome c biogenesis protein, transmembrane region	C:O
balf_cluster_gene_047296_1	661410.METDI0752	gnl|BL_ORD_ID|11634983 661410.METDI0752	548.125	0	83.74
balf_cluster_gene_138378_1	1028803.GG9_0486	gnl|BL_ORD_ID|6269221 1028803.GG9_0486	683.715	0	84.47	Protein of unknown function (DUF2827)	S
balf_cluster_gene_013717_1	905067.HMPREF9626_0047	gnl|BL_ORD_ID|14202730 905067.HMPREF9626_0047	766.148	0	97.86
balf_cluster_gene_071379_1	862512.HMPREF0277_0441	gnl|BL_ORD_ID|10366604 862512.HMPREF0277_0441	653.67	0	79.85
balf_cluster_gene_122291_1	866776.HMPREF9321_0185	gnl|BL_ORD_ID|1336274 866776.HMPREF9321_0185	676.011	0	91.14	Polysaccharide pyruvyl transferase	M
balf_cluster_gene_233028_1	553219.CAMSH0001_1375	gnl|BL_ORD_ID|7356582 553219.CAMSH0001_1375	712.22	0	96.35	heptosyltransferase	M
balf_cluster_gene_146659_1	552811.Dehly_1158	gnl|BL_ORD_ID|8929668 552811.Dehly_1158	526.939	0	62.88	conserved protein	S
balf_cluster_gene_118673_1	546273.VEIDISOL_01015	gnl|BL_ORD_ID|4288775 546273.VEIDISOL_01015	692.96	0	96.56	Fe-S assembly protein	O
balf_cluster_gene_198051_1	596329.HMPREF0631_1405	gnl|BL_ORD_ID|6463520 596329.HMPREF0631_1405	666.766	0	88.22	transposase	L
balf_cluster_gene_228852_1	536019.Mesop_0701	gnl|BL_ORD_ID|9619885 536019.Mesop_0701	556.599	0	65.8	UPF0261 protein	S
balf_cluster_gene_037416_1	279238.Saro_0050	gnl|BL_ORD_ID|3557830 279238.Saro_0050	496.508	4.32649e-175	70.54	ribonuclease BN	S
balf_cluster_gene_116928_1	553201.ROTMU0001_0483	gnl|BL_ORD_ID|9778763 553201.ROTMU0001_0483	729.939	0	97.55
balf_cluster_gene_024088_1	562973.HMPREF0059_01046	gnl|BL_ORD_ID|12553995 562973.HMPREF0059_01046	270.781	2.44975e-84	44.29
balf_cluster_gene_212095_1	879309.HMPREF9199_1270	gnl|BL_ORD_ID|1836200 879309.HMPREF9199_1270	694.501	0	99.42	Rod shape-determining protein, MreB	D
balf_cluster_gene_205379_1	288000.BBta_5149	gnl|BL_ORD_ID|9073801 288000.BBta_5149	738.028	0	88.58	acyl-CoA dehydrogenase	I
balf_cluster_gene_218042_1	402626.Rpic_1350	gnl|BL_ORD_ID|5588822 402626.Rpic_1350	735.332	0	86.9	Vwa containing coxe family protein	S
balf_cluster_gene_062965_1	997830.HMPREF1124_0778	gnl|BL_ORD_ID|4484224 997830.HMPREF1124_0778	719.924	0	96.44	Poorly processive error-prone DNA polymerase involved in untargeted mutagenesis. Copies undamaged DNA at stalled replication forks which arise in vivo from mismatched or misaligned primer ends. These misaligned primers can be extended by polIV. Exhibits no 3-5 exonuclease (proofreading) activity. May be involved in translesional synthesis in conjunction with the beta clamp from polIII (By similar…	L
balf_cluster_gene_158562_1	536019.Mesop_4718	gnl|BL_ORD_ID|9619328 536019.Mesop_4718	755.362	0	90.21	Threonine dehydratase	E
balf_cluster_gene_210980_1	378753.KRH_22020	gnl|BL_ORD_ID|2502021 378753.KRH_22020	718.383	0	90.62	glyoxalase bleomycin resistance protein dioxygenase	E
balf_cluster_gene_216623_1	662755.CRES_1785	gnl|BL_ORD_ID|4231060 662755.CRES_1785	561.607	0	73.87	Succinyl-CoA synthetase subunit beta	C
balf_cluster_gene_069117_1	627192.SLG_35840	gnl|BL_ORD_ID|323677 627192.SLG_35840	319.316	3.45564e-106	51.67	Alpha beta hydrolase	S
balf_cluster_gene_106564_1	760570.HMPREF0833_10754	gnl|BL_ORD_ID|13014932 760570.HMPREF0833_10754	692.96	0	98.29
balf_cluster_gene_095150_1	224911.bll0199	gnl|BL_ORD_ID|7496940 224911.bll0199	603.208	0	76.96	(ABC) transporter	E
balf_cluster_gene_028818_1	562971.HMPREF0005_05752	gnl|BL_ORD_ID|13839407 562971.HMPREF0005_05752	759.985	0	99.73
balf_cluster_gene_109127_1	596309.RHOER0001_0704	gnl|BL_ORD_ID|9822466 596309.RHOER0001_0704	671.003	0	99.14
balf_cluster_gene_133224_1	450851.PHZ_c2324	gnl|BL_ORD_ID|7726977 450851.PHZ_c2324	656.366	0	85.82	Cell Division Protein	D
balf_cluster_gene_128452_1	431947.PGN_0624	gnl|BL_ORD_ID|9395233 431947.PGN_0624	520.39	0	62.65	phospho-N-acetylmuramoyl-pentapeptide-transferase activity	M
balf_cluster_gene_115987_1	224911.blr0485	gnl|BL_ORD_ID|7503211 224911.blr0485	553.518	0	78.25	Major facilitator superfamily MFS_1	G
balf_cluster_gene_134031_1	706433.HMPREF9430_00111	gnl|BL_ORD_ID|2354533 706433.HMPREF9430_00111	716.072	0	99.43	Transcriptional regulator, gntR family	K
balf_cluster_gene_176230_1	553219.CAMSH0001_1068	gnl|BL_ORD_ID|7357667 553219.CAMSH0001_1068	709.138	0	97.43	Amp-dependent synthetase and ligase	I:Q
balf_cluster_gene_000185_1	680646.RMDY18_17590	gnl|BL_ORD_ID|6600333 680646.RMDY18_17590	523.857	0	62.94	Exchanges the guanine residue with 7-aminomethyl-7- deazaguanine in tRNAs with GU(N) anticodons (tRNA-Asp, -Asn, -His and -Tyr). After this exchange, a cyclopentendiol moiety is attached to the 7-aminomethyl group of 7-deazaguanine, resulting in the hypermodified nucleoside queuosine (Q) (7-(((4,5-cis- dihydroxy-2-cyclopenten-1-yl)amino)methyl)-7-deazaguanosine) (By similarity)	J
balf_cluster_gene_216910_1	445973.CLOBAR_01175	gnl|BL_ORD_ID|7425473 445973.CLOBAR_01175	560.451	0	67.38	Exchanges the guanine residue with 7-aminomethyl-7- deazaguanine in tRNAs with GU(N) anticodons (tRNA-Asp, -Asn, -His and -Tyr). After this exchange, a cyclopentendiol moiety is attached to the 7-aminomethyl group of 7-deazaguanine, resulting in the hypermodified nucleoside queuosine (Q) (7-(((4,5-cis- dihydroxy-2-cyclopenten-1-yl)amino)methyl)-7-deazaguanosine) (By similarity)	J
balf_cluster_gene_157012_1	224911.bll3075	gnl|BL_ORD_ID|7501924 224911.bll3075	431.409	3.55531e-150	67.9	Uncharacterized protein conserved in bacteria (DUF2336)	S
balf_cluster_gene_001349_1	575614.HMPREF0669_00784	gnl|BL_ORD_ID|6400427 575614.HMPREF0669_00784	655.981	0	97.24	Heavy metal efflux pump, CzcA	P
balf_cluster_gene_152110_1	765698.Mesci_0576	gnl|BL_ORD_ID|2845417 765698.Mesci_0576	484.182	4.00849e-171	73.83	(ABC) transporter	E
balf_cluster_gene_212965_1	562971.HMPREF0005_01160	gnl|BL_ORD_ID|13844968 562971.HMPREF0005_01160	759.214	0	99.74
balf_cluster_gene_227927_1	411465.PEPMIC_00242	gnl|BL_ORD_ID|3751930 411465.PEPMIC_00242	654.825	0	99.7	Membrane	S
balf_cluster_gene_148652_1	944560.HMPREF9058_0259	gnl|BL_ORD_ID|6432729 944560.HMPREF9058_0259	619.002	0	73.91	transport protein	P
balf_cluster_gene_058347_1	709797.CSIRO_2487	gnl|BL_ORD_ID|7185037 709797.CSIRO_2487	659.062	0	80.1	phosphonate metabolism protein PhnM	P
balf_cluster_gene_194580_1	1030843.PGTDC60_1617	gnl|BL_ORD_ID|14462471 1030843.PGTDC60_1617	614.379	0	75.93
balf_cluster_gene_078828_1	658086.HMPREF0994_02538	gnl|BL_ORD_ID|729813 658086.HMPREF0994_02538	231.491	1.6412e-69	32.73	Patatin-like phospholipase	S
balf_cluster_gene_205016_1	680646.RMDY18_17040	gnl|BL_ORD_ID|6599278 680646.RMDY18_17040	615.15	0	91.24	Methylamine utilisation protein MauE	S
balf_cluster_gene_096596_1	411466.ACTODO_00968	gnl|BL_ORD_ID|1771120 411466.ACTODO_00968	579.326	0	90.09	Inner membrane protein yedI	S
balf_cluster_gene_194555_1	562971.HMPREF0005_02581	gnl|BL_ORD_ID|13840527 562971.HMPREF0005_02581	660.603	0	99.7
balf_cluster_gene_090473_1	591023.AM202_0202	gnl|BL_ORD_ID|2163731 591023.AM202_0202	577.4	0	77.84	Fusaric acid resistance protein	S
balf_cluster_gene_136007_1	706433.HMPREF9430_01527	gnl|BL_ORD_ID|2354712 706433.HMPREF9430_01527	691.034	0	86.79	Modulates RecA activity (By similarity)	S
balf_cluster_gene_234236_1	224911.bll7193	gnl|BL_ORD_ID|7497310 224911.bll7193	720.309	0	90.5	Catalyzes the last two steps in the biosynthesis of 5- methylaminomethyl-2-thiouridine (mnm(5)s(2)U) at the wobble position (U34) in tRNA. Catalyzes the FAD-dependent demodification of cmnm(5)s(2)U34 to nm(5)s(2)U34, followed by the transfer of a methyl group from S-adenosyl-L-methionine to nm(5)s(2)U34, to form mnm(5)s(2)U34 (By similarity)	E
balf_cluster_gene_046539_1	754256.APP6_0028	gnl|BL_ORD_ID|14703548 754256.APP6_0028	229.95	3.43587e-70	43.66
balf_cluster_gene_092616_1	395963.Bind_2531	gnl|BL_ORD_ID|2246055 395963.Bind_2531	175.637	1.46715e-48	33.61	siderophore synthetase component-like protein	Q
balf_cluster_gene_052393_1	866778.HMPREF9684_1712	gnl|BL_ORD_ID|11624863 866778.HMPREF9684_1712	711.835	0	95.26
balf_cluster_gene_088173_1	246201.SM12261_1326	gnl|BL_ORD_ID|8584236 246201.SM12261_1326	764.607	0	98.4	Phosphotransfer between the C1 and C5 carbon atoms of pentose (By similarity)	G
balf_cluster_gene_108888_1	680646.RMDY18_11460	gnl|BL_ORD_ID|6599349 680646.RMDY18_11460	712.22	0	96.4
balf_cluster_gene_226726_1	269482.Bcep1808_2681	gnl|BL_ORD_ID|9588772 269482.Bcep1808_2681	444.891	9.73203e-147	52.28	integral membrane protein	S
balf_cluster_gene_121995_1	862965.PARA_17520	gnl|BL_ORD_ID|3063008 862965.PARA_17520	749.584	0	98.39	Periplasmic binding protein	P
balf_cluster_gene_128988_1	411466.ACTODO_01803	gnl|BL_ORD_ID|1772644 411466.ACTODO_01803	537.339	0	74.23
balf_cluster_gene_021700_1	997353.HMPREF9144_1649	gnl|BL_ORD_ID|8557204 997353.HMPREF9144_1649	735.717	0	98.9	Catalyzes the NAD(P)-dependent oxidation of 4- (phosphohydroxy)-L-threonine (HTP) into 2-amino-3-oxo-4- (phosphohydroxy)butyric acid which spontaneously decarboxylates to form 3-amino-2-oxopropyl phosphate (AHAP) (By similarity)	H
balf_cluster_gene_166704_1	414684.RC1_2772	gnl|BL_ORD_ID|6667942 414684.RC1_2772	498.819	4.13277e-174	64.06	Catalyzes the cleavage of L-kynurenine (L-Kyn) and L-3- hydroxykynurenine (L-3OHKyn) into anthranilic acid (AA) and 3- hydroxyanthranilic acid (3-OHAA), respectively (By similarity)	E
balf_cluster_gene_226158_1	680646.RMDY18_11730	gnl|BL_ORD_ID|6600738 680646.RMDY18_11730	682.559	0	98.83	Catalyzes the condensation reaction of fatty acid synthesis by the addition to an acyl acceptor of two carbons from malonyl-ACP. Catalyzes the first condensation reaction which initiates fatty acid synthesis and may therefore play a role in governing the total rate of fatty acid production. Possesses both acetoacetyl-ACP synthase and acetyl transacylase activities. Its substrate specificity deter…	I
balf_cluster_gene_061978_1	457394.BSFG_04382	gnl|BL_ORD_ID|13462810 457394.BSFG_04382	128.642	3.11009e-31	22.47
balf_cluster_gene_155051_1	525246.HMPREF0058_2148	gnl|BL_ORD_ID|9181603 525246.HMPREF0058_2148	464.151	1.17215e-158	62.17	cytidylyltransferase choline kinase	M
balf_cluster_gene_221592_1	888746.HMPREF9180_1175	gnl|BL_ORD_ID|3703018 888746.HMPREF9180_1175	644.81	0	94.96	(ABC) transporter	V
balf_cluster_gene_044609_1	706436.HMPREF9074_03417	gnl|BL_ORD_ID|4309918 706436.HMPREF9074_03417	657.522	0	99.38	DNA polymerase processivity factor activity	L
balf_cluster_gene_027594_1	1003200.AXXA_27520	gnl|BL_ORD_ID|3458488 1003200.AXXA_27520	642.114	0	98.15	extracellular solute-binding protein, family 1	P
balf_cluster_gene_114845_1	402881.Plav_2342	gnl|BL_ORD_ID|7363343 402881.Plav_2342	231.491	5.14221e-71	37.87	NA	S
balf_cluster_gene_107872_1	411466.ACTODO_01253	gnl|BL_ORD_ID|1771778 411466.ACTODO_01253	640.958	0	98.18	helicase	L
balf_cluster_gene_113741_1	525246.HMPREF0058_1534	gnl|BL_ORD_ID|9181736 525246.HMPREF0058_1534	459.144	3.15516e-154	67.37	hydrolase family 3	G
balf_cluster_gene_159939_1	562971.HMPREF0005_05134	gnl|BL_ORD_ID|13843141 562971.HMPREF0005_05134	807.364	0	99.76
balf_cluster_gene_198362_1	649742.HMPREF0970_01297	gnl|BL_ORD_ID|14221424 649742.HMPREF0970_01297	528.865	6.76425e-179	80.06
balf_cluster_gene_224299_1	997353.HMPREF9144_0677	gnl|BL_ORD_ID|8558212 997353.HMPREF9144_0677	771.155	0	99.47	transglycosylase	M
balf_cluster_gene_038776_1	680646.RMDY18_16090	gnl|BL_ORD_ID|6599952 680646.RMDY18_16090	708.753	0	98.58	phosphoribosylaminoimidazole carboxylase atpase subunit	F
balf_cluster_gene_111380_1	596309.RHOER0001_1820	gnl|BL_ORD_ID|9824364 596309.RHOER0001_1820	829.706	0	98.59
balf_cluster_gene_203838_1	288000.BBta_3466	gnl|BL_ORD_ID|9074321 288000.BBta_3466	676.781	0	91.18	extracellular solute-binding protein, family 7	Q
balf_cluster_gene_075469_1	441620.Mpop_2040	gnl|BL_ORD_ID|6962302 441620.Mpop_2040	691.034	0	99.15	Catalyzes the N-acylation of UDP-3-O-acylglucosamine using 3-hydroxyacyl-ACP as the acyl donor. Is involved in the biosynthesis of lipid A, a phosphorylated glycolipid that anchors the lipopolysaccharide to the outer membrane of the cell (By similarity)	M
balf_cluster_gene_227928_1	1045855.DSC_00150	gnl|BL_ORD_ID|3024207 1045855.DSC_00150	517.694	0	77.88	Transcriptional regulator	K
balf_cluster_gene_217991_1	553201.ROTMU0001_0937	gnl|BL_ORD_ID|9779195 553201.ROTMU0001_0937	626.706	0	88.01
balf_cluster_gene_170959_1	879309.HMPREF9199_0496	gnl|BL_ORD_ID|1836113 879309.HMPREF9199_0496	846.269	0	97.66	(ABC) transporter	V
balf_cluster_gene_031198_1	743718.Isova_1395	gnl|BL_ORD_ID|3260935 743718.Isova_1395	201.445	1.26255e-57	35.12	alpha beta hydrolase fold-3 domain protein	I
balf_cluster_gene_179830_1	266835.mlr6095	gnl|BL_ORD_ID|7528642 266835.mlr6095	519.235	0	59.62	methylaspartate ammonia-lyase	E
balf_cluster_gene_107641_1	709797.CSIRO_3255	gnl|BL_ORD_ID|7186083 709797.CSIRO_3255	560.836	0	69.92	Glycosyl transferase (Group 1	M
balf_cluster_gene_031940_1	479436.Vpar_0439	gnl|BL_ORD_ID|8743453 479436.Vpar_0439	795.423	0	98.51	malic enzyme	C
balf_cluster_gene_074769_1	596309.RHOER0001_0865	gnl|BL_ORD_ID|9822627 596309.RHOER0001_0865	706.057	0	98.58
balf_cluster_gene_183911_1	1046629.Ssal_01357	gnl|BL_ORD_ID|7163474 1046629.Ssal_01357	798.505	0	99.74	domain protein	S
balf_cluster_gene_185878_1	1007104.SUS17_3356	gnl|BL_ORD_ID|1295597 1007104.SUS17_3356	427.557	3.62264e-147	57.99	Domain of unknown function DUF20	S
balf_cluster_gene_185421_1	562971.HMPREF0005_02931	gnl|BL_ORD_ID|13844122 562971.HMPREF0005_02931	652.514	0	98.78
balf_cluster_gene_076693_1	234267.Acid_6072	gnl|BL_ORD_ID|8520848 234267.Acid_6072	303.138	5.36864e-101	47.53	short chain dehydrogenase	S
balf_cluster_gene_058500_1	553201.ROTMU0001_1289	gnl|BL_ORD_ID|9778547 553201.ROTMU0001_1289	640.958	0	95.35
balf_cluster_gene_163137_1	888052.HMPREF9006_1539	gnl|BL_ORD_ID|8698768 888052.HMPREF9006_1539	389.037	7.27405e-131	47.7	Major Facilitator Superfamily	G
balf_cluster_gene_035487_1	706433.HMPREF9430_00798	gnl|BL_ORD_ID|2354054 706433.HMPREF9430_00798	666.381	0	99.39	Part of the Sec protein translocase complex. Interacts with the SecYEG preprotein conducting channel. SecDF uses the proton motive force (PMF) to complete protein translocation after the ATP-dependent function of SecA (By similarity)	U
balf_cluster_gene_130614_1	487215.SPYALAB49_001189	gnl|BL_ORD_ID|13428930 487215.SPYALAB49_001189	163.31	4.01179e-43	29.35
balf_cluster_gene_037353_1	523794.Lebu_1961	gnl|BL_ORD_ID|977396 523794.Lebu_1961	781.556	0	94.83	Catalyzes the reversible conversion of 2- phosphoglycerate into phosphoenolpyruvate. It is essential for the degradation of carbohydrates via glycolysis (By similarity)	G
balf_cluster_gene_024194_1	450749.HMPREF0874_01132	gnl|BL_ORD_ID|12295415 450749.HMPREF0874_01132	762.681	0	98.47
balf_cluster_gene_104514_1	658664.HMPREF1004_02108	gnl|BL_ORD_ID|14816611 658664.HMPREF1004_02108	547.354	0	71.17
balf_cluster_gene_021963_1	517722.CJLT1_010100009666	gnl|BL_ORD_ID|8553149 517722.CJLT1_010100009666	512.686	0	69.06	dTDP-glucose 4-6-dehydratase	M
balf_cluster_gene_068433_1	1007104.SUS17_4024	gnl|BL_ORD_ID|1294153 1007104.SUS17_4024	740.725	0	84.93	DNA gyrase negatively supercoils closed circular double- stranded DNA in an ATP-dependent manner and also catalyzes the interconversion of other topological isomers of double-stranded DNA rings, including catenanes and knotted rings (By similarity)	L
balf_cluster_gene_012701_1	760570.HMPREF0833_10727	gnl|BL_ORD_ID|13014905 760570.HMPREF0833_10727	683.715	0	97.31
balf_cluster_gene_166059_1	913239.RAYM_04154	gnl|BL_ORD_ID|14669612 913239.RAYM_04154	578.941	0	78.2
balf_cluster_gene_127732_1	347253.SALIVA_1130	gnl|BL_ORD_ID|14145307 347253.SALIVA_1130	654.825	0	98.76
balf_cluster_gene_107646_1	1112204.GPOL_c03600	gnl|BL_ORD_ID|7260344 1112204.GPOL_c03600	83.9593	2.04499e-16	14.44
balf_cluster_gene_171293_1	479431.Namu_3975	gnl|BL_ORD_ID|1125733 479431.Namu_3975	374.015	2.13025e-127	59.94	Transcriptional regulator	K
balf_cluster_gene_144635_1	1048332.SALIVB_1242	gnl|BL_ORD_ID|11805285 1048332.SALIVB_1242	729.169	0	99.72
balf_cluster_gene_120762_1	441620.Mpop_1781	gnl|BL_ORD_ID|6960990 441620.Mpop_1781	610.912	0	97.21	ATP-grasp domain	S
balf_cluster_gene_013862_1	349106.PsycPRwf_1808	gnl|BL_ORD_ID|8809346 349106.PsycPRwf_1808	310.457	8.96014e-102	48.4	Zinc phosphodiesterase, which displays some tRNA 3'- processing endonuclease activity. Probably involved in tRNA maturation, by removing a 3'-trailer from precursor tRNA (By similarity)	S
balf_cluster_gene_216461_1	596315.HMPREF0634_0352	gnl|BL_ORD_ID|5779999 596315.HMPREF0634_0352	658.292	0	81.2	n-acetylmuramoyl-l-alanine amidase	M
balf_cluster_gene_152595_1	709797.CSIRO_3756	gnl|BL_ORD_ID|7184530 709797.CSIRO_3756	642.499	0	88.27	flagellar biosynthetic protein flhB	N
balf_cluster_gene_041714_1	866778.HMPREF9684_0856	gnl|BL_ORD_ID|11625409 866778.HMPREF9684_0856	386.341	2.90544e-119	64.79
balf_cluster_gene_161001_1	562971.HMPREF0005_04974	gnl|BL_ORD_ID|13843371 562971.HMPREF0005_04974	808.135	0	99.52
balf_cluster_gene_173586_1	411466.ACTODO_01380	gnl|BL_ORD_ID|1771765 411466.ACTODO_01380	824.313	0	98.34	Recombination factor protein RarA	L
balf_cluster_gene_124954_1	743721.Psesu_0288	gnl|BL_ORD_ID|611341 743721.Psesu_0288	593.193	0	84.18	Catalyzes the radical-mediated insertion of two sulfur atoms into the C-6 and C-8 positions of the octanoyl moiety bound to the lipoyl domains of lipoate-dependent enzymes, thereby converting the octanoylated domains into lipoylated derivatives (By similarity)	H
balf_cluster_gene_192433_1	234621.RER_33530	gnl|BL_ORD_ID|5196005 234621.RER_33530	755.362	0	99.19	The beta subunit is responsible for the synthesis of L- tryptophan from indole and L-serine (By similarity)	E
balf_cluster_gene_096505_1	114615.BRADO6588	gnl|BL_ORD_ID|5757182 114615.BRADO6588	604.749	0	90.46	Converts 1-hydroxy-2-methyl-2-(E)-butenyl 4-diphosphate into isopentenyl diphosphate (IPP) and dimethylallyl diphosphate (DMAPP) (By similarity)	I
balf_cluster_gene_125132_1	483216.BACEGG_01265	gnl|BL_ORD_ID|1496521 483216.BACEGG_01265	446.817	1.86705e-156	63.66	Abortive infection bacteriophage resistance protein	V
balf_cluster_gene_078612_1	680646.RMDY18_02100	gnl|BL_ORD_ID|6600687 680646.RMDY18_02100	696.427	0	99.72	membrane	S
balf_cluster_gene_158062_1	596315.HMPREF0634_0163	gnl|BL_ORD_ID|5780145 596315.HMPREF0634_0163	741.88	0	99.44	aminotransferase	E
balf_cluster_gene_141709_1	700598.Niako_0552	gnl|BL_ORD_ID|8359245 700598.Niako_0552	437.958	1.56654e-150	56.2	Molybdenum cofactor synthesis domain protein	H
balf_cluster_gene_105654_1	866778.HMPREF9684_1913	gnl|BL_ORD_ID|11626003 866778.HMPREF9684_1913	645.966	0	93.13
balf_cluster_gene_035888_1	553219.CAMSH0001_0480	gnl|BL_ORD_ID|7358620 553219.CAMSH0001_0480	663.685	0	91.86	PepSY-associated TM helix	S
balf_cluster_gene_195484_1	638301.HMPREF0444_1564	gnl|BL_ORD_ID|2635430 638301.HMPREF0444_1564	717.227	0	98.86	DNA gyrase negatively supercoils closed circular double- stranded DNA in an ATP-dependent manner and also catalyzes the interconversion of other topological isomers of double-stranded DNA rings, including catenanes and knotted rings (By similarity)	L
balf_cluster_gene_208767_1	1037409.BJ6T_83340	gnl|BL_ORD_ID|8423927 1037409.BJ6T_83340	615.92	0	88.63	Ompa motb domain protein	N
balf_cluster_gene_175523_1	553219.CAMSH0001_0098	gnl|BL_ORD_ID|7357517 553219.CAMSH0001_0098	687.182	0	99.15	permease protein	P
balf_cluster_gene_028040_1	428406.Rpic12D_1657	gnl|BL_ORD_ID|13821135 428406.Rpic12D_1657	742.651	0	98.37
balf_cluster_gene_118976_1	138119.DSY2801	gnl|BL_ORD_ID|2820030 138119.DSY2801	169.474	4.31164e-47	35.07	NA	S
balf_cluster_gene_159787_1	266265.Bxe_B1212	gnl|BL_ORD_ID|4967382 266265.Bxe_B1212	582.793	0	82.6	1-aminocyclopropane-1-carboxylate deaminase	E
balf_cluster_gene_175021_1	997353.HMPREF9144_0539	gnl|BL_ORD_ID|8556733 997353.HMPREF9144_0539	736.873	0	100	Phosphorylase is an important allosteric enzyme in carbohydrate metabolism. Enzymes from different sources differ in their regulatory mechanisms and in their natural substrates. However, all known phosphorylases share catalytic and structural properties (By similarity)	G
balf_cluster_gene_153738_1	287752.SI859A1_02764	gnl|BL_ORD_ID|1679948 287752.SI859A1_02764	575.859	0	75.75	Peptidase m42 family protein	E
balf_cluster_gene_178353_1	516950.SPCG_2205	gnl|BL_ORD_ID|13964607 516950.SPCG_2205	770.77	0	96.98
balf_cluster_gene_142027_1	866776.HMPREF9321_1438	gnl|BL_ORD_ID|1336014 866776.HMPREF9321_1438	445.662	6.5419e-149	65.25	domain protein	U:W
balf_cluster_gene_176927_1	879308.HMPREF9130_0623	gnl|BL_ORD_ID|2029051 879308.HMPREF9130_0623	275.018	4.09317e-88	41.47	NA	S
balf_cluster_gene_043823_1	596309.RHOER0001_2863	gnl|BL_ORD_ID|9821771 596309.RHOER0001_2863	784.637	0	97.73
balf_cluster_gene_137066_1	981368.XACM_2720	gnl|BL_ORD_ID|12865062 981368.XACM_2720	437.958	3.2345e-152	70.43
balf_cluster_gene_051615_1	242619.PG1724	gnl|BL_ORD_ID|1547268 242619.PG1724	572.007	0	79.82	Required for the formation of a threonylcarbamoyl group on adenosine at position 37 (t(6)A37) in tRNAs that read codons beginning with adenine (By similarity)	O
balf_cluster_gene_229786_1	450851.PHZ_c1606	gnl|BL_ORD_ID|7724813 450851.PHZ_c1606	257.684	1.0074e-80	49.16	rare lipoprotein A	M
balf_cluster_gene_031296_1	596322.STRSA0001_0011	gnl|BL_ORD_ID|13199512 596322.STRSA0001_0011	868.996	0	99.52
balf_cluster_gene_204920_1	525268.HMPREF0308_1415	gnl|BL_ORD_ID|9579735 525268.HMPREF0308_1415	420.624	9.62456e-146	65.85	mandelate racemase muconate lactonizing	M
balf_cluster_gene_197690_1	888833.HMPREF9421_0527	gnl|BL_ORD_ID|5955355 888833.HMPREF9421_0527	847.81	0	99.28	alpha-l-fucosidase	G
balf_cluster_gene_070517_1	702113.PP1Y_AT18026	gnl|BL_ORD_ID|4884794 702113.PP1Y_AT18026	403.29	1.30555e-138	62.1	protein-glutamate methylesterase activity	T
balf_cluster_gene_019621_1	547045.NEISICOT_00777	gnl|BL_ORD_ID|6157201 547045.NEISICOT_00777	778.089	0	98.69	Catalyzes the condensation of iminoaspartate with dihydroxyacetone phosphate to form quinolinate (By similarity)	H
balf_cluster_gene_014585_1	563045.CTS44_11636	gnl|BL_ORD_ID|12462799 563045.CTS44_11636	656.751	0	87.33
balf_cluster_gene_040454_1	888833.HMPREF9421_1441	gnl|BL_ORD_ID|5954459 888833.HMPREF9421_1441	719.153	0	99.15	Catalyzes the conversion of inosine 5'-phosphate (IMP) to xanthosine 5'-phosphate (XMP), the first committed and rate- limiting step in the de novo synthesis of guanine nucleotides, and therefore plays an important role in the regulation of cell growth (By similarity)	F
balf_cluster_gene_158778_1	596309.RHOER0001_2373	gnl|BL_ORD_ID|9821287 596309.RHOER0001_2373	637.876	0	99.4
balf_cluster_gene_094398_1	553201.ROTMU0001_1643	gnl|BL_ORD_ID|9779714 553201.ROTMU0001_1643	610.142	0	77.06
balf_cluster_gene_132313_1	888828.HMPREF9417_1192	gnl|BL_ORD_ID|10730460 888828.HMPREF9417_1192	646.736	0	98.18
balf_cluster_gene_014674_1	469585.HMPREF9007_00850	gnl|BL_ORD_ID|11349258 469585.HMPREF9007_00850	256.529	5.6162e-79	42.73
balf_cluster_gene_052201_1	428406.Rpic12D_3611	gnl|BL_ORD_ID|13823066 428406.Rpic12D_3611	548.895	0	79.59
balf_cluster_gene_006883_1	709797.CSIRO_2876	gnl|BL_ORD_ID|7186013 709797.CSIRO_2876	559.296	0	92.68	cysteine biosynthetic process from serine	E
balf_cluster_gene_188144_1	553217.ENHAE0001_2058	gnl|BL_ORD_ID|1304919 553217.ENHAE0001_2058	192.2	2.39183e-56	34.63	replication protein	L
balf_cluster_gene_091352_1	316057.RPD_2021	gnl|BL_ORD_ID|4406888 316057.RPD_2021	616.69	0	87.95	2-Nitropropane dioxygenase	S
balf_cluster_gene_133683_1	562983.HMPREF0433_00732	gnl|BL_ORD_ID|8446499 562983.HMPREF0433_00732	798.89	0	99.75	phosphoglycerate kinase	G
balf_cluster_gene_186717_1	441620.Mpop_0250	gnl|BL_ORD_ID|6959780 441620.Mpop_0250	683.715	0	97.43	4-amino-4-deoxy-alpha-L-arabinopyranosyl undecaprenyl phosphate biosynthetic process	G
balf_cluster_gene_006022_1	866778.HMPREF9684_0453	gnl|BL_ORD_ID|11625051 866778.HMPREF9684_0453	797.734	0	99.48
balf_cluster_gene_219112_1	411465.PEPMIC_01651	gnl|BL_ORD_ID|3751352 411465.PEPMIC_01651	818.15	0	98.31	ATP-dependent specificity component of the Clp protease. It directs the protease to specific substrates. Can perform chaperone functions in the absence of ClpP (By similarity)	O
balf_cluster_gene_015063_1	562971.HMPREF0005_05229	gnl|BL_ORD_ID|13842039 562971.HMPREF0005_05229	787.334	0	98.31
balf_cluster_gene_094762_1	983920.Y88_3684	gnl|BL_ORD_ID|21671 983920.Y88_3684	743.806	0	85.95	Catalyzes the condensation reaction of fatty acid synthesis by the addition to an acyl acceptor of two carbons from malonyl-ACP (By similarity)	I
balf_cluster_gene_186431_1	706433.HMPREF9430_01912	gnl|BL_ORD_ID|2353469 706433.HMPREF9430_01912	849.736	0	99.05	Cell wall formation. Adds enolpyruvyl to UDP-N- acetylglucosamine (By similarity)	M
balf_cluster_gene_157421_1	553201.ROTMU0001_0837	gnl|BL_ORD_ID|9779100 553201.ROTMU0001_0837	497.278	6.20001e-174	61.58
balf_cluster_gene_135008_1	402626.Rpic_0960	gnl|BL_ORD_ID|5588907 402626.Rpic_0960	808.135	0	95.2	lipoprotein releasing system transmembrane protein	M
balf_cluster_gene_076883_1	905067.HMPREF9626_1993	gnl|BL_ORD_ID|14202625 905067.HMPREF9626_1993	697.967	0	92.84
balf_cluster_gene_176617_1	596309.RHOER0001_1981	gnl|BL_ORD_ID|9824526 596309.RHOER0001_1981	703.745	0	98.31
balf_cluster_gene_007789_1	979556.MTES_3480	gnl|BL_ORD_ID|6346089 979556.MTES_3480	556.599	0	71.75	Exonuclease involved in the 3' processing of various precursor tRNAs. Initiates hydrolysis at the 3'-terminus of an RNA molecule and releases 5'-mononucleotides (By similarity)	J
balf_cluster_gene_079932_1	888052.HMPREF9006_0742	gnl|BL_ORD_ID|8699344 888052.HMPREF9006_0742	356.681	6.22291e-119	51.88	Exonuclease	L
balf_cluster_gene_155782_1	629266.PSYAC_11041	gnl|BL_ORD_ID|13970817 629266.PSYAC_11041	216.083	1.05084e-64	34.93
balf_cluster_gene_136286_1	1005703.HMPREF9949_0579	gnl|BL_ORD_ID|13643636 1005703.HMPREF9949_0579	710.679	0	99.43
balf_cluster_gene_118963_1	857572.E9Y_08966	gnl|BL_ORD_ID|12833840 857572.E9Y_08966	570.852	0	78.21
balf_cluster_gene_166491_1	449673.BACSTE_00087	gnl|BL_ORD_ID|7930646 449673.BACSTE_00087	312.768	6.57905e-102	40.47	DNA polymerase III subunit delta'	L
balf_cluster_gene_184814_1	360105.CCV52592_2033	gnl|BL_ORD_ID|2688496 360105.CCV52592_2033	412.149	1.613e-139	58.68	Dna recombination protein	S
balf_cluster_gene_031124_1	693982.Sinme_5469	gnl|BL_ORD_ID|11760164 693982.Sinme_5469	530.791	0	89.63
balf_cluster_gene_047890_1	262727.R2846_0350	gnl|BL_ORD_ID|14575886 262727.R2846_0350	778.089	0	89.95
balf_cluster_gene_011316_1	316056.RPC_2549	gnl|BL_ORD_ID|6034809 316056.RPC_2549	606.675	0	84.96	(ABC) transporter	E
balf_cluster_gene_212797_1	327275.SOHN41_03740	gnl|BL_ORD_ID|4975526 327275.SOHN41_03740	233.802	4.22933e-72	35.08	Aspartyl Asparaginyl beta-hydroxylase	S
balf_cluster_gene_014087_1	536019.Mesop_3543	gnl|BL_ORD_ID|9616605 536019.Mesop_3543	583.948	0	88.2	cell wall formation (By similarity)	M
balf_cluster_gene_076591_1	596309.RHOER0001_1444	gnl|BL_ORD_ID|9825442 596309.RHOER0001_1444	669.848	0	97.17
balf_cluster_gene_007514_1	553201.ROTMU0001_1389	gnl|BL_ORD_ID|9778645 553201.ROTMU0001_1389	661.759	0	97.02
balf_cluster_gene_062553_1	553219.CAMSH0001_0898	gnl|BL_ORD_ID|7357549 553219.CAMSH0001_0898	831.632	0	96.9	Monovalent cation H antiporter subunit D	C:P
balf_cluster_gene_141660_1	573065.Astex_2040	gnl|BL_ORD_ID|8090896 573065.Astex_2040	412.535	9.8208e-140	51.07	Phenylacetate-CoA ligase	Q
balf_cluster_gene_132314_1	889204.HMPREF9423_0844	gnl|BL_ORD_ID|11220091 889204.HMPREF9423_0844	858.21	0	98.6
balf_cluster_gene_052423_1	760570.HMPREF0833_10899	gnl|BL_ORD_ID|13015077 760570.HMPREF0833_10899	806.209	0	98.31
balf_cluster_gene_086407_1	546273.VEIDISOL_00621	gnl|BL_ORD_ID|4288588 546273.VEIDISOL_00621	688.723	0	99.7	Periplasmic binding protein	P
balf_cluster_gene_173339_1	888833.HMPREF9421_0822	gnl|BL_ORD_ID|5956206 888833.HMPREF9421_0822	771.155	0	96.13	amidohydrolase	E
balf_cluster_gene_058729_1	979556.MTES_3087	gnl|BL_ORD_ID|6344421 979556.MTES_3087	545.043	0	76.82	aminotransferase	E
balf_cluster_gene_112727_1	441620.Mpop_4900	gnl|BL_ORD_ID|6962095 441620.Mpop_4900	614.379	0	97.31	Binding-protein-dependent transport systems inner membrane component	P
balf_cluster_gene_027217_1	392499.Swit_0698	gnl|BL_ORD_ID|3862349 392499.Swit_0698	201.06	1.65733e-59	32.68	protein tyrosine serine phosphatase	T
balf_cluster_gene_192945_1	596320.NEIFL0001_1757	gnl|BL_ORD_ID|891236 596320.NEIFL0001_1757	553.132	0	93.51	Pilus assembly protein	N:U
balf_cluster_gene_227889_1	553201.ROTMU0001_0099	gnl|BL_ORD_ID|9779468 553201.ROTMU0001_0099	734.176	0	99.45
balf_cluster_gene_083443_1	888828.HMPREF9417_1149	gnl|BL_ORD_ID|10730417 888828.HMPREF9417_1149	678.707	0	99.41
balf_cluster_gene_023102_1	441620.Mpop_3550	gnl|BL_ORD_ID|6959436 441620.Mpop_3550	628.246	0	98.17	Mannose-1-phosphate guanylyltransferase Mannose-6-phosphate isomerase	G
balf_cluster_gene_020816_1	944560.HMPREF9058_0852	gnl|BL_ORD_ID|6433504 944560.HMPREF9058_0852	691.034	0	82.32	Catalyzes the formation of the alpha-1,6-glucosidic linkages in glycogen by scission of a 1,4-alpha-linked oligosaccharide from growing alpha-1,4-glucan chains and the subsequent attachment of the oligosaccharide to the alpha-1,6 position (By similarity)	G
balf_cluster_gene_114605_1	680646.RMDY18_14060	gnl|BL_ORD_ID|6600541 680646.RMDY18_14060	744.191	0	99.48	May be involved in recombinational repair of damaged DNA (By similarity)	L
balf_cluster_gene_165367_1	765698.Mesci_0045	gnl|BL_ORD_ID|2844984 765698.Mesci_0045	488.419	6.30748e-171	66.49	Efflux transporter rnd family, mfp subunit	M
balf_cluster_gene_117563_1	381666.H16_B1483	gnl|BL_ORD_ID|894495 381666.H16_B1483	650.588	0	84.69	Chromate	P
balf_cluster_gene_024674_1	435832.HMPREF0604_01960	gnl|BL_ORD_ID|8433280 435832.HMPREF0604_01960	658.677	0	96.35	deoxyribo-dipyrimidine photolyase	L
balf_cluster_gene_001275_1	546263.NEIELOOT_02087	gnl|BL_ORD_ID|5510928 546263.NEIELOOT_02087	660.218	0	94.71	periplasmic solute binding protein	P
balf_cluster_gene_071807_1	471854.Dfer_1089	gnl|BL_ORD_ID|709855 471854.Dfer_1089	460.685	2.8277e-159	59.35	Histidine kinase	T
balf_cluster_gene_034696_1	709797.CSIRO_1865	gnl|BL_ORD_ID|7183605 709797.CSIRO_1865	742.651	0	86.13	l-carnitine dehydratase bile acid-inducible protein F	C
balf_cluster_gene_059337_1	546263.NEIELOOT_02392	gnl|BL_ORD_ID|5509520 546263.NEIELOOT_02392	657.907	0	85.18	Transcriptional regulator	K
balf_cluster_gene_133039_1	203275.BFO_0149	gnl|BL_ORD_ID|9405992 203275.BFO_0149	516.538	4.93194e-176	62.63	ABC transporter (permease)	V
balf_cluster_gene_192271_1	649754.HMPREF0281_00245	gnl|BL_ORD_ID|3230422 649754.HMPREF0281_00245	583.178	0	88.62	Sigma factors are initiation factors that promote the attachment of RNA polymerase to specific initiation sites and are then released (By similarity)	K
balf_cluster_gene_008749_1	948561.SAO11_1944	gnl|BL_ORD_ID|14685328 948561.SAO11_1944	281.952	7.04415e-89	41.85
balf_cluster_gene_120813_1	634176.NT05HA_1774	gnl|BL_ORD_ID|8285651 634176.NT05HA_1774	737.258	0	97.8	histidinol-phosphatase activity	E
balf_cluster_gene_125252_1	114615.BRADO3967	gnl|BL_ORD_ID|5756053 114615.BRADO3967	140.198	5.71783e-34	24.41	Type I secretion membrane fusion protein (HlyD	U
balf_cluster_gene_119168_1	709797.CSIRO_0435	gnl|BL_ORD_ID|7184035 709797.CSIRO_0435	795.038	0	91.25	Phosphoribosylglycinamide synthetase	F
balf_cluster_gene_231537_1	478749.BRYFOR_08521	gnl|BL_ORD_ID|9254098 478749.BRYFOR_08521	141.354	6.06865e-35	33.44
balf_cluster_gene_047499_1	649742.HMPREF0970_00594	gnl|BL_ORD_ID|14221989 649742.HMPREF0970_00594	594.734	0	88.25
balf_cluster_gene_057457_1	649742.HMPREF0970_01930	gnl|BL_ORD_ID|14221139 649742.HMPREF0970_01930	815.068	0	91.55
balf_cluster_gene_135934_1	749219.MCR_1006	gnl|BL_ORD_ID|12939669 749219.MCR_1006	674.085	0	99.7
balf_cluster_gene_208222_1	546273.VEIDISOL_01311	gnl|BL_ORD_ID|4289533 546273.VEIDISOL_01311	717.998	0	98.89	Transcription elongation factor NusA	K
balf_cluster_gene_037637_1	502801.YPTS_1810	gnl|BL_ORD_ID|9985585 502801.YPTS_1810	306.99	1.6711e-100	41.78
balf_cluster_gene_088157_1	905067.HMPREF9626_0121	gnl|BL_ORD_ID|14202802 905067.HMPREF9626_0121	704.516	0	99.12
balf_cluster_gene_055014_1	596309.RHOER0001_4252	gnl|BL_ORD_ID|9825665 596309.RHOER0001_4252	765.763	0	99.2
balf_cluster_gene_215709_1	190650.CC_2672	gnl|BL_ORD_ID|5746641 190650.CC_2672	611.683	0	69.32	amidohydrolase	Q
balf_cluster_gene_028374_1	237727.NAP1_15473	gnl|BL_ORD_ID|7315164 237727.NAP1_15473	399.438	2.59448e-137	57.74	Arabinose 5-phosphate isomerase	M
balf_cluster_gene_086400_1	596322.STRSA0001_0679	gnl|BL_ORD_ID|13200867 596322.STRSA0001_0679	723.391	0	100
balf_cluster_gene_027152_1	864570.HMPREF9189_1847	gnl|BL_ORD_ID|7997270 864570.HMPREF9189_1847	641.728	0	94.53	Transcriptional regulator	K
balf_cluster_gene_085095_1	411486.CLOM621_05063	gnl|BL_ORD_ID|11128589 411486.CLOM621_05063	682.945	0	77.67
balf_cluster_gene_053781_1	317655.Sala_0131	gnl|BL_ORD_ID|257001 317655.Sala_0131	378.252	5.98201e-129	53.98	cytochrome C, class I	C
balf_cluster_gene_020454_1	596309.RHOER0001_5522	gnl|BL_ORD_ID|9820128 596309.RHOER0001_5522	645.966	0	98.17
balf_cluster_gene_137576_1	596309.RHOER0001_0669	gnl|BL_ORD_ID|9822431 596309.RHOER0001_0669	691.034	0	99.44
balf_cluster_gene_233926_1	288000.BBta_2214	gnl|BL_ORD_ID|9073437 288000.BBta_2214	562.762	0	75.61	Efflux transporter rnd family, mfp subunit	M
balf_cluster_gene_176437_1	411466.ACTODO_01414	gnl|BL_ORD_ID|1771733 411466.ACTODO_01414	715.687	0	99.71	glutamine synthetase	E
balf_cluster_gene_113430_1	665937.HMPREF1011_01047	gnl|BL_ORD_ID|13312784 665937.HMPREF1011_01047	586.645	0	72.43
balf_cluster_gene_004931_1	1045855.DSC_13390	gnl|BL_ORD_ID|3021448 1045855.DSC_13390	341.658	8.39041e-114	53.39	nhl repeat containing protein	S
balf_cluster_gene_117337_1	562973.HMPREF0059_02471	gnl|BL_ORD_ID|12553578 562973.HMPREF0059_02471	755.362	0	98.92
balf_cluster_gene_005223_1	321955.BlinB_010200008403	gnl|BL_ORD_ID|7269121 321955.BlinB_010200008403	194.126	1.21655e-56	37.96	permease protein	P
balf_cluster_gene_032042_1	401053.AciPR4_2793	gnl|BL_ORD_ID|9560975 401053.AciPR4_2793	276.944	1.3746e-89	47.98	Ornithine Cyclodeaminase	E
balf_cluster_gene_073328_1	862965.PARA_09210	gnl|BL_ORD_ID|3063260 862965.PARA_09210	215.698	9.8467e-64	29.36	dihydrolipoyl dehydrogenase	C
balf_cluster_gene_129448_1	224911.bll5746	gnl|BL_ORD_ID|7498439 224911.bll5746	655.596	0	82.25	RNA methyltransferase TrmH family, group 1	J
balf_cluster_gene_149948_1	562971.HMPREF0005_02268	gnl|BL_ORD_ID|13844348 562971.HMPREF0005_02268	718.768	0	98.92
balf_cluster_gene_179161_1	460265.Mnod_5441	gnl|BL_ORD_ID|8902811 460265.Mnod_5441	526.939	0	61.58	acyl-CoA dehydrogenase	I
balf_cluster_gene_067895_1	562973.HMPREF0059_02435	gnl|BL_ORD_ID|12553542 562973.HMPREF0059_02435	412.535	2.45863e-141	59.7
balf_cluster_gene_175904_1	441620.Mpop_3318	gnl|BL_ORD_ID|6962535 441620.Mpop_3318	536.184	0	73.94	Aldolase	E
balf_cluster_gene_149290_1	525260.HMPREF0276_2305	gnl|BL_ORD_ID|2134589 525260.HMPREF0276_2305	343.199	4.97612e-115	49.86	Hydrolase	G
balf_cluster_gene_145488_1	1007104.SUS17_2929	gnl|BL_ORD_ID|1294328 1007104.SUS17_2929	436.032	1.92176e-149	58.05	NA	S
balf_cluster_gene_216161_1	596309.RHOER0001_5165	gnl|BL_ORD_ID|9820385 596309.RHOER0001_5165	733.406	0	98.47
balf_cluster_gene_161621_1	546266.NEIMUCOT_06001	gnl|BL_ORD_ID|2485780 546266.NEIMUCOT_06001	599.356	0	88.99
balf_cluster_gene_133395_1	862965.PARA_18250	gnl|BL_ORD_ID|3063025 862965.PARA_18250	870.537	0	98.57	deaminase	F
balf_cluster_gene_012594_1	224911.bll0849	gnl|BL_ORD_ID|7502328 224911.bll0849	429.098	2.09722e-146	52.61	Serine protease	O
balf_cluster_gene_150620_1	546273.VEIDISOL_01967	gnl|BL_ORD_ID|4289022 546273.VEIDISOL_01967	766.918	0	97.47	Major Facilitator superfamily	G
balf_cluster_gene_018057_1	317655.Sala_2201	gnl|BL_ORD_ID|256950 317655.Sala_2201	360.918	1.06104e-119	50	Membrane	S
balf_cluster_gene_187544_1	1037409.BJ6T_42310	gnl|BL_ORD_ID|8424616 1037409.BJ6T_42310	612.453	0	79.44	Uncharacterized protein conserved in bacteria (DUF2336)	S
balf_cluster_gene_132817_1	546273.VEIDISOL_01398	gnl|BL_ORD_ID|4288650 546273.VEIDISOL_01398	747.658	0	96.77	Nad-dependent epimerase dehydratase	M
balf_cluster_gene_055236_1	857575.E9S_00625	gnl|BL_ORD_ID|13065620 857575.E9S_00625	672.929	0	80.1
balf_cluster_gene_122188_1	509190.Cseg_2427	gnl|BL_ORD_ID|8147938 509190.Cseg_2427	263.462	1.47338e-83	44.74	NA	S
balf_cluster_gene_185795_1	680646.RMDY18_18700	gnl|BL_ORD_ID|6600815 680646.RMDY18_18700	671.774	0	96.51	(ABC) transporter	P
balf_cluster_gene_211560_1	536019.Mesop_4938	gnl|BL_ORD_ID|9616204 536019.Mesop_4938	530.406	0	76.44	Enoyl-CoA hydratase	I
balf_cluster_gene_036567_1	398577.BamMC406_5694	gnl|BL_ORD_ID|11860487 398577.BamMC406_5694	529.635	0	70.14
balf_cluster_gene_186811_1	697281.Mahau_1701	gnl|BL_ORD_ID|7253519 697281.Mahau_1701	140.969	4.87233e-36	28.37	Membrane	S
balf_cluster_gene_024369_1	562973.HMPREF0059_01678	gnl|BL_ORD_ID|12554620 562973.HMPREF0059_01678	636.336	0	97.65
balf_cluster_gene_184299_1	680646.RMDY18_11600	gnl|BL_ORD_ID|6599382 680646.RMDY18_11600	716.072	0	99.46	Involved in targeting and insertion of nascent membrane proteins into the cytoplasmic membrane. Acts as a receptor for the complex formed by the signal recognition particle (SRP) and the ribosome-nascent chain (RNC)	U
balf_cluster_gene_007862_1	546273.VEIDISOL_00103	gnl|BL_ORD_ID|4288002 546273.VEIDISOL_00103	752.666	0	88.45
balf_cluster_gene_046054_1	638301.HMPREF0444_1864	gnl|BL_ORD_ID|2636224 638301.HMPREF0444_1864	454.521	4.49559e-159	66.97	NA	S
balf_cluster_gene_211497_1	546273.VEIDISOL_00022	gnl|BL_ORD_ID|4288428 546273.VEIDISOL_00022	724.546	0	97.21	aminotransferase	E
balf_cluster_gene_053179_1	411484.CLOSS21_01515	gnl|BL_ORD_ID|10025983 411484.CLOSS21_01515	278.87	4.85936e-87	46.73
balf_cluster_gene_080342_1	649742.HMPREF0970_01035	gnl|BL_ORD_ID|14221542 649742.HMPREF0970_01035	544.658	0	73.21
balf_cluster_gene_053641_1	649742.HMPREF0970_00365	gnl|BL_ORD_ID|14220716 649742.HMPREF0970_00365	599.356	0	95.43
balf_cluster_gene_085440_1	224911.bll0572	gnl|BL_ORD_ID|7500835 224911.bll0572	655.981	0	84.44	Dna topoisomerase	L
balf_cluster_gene_019540_1	411462.DORLON_01581	gnl|BL_ORD_ID|2696693 411462.DORLON_01581	103.605	2.3091e-22	20.43	NA	S
balf_cluster_gene_113606_1	562971.HMPREF0005_04816	gnl|BL_ORD_ID|13839545 562971.HMPREF0005_04816	738.413	0	99.72
balf_cluster_gene_206990_1	546266.NEIMUCOT_04276	gnl|BL_ORD_ID|2484328 546266.NEIMUCOT_04276	711.449	0	99.71	heptosyltransferase	M
balf_cluster_gene_127960_1	381666.H16_A0925	gnl|BL_ORD_ID|894247 381666.H16_A0925	573.548	0	76.2	aminopeptidase	E
balf_cluster_gene_029545_1	553201.ROTMU0001_0515	gnl|BL_ORD_ID|9778791 553201.ROTMU0001_0515	745.347	0	93.72
balf_cluster_gene_002186_1	536019.Mesop_3064	gnl|BL_ORD_ID|9614502 536019.Mesop_3064	531.561	0	84.16	Inner-membrane translocator	E
balf_cluster_gene_027913_1	596309.RHOER0001_6275	gnl|BL_ORD_ID|9820486 596309.RHOER0001_6275	748.814	0	100
balf_cluster_gene_186057_1	562971.HMPREF0005_03381	gnl|BL_ORD_ID|13840886 562971.HMPREF0005_03381	564.688	0	81.41
balf_cluster_gene_056281_1	351348.Maqu_0596	gnl|BL_ORD_ID|5126241 351348.Maqu_0596	109.383	1.64545e-24	25.97	Transcriptional regulator (AraC family)	K
balf_cluster_gene_052972_1	657315.ROI_04990	gnl|BL_ORD_ID|14689100 657315.ROI_04990	225.713	1.14668e-69	28.07
balf_cluster_gene_165976_1	879309.HMPREF9199_1030	gnl|BL_ORD_ID|1835357 879309.HMPREF9199_1030	652.514	0	89.55	ATP guanido phosphotransferase	E
balf_cluster_gene_146542_1	649743.HMPREF0972_00814	gnl|BL_ORD_ID|6173874 649743.HMPREF0972_00814	415.231	1.75233e-140	61.68	Carbohydrate kinase	G
balf_cluster_gene_219859_1	596309.RHOER0001_2732	gnl|BL_ORD_ID|9821640 596309.RHOER0001_2732	738.028	0	97.34
balf_cluster_gene_012804_1	596315.HMPREF0634_1420	gnl|BL_ORD_ID|5780056 596315.HMPREF0634_1420	763.066	0	100	(ABC) transporter	S
balf_cluster_gene_206148_1	314266.SKA58_01945	gnl|BL_ORD_ID|8818917 314266.SKA58_01945	724.546	0	89.18	acyl-CoA dehydrogenase	I
balf_cluster_gene_231908_1	441620.Mpop_5214	gnl|BL_ORD_ID|6960680 441620.Mpop_5214	760.37	0	96.62	Molybdenum cofactor synthesis domain protein	H
balf_cluster_gene_047388_1	562973.HMPREF0059_01166	gnl|BL_ORD_ID|12554115 562973.HMPREF0059_01166	330.487	3.54567e-108	50.83
balf_cluster_gene_010172_1	749219.MCR_1178	gnl|BL_ORD_ID|12939840 749219.MCR_1178	456.447	2.60116e-147	54.37
balf_cluster_gene_110880_1	666684.AfiDRAFT_2641	gnl|BL_ORD_ID|4800214 666684.AfiDRAFT_2641	364.77	3.63961e-124	56.84	(ABC) transporter	E
balf_cluster_gene_072413_1	545696.HOLDEFILI_02562	gnl|BL_ORD_ID|9509602 545696.HOLDEFILI_02562	498.049	1.05381e-173	69.88	glycine radical enzyme YjjI family	S
balf_cluster_gene_120346_1	562971.HMPREF0005_01198	gnl|BL_ORD_ID|13845006 562971.HMPREF0005_01198	809.29	0	99.75
balf_cluster_gene_008160_1	452662.SJA_C1-11750	gnl|BL_ORD_ID|6481416 452662.SJA_C1-11750	177.948	3.37875e-50	31.04	Histidine kinase	T
balf_cluster_gene_178715_1	702113.PP1Y_AT28066	gnl|BL_ORD_ID|4883042 702113.PP1Y_AT28066	578.556	0	72.99	DNA methylase n-4 n-6 domain protein	L
balf_cluster_gene_139265_1	608534.GCWU000341_00311	gnl|BL_ORD_ID|594964 608534.GCWU000341_00311	378.252	3.54878e-128	53.12	2-Nitropropane dioxygenase	S
balf_cluster_gene_182008_1	391587.KAOT1_13862	gnl|BL_ORD_ID|500421 391587.KAOT1_13862	501.901	4.0432e-178	69.14	Methyltransferase	S
balf_cluster_gene_122181_1	862965.PARA_10730	gnl|BL_ORD_ID|3063013 862965.PARA_10730	653.67	0	97.55	pseudouridine synthase activity	J
balf_cluster_gene_063941_1	688245.CtCNB1_0574	gnl|BL_ORD_ID|4595746 688245.CtCNB1_0574	575.474	0	74.45	Transcriptional regulator, gntR family	K
balf_cluster_gene_154000_1	272568.GDI_2893	gnl|BL_ORD_ID|7461007 272568.GDI_2893	689.108	0	86.68	Patatin group	S
balf_cluster_gene_177493_1	224911.bll7918	gnl|BL_ORD_ID|7500665 224911.bll7918	635.18	0	85.47	(ABC) transporter	E
balf_cluster_gene_232214_1	1007104.SUS17_2187	gnl|BL_ORD_ID|1297133 1007104.SUS17_2187	595.119	0	86.57	Fumarylacetoacetate hydrolase	Q
balf_cluster_gene_162967_1	709797.CSIRO_1152	gnl|BL_ORD_ID|7182815 709797.CSIRO_1152	574.704	0	84.13	pfkb domain protein	G
balf_cluster_gene_177612_1	709797.CSIRO_4027	gnl|BL_ORD_ID|7182837 709797.CSIRO_4027	616.305	0	93.01	extra-cytoplasmic solute receptor family protein	S
balf_cluster_gene_035535_1	930171.Asphe3_21530	gnl|BL_ORD_ID|638452 930171.Asphe3_21530	261.536	1.01878e-82	41.45	von willebrand factor, type	S
balf_cluster_gene_087603_1	546263.NEIELOOT_02233	gnl|BL_ORD_ID|5508844 546263.NEIELOOT_02233	642.114	0	97.84	Catalyzes the phosphorylation of pantothenate (Pan), the first step in CoA biosynthesis (By similarity)	K
balf_cluster_gene_196723_1	638301.HMPREF0444_0061	gnl|BL_ORD_ID|2636712 638301.HMPREF0444_0061	649.818	0	95	Required for the formation of a threonylcarbamoyl group on adenosine at position 37 (t(6)A37) in tRNAs that read codons beginning with adenine (By similarity)	O
balf_cluster_gene_167925_1	441620.Mpop_4808	gnl|BL_ORD_ID|6961590 441620.Mpop_4808	662.529	0	97.87	Polyphosphate kinase 2	S
balf_cluster_gene_057358_1	471853.Bcav_3563	gnl|BL_ORD_ID|9300429 471853.Bcav_3563	173.326	1.13881e-46	31.73	peptidase (S8 and S53, subtilisin, kexin, sedolisin	O
balf_cluster_gene_130816_1	857574.E9U_08803	gnl|BL_ORD_ID|12629793 857574.E9U_08803	783.097	0	99.49
balf_cluster_gene_122383_1	596320.NEIFL0001_0112	gnl|BL_ORD_ID|890619 596320.NEIFL0001_0112	716.842	0	96.65
balf_cluster_gene_079437_1	398577.BamMC406_5693	gnl|BL_ORD_ID|11860486 398577.BamMC406_5693	469.929	1.73605e-165	70.77
balf_cluster_gene_214757_1	749219.MCR_0892	gnl|BL_ORD_ID|12939555 749219.MCR_0892	697.967	0	100
balf_cluster_gene_199126_1	997353.HMPREF9144_0578	gnl|BL_ORD_ID|8558230 997353.HMPREF9144_0578	822.002	0	99
balf_cluster_gene_078440_1	596320.NEIFL0001_0641	gnl|BL_ORD_ID|890875 596320.NEIFL0001_0641	717.998	0	96.09	DNA ligase (NAD+) activity	L
balf_cluster_gene_097805_1	546268.NEISUBOT_05558	gnl|BL_ORD_ID|3026439 546268.NEISUBOT_05558	743.806	0	98.9	brancheD-chain amino acid aminotransferase	E
balf_cluster_gene_129015_1	526218.Sterm_2339	gnl|BL_ORD_ID|1257896 526218.Sterm_2339	567	0	65.59	metal cluster binding	E
balf_cluster_gene_078909_1	888833.HMPREF9421_0328	gnl|BL_ORD_ID|5955335 888833.HMPREF9421_0328	708.753	0	99.71	Dihydroxy-acid dehydratase	E
balf_cluster_gene_036215_1	453364.SP28804_1242	gnl|BL_ORD_ID|11242225 453364.SP28804_1242	757.673	0	94.63
balf_cluster_gene_001887_1	391735.Veis_4962	gnl|BL_ORD_ID|5293578 391735.Veis_4962	478.019	2.21562e-168	68.69	(ABC) transporter	E
balf_cluster_gene_064012_1	765698.Mesci_3685	gnl|BL_ORD_ID|2842258 765698.Mesci_3685	775.778	0	87.83	cyclopropane-fatty-acyl-phospholipid synthase	M
balf_cluster_gene_151904_1	706436.HMPREF9074_06233	gnl|BL_ORD_ID|4306096 706436.HMPREF9074_06233	758.829	0	99.46	Condensation of UDP-2,3-diacylglucosamine and 2,3- diacylglucosamine-1-phosphate to form lipid A disaccharide, a precursor of lipid A, a phosphorylated glycolipid that anchors the lipopolysaccharide to the outer membrane of the cell (By similarity)	M
balf_cluster_gene_089321_1	649761.HMPREF0973_01430	gnl|BL_ORD_ID|690820 649761.HMPREF0973_01430	728.783	0	99.72	3'-5' exoribonuclease that releases 5'-nucleoside monophosphates and is involved in maturation of structured RNAs (By similarity)	K
balf_cluster_gene_049608_1	596309.RHOER0001_5081	gnl|BL_ORD_ID|9823943 596309.RHOER0001_5081	786.178	0	99.22
balf_cluster_gene_012945_1	547043.BIFPSEUDO_03342	gnl|BL_ORD_ID|6310198 547043.BIFPSEUDO_03342	282.337	6.76499e-90	40.53	Catalyzes the conversion of dihydroorotate to orotate	F
balf_cluster_gene_015821_1	869214.NLY_38280	gnl|BL_ORD_ID|13570935 869214.NLY_38280	552.747	0	67.95
balf_cluster_gene_124071_1	706436.HMPREF9074_02170	gnl|BL_ORD_ID|4305258 706436.HMPREF9074_02170	648.277	0	98.77	Chromosome 14 open reading frame 101	S
balf_cluster_gene_140677_1	1037409.BJ6T_47950	gnl|BL_ORD_ID|8420426 1037409.BJ6T_47950	580.482	0	88.38	(ABC) transporter	E:P
balf_cluster_gene_003684_1	857574.E9U_05245	gnl|BL_ORD_ID|12628770 857574.E9U_05245	674.085	0	100
balf_cluster_gene_171095_1	887899.HMPREF0576_0292	gnl|BL_ORD_ID|10364292 887899.HMPREF0576_0292	337.806	1.77402e-111	46.95
balf_cluster_gene_052630_1	649743.HMPREF0972_00854	gnl|BL_ORD_ID|6174640 649743.HMPREF0972_00854	409.453	1.63278e-135	57.64	Ferrous iron transport protein b	P
balf_cluster_gene_161227_1	596309.RHOER0001_1651	gnl|BL_ORD_ID|9819738 596309.RHOER0001_1651	726.472	0	99.2
balf_cluster_gene_011820_1	224911.blr0314	gnl|BL_ORD_ID|7502679 224911.blr0314	672.159	0	88.1	Regulatory protein NosR	C:K
balf_cluster_gene_062414_1	596309.RHOER0001_3880	gnl|BL_ORD_ID|9823964 596309.RHOER0001_3880	834.713	0	98.58
balf_cluster_gene_181402_1	693982.Sinme_3906	gnl|BL_ORD_ID|11761331 693982.Sinme_3906	679.093	0	85.75
balf_cluster_gene_138684_1	546269.HMPREF0389_01189	gnl|BL_ORD_ID|2435644 546269.HMPREF0389_01189	613.609	0	96.01	Efflux transporter rnd family, mfp subunit	M
balf_cluster_gene_134156_1	862965.PARA_04840	gnl|BL_ORD_ID|3063275 862965.PARA_04840	656.366	0	97.52	Monooxygenase	C
balf_cluster_gene_063196_1	709797.CSIRO_0898	gnl|BL_ORD_ID|7183716 709797.CSIRO_0898	617.461	0	83.33	extracellular ligand-binding receptor	S
balf_cluster_gene_204383_1	317655.Sala_1662	gnl|BL_ORD_ID|256548 317655.Sala_1662	349.747	1.33135e-117	54.76	Transcriptional regulator	K
balf_cluster_gene_165675_1	627192.SLG_34390	gnl|BL_ORD_ID|322021 627192.SLG_34390	689.493	0	82.71	Acetylornithine aminotransferase	E
balf_cluster_gene_145854_1	1007104.SUS17_3539	gnl|BL_ORD_ID|1294991 1007104.SUS17_3539	253.447	1.69306e-79	44.63	Histidine kinase	T
balf_cluster_gene_036686_1	513049.AmaxDRAFT_1375	gnl|BL_ORD_ID|4557515 513049.AmaxDRAFT_1375	303.908	9.25738e-92	41.8	Histidine kinase	T
balf_cluster_gene_030821_1	224911.bll5103	gnl|BL_ORD_ID|7499325 224911.bll5103	520.39	0	67.55	Allows the formation of correctly charged Gln-tRNA(Gln) through the transamidation of misacylated Glu-tRNA(Gln) in organisms which lack glutaminyl-tRNA synthetase. The reaction takes place in the presence of glutamine and ATP through an activated gamma-phospho-Glu-tRNA(Gln) (By similarity)	J
balf_cluster_gene_029535_1	1114970.PSF113_3186	gnl|BL_ORD_ID|8008919 1114970.PSF113_3186	412.535	2.21425e-142	60.95	Aldo keto reductase	C
balf_cluster_gene_154100_1	1032480.MLP_26950	gnl|BL_ORD_ID|1010334 1032480.MLP_26950	634.024	0	77.8	saccharopine dehydrogenase	E
balf_cluster_gene_135254_1	888828.HMPREF9417_1342	gnl|BL_ORD_ID|10731537 888828.HMPREF9417_1342	702.205	0	99.15
balf_cluster_gene_020251_1	657317.ERE_26790	gnl|BL_ORD_ID|10550190 657317.ERE_26790	287.345	9.47843e-93	42.94
balf_cluster_gene_047303_1	543728.Vapar_2267	gnl|BL_ORD_ID|2397684 543728.Vapar_2267	317.005	1.75857e-103	46.68	Assembles around the rod to form the L-ring and probably protects the motor basal body from shearing forces during rotation (By similarity)	N
balf_cluster_gene_121319_1	314277.MED121_07100	gnl|BL_ORD_ID|1704844 314277.MED121_07100	361.303	3.49228e-121	48.22	D-Alanine-D-alanine ligase	S
balf_cluster_gene_217002_1	765698.Mesci_5157	gnl|BL_ORD_ID|2842427 765698.Mesci_5157	752.281	0	87.56	Sarcosine oxidase (Beta subunit)	E
balf_cluster_gene_105692_1	562971.HMPREF0005_02483	gnl|BL_ORD_ID|13840429 562971.HMPREF0005_02483	658.677	0	99.7
balf_cluster_gene_202694_1	473819.BIFDEN_00706	gnl|BL_ORD_ID|11193207 473819.BIFDEN_00706	581.252	0	68.35
balf_cluster_gene_037776_1	706433.HMPREF9430_00293	gnl|BL_ORD_ID|2354498 706433.HMPREF9430_00293	715.687	0	96.39	purine NTP-dependent helicase activity	L
balf_cluster_gene_153484_1	553174.HMPREF0659_A5313	gnl|BL_ORD_ID|9310219 553174.HMPREF0659_A5313	752.666	0	100	Catalyzes the GTP-dependent ribosomal translocation step during translation elongation. During this step, the ribosome changes from the pre-translocational (PRE) to the post- translocational (POST) state as the newly formed A-site-bound peptidyl-tRNA and P-site-bound deacylated tRNA move to the P and E sites, respectively. Catalyzes the coordinated movement of the two tRNA molecules, the mRNA and…	J
balf_cluster_gene_190199_1	1054460.SPPN_07050	gnl|BL_ORD_ID|7042873 1054460.SPPN_07050	697.582	0	98.83	Transfers and isomerizes the ribose moiety from AdoMet to the 7-aminomethyl group of 7-deazaguanine (preQ1-tRNA) to give epoxyqueuosine (oQ-tRNA) (By similarity)	J
balf_cluster_gene_136417_1	887325.HMPREF0381_2764	gnl|BL_ORD_ID|1957561 887325.HMPREF0381_2764	635.565	0	87.39	Anaerobic ribonucleoside-triphosphate reductase	F
balf_cluster_gene_128415_1	888052.HMPREF9006_0188	gnl|BL_ORD_ID|8699338 888052.HMPREF9006_0188	421.394	7.98365e-143	54.16	integral membrane protein	S
balf_cluster_gene_090658_1	509190.Cseg_3144	gnl|BL_ORD_ID|8147079 509190.Cseg_3144	463.381	2.12956e-161	65.9	GlcNAc 6-P deacetylase	G
balf_cluster_gene_226632_1	203275.BFO_0158	gnl|BL_ORD_ID|9405762 203275.BFO_0158	429.483	2.53007e-147	56.59	Outer membrane efflux protein	M
balf_cluster_gene_087721_1	391600.BBAL3_3046	gnl|BL_ORD_ID|6626297 391600.BBAL3_3046	738.028	0	90.05	Dehydrogenase	E
balf_cluster_gene_152707_1	680646.RMDY18_04380	gnl|BL_ORD_ID|6600038 680646.RMDY18_04380	723.391	0	98.61	Transcriptional regulator	K
balf_cluster_gene_227515_1	579137.Metvu_0997	gnl|BL_ORD_ID|1375295 579137.Metvu_0997	248.44	2.68438e-77	40.37	integral membrane protein	S
balf_cluster_gene_086683_1	63737.Npun_F6251	gnl|BL_ORD_ID|128083 63737.Npun_F6251	417.927	1.31443e-143	57.06	NADH flavin oxidoreductase, NADH oxidase	C
balf_cluster_gene_205552_1	553201.ROTMU0001_1476	gnl|BL_ORD_ID|9778724 553201.ROTMU0001_1476	764.607	0	95.43
balf_cluster_gene_219463_1	365659.smi_0593	gnl|BL_ORD_ID|4644391 365659.smi_0593	719.539	0	94.02	Catalyzes the interconversion of L-alanine and D- alanine. May also act on other amino acids (By similarity)	M
balf_cluster_gene_211846_1	441620.Mpop_3151	gnl|BL_ORD_ID|6960758 441620.Mpop_3151	588.956	0	95.12	Transfers the gamma-phosphate of ATP to the 4'-position of a tetraacyldisaccharide 1-phosphate intermediate (termed DS-1- P) to form tetraacyldisaccharide 1,4'-bis-phosphate (lipid IVA) (By similarity)	M
balf_cluster_gene_180572_1	709797.CSIRO_0596	gnl|BL_ORD_ID|7183700 709797.CSIRO_0596	502.286	1.2259e-177	93.55	permease protein	P
balf_cluster_gene_086361_1	1046629.Ssal_01311	gnl|BL_ORD_ID|7162126 1046629.Ssal_01311	796.964	0	97.86	NA	S
balf_cluster_gene_032791_1	765698.Mesci_1500	gnl|BL_ORD_ID|2841063 765698.Mesci_1500	533.487	0	67.09	Carboxypeptidase	M
balf_cluster_gene_152638_1	546263.NEIELOOT_01349	gnl|BL_ORD_ID|5510521 546263.NEIELOOT_01349	711.835	0	96.19	Involved in targeting and insertion of nascent membrane proteins into the cytoplasmic membrane. Acts as a receptor for the complex formed by the signal recognition particle (SRP) and the ribosome-nascent chain (RNC)	U
balf_cluster_gene_189699_1	411466.ACTODO_00256	gnl|BL_ORD_ID|1772031 411466.ACTODO_00256	548.895	0	87.54	permease protein	P
balf_cluster_gene_164740_1	888833.HMPREF9961_1333	gnl|BL_ORD_ID|5955188 888833.HMPREF9961_1333	817.765	0	96.81	Cleaves the N-terminal amino acid of tripeptides (By similarity)	E
balf_cluster_gene_161176_1	709797.CSIRO_2705	gnl|BL_ORD_ID|7184751 709797.CSIRO_2705	852.047	0	98.12	ATP-dependent specificity component of the Clp protease. It directs the protease to specific substrates. Can perform chaperone functions in the absence of ClpP (By similarity)	O
balf_cluster_gene_178132_1	553201.ROTMU0001_1305	gnl|BL_ORD_ID|9778563 553201.ROTMU0001_1305	662.914	0	90.36
balf_cluster_gene_156845_1	317655.Sala_0778	gnl|BL_ORD_ID|254663 317655.Sala_0778	439.499	2.82243e-153	67.7	Dehydrogenase	C
balf_cluster_gene_043214_1	575615.HMPREF0670_00209	gnl|BL_ORD_ID|217872 575615.HMPREF0670_00209	522.316	0	58.68	Glycosyl transferase (Group 1	M
balf_cluster_gene_049453_1	857572.E9Y_08541	gnl|BL_ORD_ID|12833757 857572.E9Y_08541	649.432	0	88.8
balf_cluster_gene_208419_1	760570.HMPREF0833_11979	gnl|BL_ORD_ID|13016157 760570.HMPREF0833_11979	816.994	0	98.99
balf_cluster_gene_039845_1	479436.Vpar_0996	gnl|BL_ORD_ID|8743861 479436.Vpar_0996	646.351	0	98.76	Allows the formation of correctly charged Asn-tRNA(Asn) or Gln-tRNA(Gln) through the transamidation of misacylated Asp- tRNA(Asn) or Glu-tRNA(Gln) in organisms which lack either or both of asparaginyl-tRNA or glutaminyl-tRNA synthetases. The reaction takes place in the presence of glutamine and ATP through an activated phospho-Asp-tRNA(Asn) or phospho-Glu-tRNA(Gln) (By similarity)	J
balf_cluster_gene_228602_1	706436.HMPREF9074_04548	gnl|BL_ORD_ID|4305899 706436.HMPREF9074_04548	790.415	0	99.22	surface antigen	S
balf_cluster_gene_221543_1	742820.HMPREF9459_00763	gnl|BL_ORD_ID|10904375 742820.HMPREF9459_00763	834.328	0	99.76
balf_cluster_gene_176857_1	546273.VEIDISOL_01428	gnl|BL_ORD_ID|4289825 546273.VEIDISOL_01428	662.914	0	96.4	NA	S
balf_cluster_gene_215100_1	553184.ATORI0001_1133	gnl|BL_ORD_ID|3357335 553184.ATORI0001_1133	581.637	0	79.76	activating enzyme	O
balf_cluster_gene_162026_1	469378.Ccur_05190	gnl|BL_ORD_ID|4652283 469378.Ccur_05190	246.514	6.30683e-75	36.86	NA	S
balf_cluster_gene_170325_1	706436.HMPREF9074_01210	gnl|BL_ORD_ID|4305380 706436.HMPREF9074_01210	785.023	0	97.94	NA	S
balf_cluster_gene_020680_1	765698.Mesci_0344	gnl|BL_ORD_ID|2840897 765698.Mesci_0344	651.744	0	88.38	extracellular solute-binding protein, family 7	Q
balf_cluster_gene_148940_1	411466.ACTODO_01247	gnl|BL_ORD_ID|1771638 411466.ACTODO_01247	580.867	0	88.2	dihydrolipoyl dehydrogenase	C
balf_cluster_gene_167685_1	1007104.SUS17_1169	gnl|BL_ORD_ID|1296944 1007104.SUS17_1169	344.739	1.35179e-115	55.86	mannose-1-phosphate guanylyltransferase activity	M
balf_cluster_gene_216524_1	521095.Apar_0043	gnl|BL_ORD_ID|5491032 521095.Apar_0043	617.846	0	91.87	inorganic phosphate transmembrane transporter activity	P
balf_cluster_gene_000018_1	1046629.Ssal_01748	gnl|BL_ORD_ID|7163094 1046629.Ssal_01748	718.383	0	98.35
balf_cluster_gene_182826_1	592031.GCWU000322_00989	gnl|BL_ORD_ID|4824829 592031.GCWU000322_00989	413.69	3.73218e-141	55.21	Essential cell division protein that forms a contractile ring structure (Z ring) at the future cell division site. The regulation of the ring assembly controls the timing and the location of cell division. One of the functions of the FtsZ ring is to recruit other cell division proteins to the septum to produce a new cell wall between the dividing cells. Binds GTP and shows GTPase activity (By sim…	D
balf_cluster_gene_234828_1	862512.HMPREF0277_1859	gnl|BL_ORD_ID|10365762 862512.HMPREF0277_1859	553.132	0	66.34
balf_cluster_gene_200579_1	709797.CSIRO_1033	gnl|BL_ORD_ID|7185175 709797.CSIRO_1033	789.26	0	93.58	rRNA (adenine-C2-)-methyltransferase activity	J
balf_cluster_gene_004264_1	888052.HMPREF9006_1040	gnl|BL_ORD_ID|8698581 888052.HMPREF9006_1040	93.2041	9.39686e-18	11.99
balf_cluster_gene_101665_1	546273.VEIDISOL_01892	gnl|BL_ORD_ID|4289583 546273.VEIDISOL_01892	751.125	0	98.96	permease	F
balf_cluster_gene_072455_1	743721.Psesu_1335	gnl|BL_ORD_ID|613155 743721.Psesu_1335	486.493	1.0626e-171	74.4	hydrolase family 3	G
balf_cluster_gene_046668_1	360104.CCC13826_1282	gnl|BL_ORD_ID|693789 360104.CCC13826_1282	642.884	0	95.96	succinate dehydrogenase	C
balf_cluster_gene_145005_1	553219.CAMSH0001_2123	gnl|BL_ORD_ID|7357738 553219.CAMSH0001_2123	638.262	0	97.27	integral membrane protein	S
balf_cluster_gene_223459_1	242619.PG1350	gnl|BL_ORD_ID|1547604 242619.PG1350	314.309	1.46506e-102	45.48	Transposase	L
balf_cluster_gene_191689_1	402626.Rpic_0790	gnl|BL_ORD_ID|5590655 402626.Rpic_0790	654.055	0	93.71	Part of the ABC transporter complex MetNIQ involved in methionine import. Responsible for energy coupling to the transport system (By similarity)	P
balf_cluster_gene_080841_1	279238.Saro_3096	gnl|BL_ORD_ID|3556161 279238.Saro_3096	658.677	0	82.12	nOP2 Sun	J
balf_cluster_gene_054326_1	365659.smi_0601	gnl|BL_ORD_ID|4644974 365659.smi_0601	605.905	0	85.15	sialidase	G
balf_cluster_gene_079616_1	562971.HMPREF0005_00192	gnl|BL_ORD_ID|13841447 562971.HMPREF0005_00192	656.366	0	99.69
balf_cluster_gene_014800_1	428406.Rpic12D_4336	gnl|BL_ORD_ID|13823774 428406.Rpic12D_4336	573.933	0	85.04
balf_cluster_gene_028428_1	562981.HMPREF0428_01163	gnl|BL_ORD_ID|932140 562981.HMPREF0428_01163	551.592	0	74.01
balf_cluster_gene_131954_1	887327.HMPREF0476_0906	gnl|BL_ORD_ID|7098072 887327.HMPREF0476_0906	181.03	1.98942e-48	38.44	Hemolysin-type calcium-binding	S
balf_cluster_gene_209325_1	469599.FSAG_01157	gnl|BL_ORD_ID|13992889 469599.FSAG_01157	757.673	0	99.18
balf_cluster_gene_130451_1	857576.E9Q_05978	gnl|BL_ORD_ID|11018607 857576.E9Q_05978	744.962	0	99.72
balf_cluster_gene_008988_1	365046.Rta_15860	gnl|BL_ORD_ID|7407957 365046.Rta_15860	364.385	6.4185e-123	51.55	extracellular solute-binding protein, family 1	P
balf_cluster_gene_109397_1	888828.HMPREF9417_0464	gnl|BL_ORD_ID|10732012 888828.HMPREF9417_0464	762.296	0	99.19
balf_cluster_gene_167765_1	392499.Swit_1006	gnl|BL_ORD_ID|3859301 392499.Swit_1006	634.024	0	82.65	acetyl-coa acetyltransferase	I
balf_cluster_gene_076623_1	1035189.HMPREF9954_2171	gnl|BL_ORD_ID|6270960 1035189.HMPREF9954_2171	679.863	0	99.11	Required for the formation of a threonylcarbamoyl group on adenosine at position 37 (t(6)A37) in tRNAs that read codons beginning with adenine (By similarity)	O
balf_cluster_gene_189220_1	706437.HMPREF0813_00804	gnl|BL_ORD_ID|4331066 706437.HMPREF0813_00804	702.59	0	99.71	Membrane	S
balf_cluster_gene_173531_1	979556.MTES_0548	gnl|BL_ORD_ID|6344072 979556.MTES_0548	90.8929	2.43408e-17	23.87	NA	S
balf_cluster_gene_085614_1	411466.ACTODO_01826	gnl|BL_ORD_ID|1772290 411466.ACTODO_01826	466.463	2.69573e-163	65.46
balf_cluster_gene_144658_1	562970.Btus_0869	gnl|BL_ORD_ID|7119844 562970.Btus_0869	297.36	5.6896e-96	38.94	glycosyl transferase group 1	M
balf_cluster_gene_233049_1	1007104.SUS17_2500	gnl|BL_ORD_ID|1297167 1007104.SUS17_2500	96.6709	1.73618e-19	28.72
balf_cluster_gene_045947_1	288000.BBta_2112	gnl|BL_ORD_ID|9071783 288000.BBta_2112	594.734	0	69.74	Monooxygenase	P
balf_cluster_gene_213405_1	391600.BBAL3_1648	gnl|BL_ORD_ID|6626388 391600.BBAL3_1648	621.313	0	76.2	NA	S
balf_cluster_gene_138012_1	743721.Psesu_0299	gnl|BL_ORD_ID|611149 743721.Psesu_0299	315.849	8.82821e-102	47.03	BNR repeat	S
balf_cluster_gene_008303_1	288000.BBta_6280	gnl|BL_ORD_ID|9074292 288000.BBta_6280	211.075	4.19689e-63	42.69	Transcriptional Regulator AraC Family	K
balf_cluster_gene_070023_1	596309.RHOER0001_2620	gnl|BL_ORD_ID|9821528 596309.RHOER0001_2620	737.643	0	92.98
balf_cluster_gene_105957_1	596309.RHOER0001_1254	gnl|BL_ORD_ID|9823142 596309.RHOER0001_1254	678.707	0	99.41
balf_cluster_gene_207736_1	435832.HMPREF0604_00113	gnl|BL_ORD_ID|8434205 435832.HMPREF0604_00113	709.138	0	96.07	NA	S
balf_cluster_gene_198048_1	981222.Cabther_A0187	gnl|BL_ORD_ID|4986194 981222.Cabther_A0187	176.022	7.6833e-49	31.02
balf_cluster_gene_220981_1	402626.Rpic_1773	gnl|BL_ORD_ID|5588521 402626.Rpic_1773	550.821	0	88.22	Cointegrate resolution protein T	S
balf_cluster_gene_218791_1	888056.HMPREF9062_1470	gnl|BL_ORD_ID|1728212 888056.HMPREF9062_1470	507.294	2.0109e-177	65.59	deoxyguanosinetriphosphate triphosphohydrolase-like protein	F
balf_cluster_gene_001711_1	866776.HMPREF9321_0321	gnl|BL_ORD_ID|1335198 866776.HMPREF9321_0321	823.543	0	97.35	succinyl-diaminopimelate desuccinylase activity	E
balf_cluster_gene_145951_1	360104.CCC13826_1858	gnl|BL_ORD_ID|694340 360104.CCC13826_1858	733.791	0	97.02	Adenine-specific	L
balf_cluster_gene_164702_1	596320.NEIFL0001_1462	gnl|BL_ORD_ID|891924 596320.NEIFL0001_1462	744.577	0	99.45	Prephenate dehydratase	E
balf_cluster_gene_176542_1	553206.CORTU0001_0899	gnl|BL_ORD_ID|12647924 553206.CORTU0001_0899	567	0	78.61
balf_cluster_gene_130294_1	252305.OB2597_19496	gnl|BL_ORD_ID|2565220 252305.OB2597_19496	298.13	1.12041e-95	39.3	l-carnitine dehydratase bile acid-inducible protein F	C
balf_cluster_gene_158828_1	553220.CAMGR0001_2228	gnl|BL_ORD_ID|4664414 553220.CAMGR0001_2228	616.69	0	95.99	reductase, NrfD	P
balf_cluster_gene_218404_1	866778.HMPREF9684_1582	gnl|BL_ORD_ID|11626053 866778.HMPREF9684_1582	823.543	0	96.65
balf_cluster_gene_163979_1	1003200.AXXA_27050	gnl|BL_ORD_ID|3457722 1003200.AXXA_27050	657.907	0	90.22	NA	S
balf_cluster_gene_114143_1	765698.Mesci_1023	gnl|BL_ORD_ID|2843092 765698.Mesci_1023	232.261	8.75571e-72	40	Transcriptional regulator (AraC family)	K
balf_cluster_gene_003456_1	224911.blr5449	gnl|BL_ORD_ID|7500021 224911.blr5449	674.855	0	82.74	succinyl-diaminopimelate desuccinylase activity	E
balf_cluster_gene_071413_1	649349.Lbys_2766	gnl|BL_ORD_ID|7978891 649349.Lbys_2766	340.502	1.53593e-114	52.32	Alpha beta hydrolase	S
balf_cluster_gene_135793_1	259536.Psyc_1057	gnl|BL_ORD_ID|7653873 259536.Psyc_1057	526.168	0	64.54	Acetylornithine aminotransferase	E
balf_cluster_gene_224480_1	675635.Psed_0002	gnl|BL_ORD_ID|9498720 675635.Psed_0002	560.836	0	83.57	DNA polymerase processivity factor activity	L
balf_cluster_gene_084554_1	237727.NAP1_06880	gnl|BL_ORD_ID|7317144 237727.NAP1_06880	483.026	1.12694e-168	62.43	rieske 2fe-2S domain-containing protein	P
balf_cluster_gene_224969_1	765698.Mesci_0394	gnl|BL_ORD_ID|2844061 765698.Mesci_0394	686.026	0	88.95	Part of the ABC transporter complex PotABCD involved in spermidine putrescine import. Responsible for energy coupling to the transport system (By similarity)	E
balf_cluster_gene_120541_1	862512.HMPREF0277_0368	gnl|BL_ORD_ID|10365297 862512.HMPREF0277_0368	679.093	0	97.01
balf_cluster_gene_220312_1	525373.HMPREF0766_13141	gnl|BL_ORD_ID|1528890 525373.HMPREF0766_13141	338.961	1.64586e-104	39.57	Helicase	L
balf_cluster_gene_124347_1	347253.SALIVA_1442	gnl|BL_ORD_ID|14145615 347253.SALIVA_1442	825.854	0	97.37
balf_cluster_gene_205145_1	411466.ACTODO_00901	gnl|BL_ORD_ID|1771464 411466.ACTODO_00901	474.937	2.65172e-166	72.4	pfkb domain protein	G
balf_cluster_gene_147555_1	888833.HMPREF9421_1101	gnl|BL_ORD_ID|5954291 888833.HMPREF9421_1101	836.639	0	97.42	The enzymes which catalyze the reversible phosphorolysis of pyrimidine nucleosides are involved in the degradation of these compounds and in their utilization as carbon and energy sources, or in the rescue of pyrimidine bases for nucleotide synthesis (By similarity)	F
balf_cluster_gene_179965_1	384676.PSEEN0410	gnl|BL_ORD_ID|9188180 384676.PSEEN0410	513.072	0	67.64	Catalytic subunit of the tRNA-splicing ligase complex that acts by directly joining spliced tRNA halves to mature-sized tRNAs by incorporating the precursor-derived splice junction phosphate into the mature tRNA as a canonical 3',5'- phosphodiester. May act as a RNA ligase with broad substrate specificity, and may function toward other RNAs (By similarity)	S
balf_cluster_gene_116628_1	598659.NAMH_1661	gnl|BL_ORD_ID|3161801 598659.NAMH_1661	219.55	1.67061e-65	32.45	heptosyltransferase	M
balf_cluster_gene_126348_1	391600.BBAL3_2560	gnl|BL_ORD_ID|6628885 391600.BBAL3_2560	523.857	2.62011e-172	65.22	cysteine desulfurase	E
balf_cluster_gene_174484_1	279238.Saro_1069	gnl|BL_ORD_ID|3556043 279238.Saro_1069	662.529	0	85.42	acetyl-coa acetyltransferase	I
balf_cluster_gene_224214_1	983920.Y88_1524	gnl|BL_ORD_ID|19373 983920.Y88_1524	478.404	1.0802e-159	61.34	Hopanoid biosynthesis associated RND transporter like protein HpnN	S
balf_cluster_gene_055176_1	596320.NEIFL0001_1416	gnl|BL_ORD_ID|891293 596320.NEIFL0001_1416	637.876	0	96.88	Catalyzes the ADP transfer to D-glycero-D-manno-heptose 1-phosphate, yielding ADP-D,D-heptose (By similarity)	M
balf_cluster_gene_155326_1	562983.HMPREF0433_01336	gnl|BL_ORD_ID|8445542 562983.HMPREF0433_01336	870.922	0	99.3	Catalyzes the attachment of serine to tRNA(Ser). Is also able to aminoacylate tRNA(Sec) with serine, to form the misacylated tRNA L-seryl-tRNA(Sec), which will be further converted into selenocysteinyl-tRNA(Sec) (By similarity)	J
balf_cluster_gene_207876_1	638301.HMPREF0444_0758	gnl|BL_ORD_ID|2635943 638301.HMPREF0444_0758	207.223	1.44384e-61	43.15
balf_cluster_gene_100448_1	224911.bll2462	gnl|BL_ORD_ID|7503592 224911.bll2462	534.643	0	85.2	Protein of unknown function (DUF1355)	S
balf_cluster_gene_017258_1	700598.Niako_7007	gnl|BL_ORD_ID|8361537 700598.Niako_7007	321.627	1.15174e-106	50	membrane	S
balf_cluster_gene_056050_1	316273.XCV1948	gnl|BL_ORD_ID|5992981 316273.XCV1948	361.688	2.56428e-119	57.76	Methyl-accepting chemotaxis	S
balf_cluster_gene_204359_1	546265.NEILACOT_03476	gnl|BL_ORD_ID|12134655 546265.NEILACOT_03476	708.753	0	95.03
balf_cluster_gene_222743_1	944560.HMPREF9058_0529	gnl|BL_ORD_ID|6432401 944560.HMPREF9058_0529	767.689	0	98.69	type iii restriction protein res subunit	L
balf_cluster_gene_166343_1	1045855.DSC_02690	gnl|BL_ORD_ID|3023613 1045855.DSC_02690	583.178	0	72.91	Type ii secretion system	U
balf_cluster_gene_054924_1	591167.Sfla_2774	gnl|BL_ORD_ID|2394394 591167.Sfla_2774	313.153	1.03475e-103	53.87	Specifically catalyzes the cleavage of the D-lactyl ether substituent of MurNAc 6-phosphate, producing GlcNAc 6- phosphate and D-lactate	S
balf_cluster_gene_144205_1	562981.HMPREF0428_00526	gnl|BL_ORD_ID|932675 562981.HMPREF0428_00526	768.459	0	96.29	Major Facilitator	G
balf_cluster_gene_234348_1	649742.HMPREF0970_01847	gnl|BL_ORD_ID|14220079 649742.HMPREF0970_01847	686.026	0	85.37
balf_cluster_gene_082867_1	450851.PHZ_c0852	gnl|BL_ORD_ID|7726084 450851.PHZ_c0852	350.903	6.83036e-117	52.76	Short-chain dehydrogenase reductase Sdr	S
balf_cluster_gene_223313_1	457394.BSFG_03036	gnl|BL_ORD_ID|13467020 457394.BSFG_03036	488.419	2.03261e-170	62.09
balf_cluster_gene_183483_1	355249.STTU_2436	gnl|BL_ORD_ID|13296918 355249.STTU_2436	145.206	8.26417e-38	22.71
balf_cluster_gene_036913_1	562971.HMPREF0005_02234	gnl|BL_ORD_ID|13844314 562971.HMPREF0005_02234	746.117	0	99.73
balf_cluster_gene_144473_1	1085623.GNIT_3430	gnl|BL_ORD_ID|4745039 1085623.GNIT_3430	487.649	1.63984e-171	65.41	l-carnitine dehydratase bile acid-inducible protein F	C
balf_cluster_gene_004210_1	266835.mll5519	gnl|BL_ORD_ID|7532374 266835.mll5519	464.537	2.69789e-162	67.61	Efflux transporter rnd family, mfp subunit	M
balf_cluster_gene_203389_1	1009464.HMPREF9231_0043	gnl|BL_ORD_ID|10882112 1009464.HMPREF9231_0043	119.783	7.61512e-28	20.74
balf_cluster_gene_135053_1	525262.HMPREF0297_0258	gnl|BL_ORD_ID|13131622 525262.HMPREF0297_0258	156.762	3.31647e-41	30.08
balf_cluster_gene_120192_1	596309.RHOER0001_1301	gnl|BL_ORD_ID|9823189 596309.RHOER0001_1301	647.121	0	99.39
balf_cluster_gene_121528_1	866778.HMPREF9684_0210	gnl|BL_ORD_ID|11625268 866778.HMPREF9684_0210	870.152	0	98.36
balf_cluster_gene_153650_1	696747.NIES39_J05090	gnl|BL_ORD_ID|5796203 696747.NIES39_J05090	174.481	9.7292e-46	30.28	repeat-containing protein	S
balf_cluster_gene_203109_1	114615.BRADO5558	gnl|BL_ORD_ID|5758462 114615.BRADO5558	447.973	3.19059e-155	58.98	Uncharacterized protein conserved in bacteria (DUF2336)	S
balf_cluster_gene_014682_1	562973.HMPREF0059_01710	gnl|BL_ORD_ID|12554652 562973.HMPREF0059_01710	826.239	0	98.32
balf_cluster_gene_074517_1	596309.RHOER0001_4263	gnl|BL_ORD_ID|9825675 596309.RHOER0001_4263	679.093	0	97.08
balf_cluster_gene_171347_1	706433.HMPREF9430_01970	gnl|BL_ORD_ID|2353191 706433.HMPREF9430_01970	635.565	0	92.9	NA	S
balf_cluster_gene_042654_1	431947.PGN_0099	gnl|BL_ORD_ID|9394422 431947.PGN_0099	338.961	2.145e-113	51.8	peptidase'	M
balf_cluster_gene_202595_1	234621.RER_46070	gnl|BL_ORD_ID|5197188 234621.RER_46070	660.603	0	99.39	Transcriptional regulator	K
balf_cluster_gene_066701_1	706433.HMPREF9430_01180	gnl|BL_ORD_ID|2354403 706433.HMPREF9430_01180	683.33	0	95.59	Nad-dependent epimerase dehydratase	S
balf_cluster_gene_158748_1	562971.HMPREF0005_03529	gnl|BL_ORD_ID|13840672 562971.HMPREF0005_03529	689.108	0	98.82
balf_cluster_gene_200087_1	469599.FSAG_00836	gnl|BL_ORD_ID|13993193 469599.FSAG_00836	677.167	0	97.67
balf_cluster_gene_071906_1	649742.HMPREF0970_02072	gnl|BL_ORD_ID|14219970 649742.HMPREF0970_02072	590.882	0	88.75
balf_cluster_gene_108348_1	749219.MCR_1561	gnl|BL_ORD_ID|12940216 749219.MCR_1561	670.233	0	99.7
balf_cluster_gene_195322_1	693982.Sinme_4733	gnl|BL_ORD_ID|11762122 693982.Sinme_4733	728.013	0	81
balf_cluster_gene_172132_1	888052.HMPREF9006_0762	gnl|BL_ORD_ID|8699034 888052.HMPREF9006_0762	522.702	0	76.74	stage II sporulation protein m	S
balf_cluster_gene_177959_1	908337.HMPREF9257_0897	gnl|BL_ORD_ID|4046735 908337.HMPREF9257_0897	678.322	0	81.91	F420-0:Gamma-glutamyl ligase	S
balf_cluster_gene_023312_1	267608.RSc0651	gnl|BL_ORD_ID|2083807 267608.RSc0651	429.869	1.44277e-149	63.8	Type ii secretion system	U
balf_cluster_gene_121173_1	913239.RAYM_02672	gnl|BL_ORD_ID|14669432 913239.RAYM_02672	575.474	0	78.24
balf_cluster_gene_000084_1	553219.CAMSH0001_1462	gnl|BL_ORD_ID|7357923 553219.CAMSH0001_1462	712.22	0	98.31	Associates with the EF-Tu.GDP complex and induces the exchange of GDP to GTP. It remains bound to the aminoacyl-tRNA.EF- Tu.GTP complex up to the GTP hydrolysis stage on the ribosome (By similarity)	J
balf_cluster_gene_173362_1	234621.RER_25530	gnl|BL_ORD_ID|5199604 234621.RER_25530	805.053	0	98.77	Membrane-associated zinc metalloprotease	M
balf_cluster_gene_198461_1	857572.E9Y_06374	gnl|BL_ORD_ID|12833451 857572.E9Y_06374	409.838	5.61824e-141	61.79
balf_cluster_gene_005571_1	709797.CSIRO_2233	gnl|BL_ORD_ID|7184810 709797.CSIRO_2233	650.203	0	92.51	Hydrolase	S
balf_cluster_gene_184506_1	1007104.SUS17_3708	gnl|BL_ORD_ID|1295868 1007104.SUS17_3708	427.943	7.74742e-147	71.06	Efflux transporter rnd family, mfp subunit	P
balf_cluster_gene_201719_1	875330.PsgRace4_27915	gnl|BL_ORD_ID|10772490 875330.PsgRace4_27915	177.563	2.2176e-51	30.56
balf_cluster_gene_132623_1	435832.HMPREF0604_01558	gnl|BL_ORD_ID|8432728 435832.HMPREF0604_01558	799.66	0	95.65	ABC transporter (permease)	V
balf_cluster_gene_059380_1	546273.VEIDISOL_00035	gnl|BL_ORD_ID|4288557 546273.VEIDISOL_00035	786.563	0	98.26	CBS Domain protein	P
balf_cluster_gene_003340_1	531844.FIC_02248	gnl|BL_ORD_ID|4797130 531844.FIC_02248	422.935	7.3276e-143	54.69	Surface antigen D15	M
balf_cluster_gene_112261_1	76869.PputGB1_4758	gnl|BL_ORD_ID|5177137 76869.PputGB1_4758	378.637	2.0234e-124	46.21
balf_cluster_gene_158019_1	658664.HMPREF1004_01447	gnl|BL_ORD_ID|14819513 658664.HMPREF1004_01447	612.068	0	95.43
balf_cluster_gene_007488_1	706436.HMPREF9074_03310	gnl|BL_ORD_ID|4310001 706436.HMPREF9074_03310	757.288	0	97.33	NA	S
balf_cluster_gene_124452_1	394503.Ccel_0074	gnl|BL_ORD_ID|2699096 394503.Ccel_0074	96.2857	3.14505e-20	26.14	Protein of unknown function (DUF2971)	S
balf_cluster_gene_011955_1	641149.HMPREF9016_01135	gnl|BL_ORD_ID|6001401 641149.HMPREF9016_01135	734.176	0	99.72	Peptide chain release factor 1 directs the termination of translation in response to the peptide chain termination codons UAG and UAA (By similarity)	J
balf_cluster_gene_043060_1	889206.HMPREF9425_1111	gnl|BL_ORD_ID|11505249 889206.HMPREF9425_1111	679.478	0	97.1
balf_cluster_gene_109620_1	1037409.BJ6T_39540	gnl|BL_ORD_ID|8425370 1037409.BJ6T_39540	613.994	0	93.64	(ABC) transporter	G
balf_cluster_gene_058799_1	562971.HMPREF0005_04223	gnl|BL_ORD_ID|13840089 562971.HMPREF0005_04223	795.038	0	99.74
balf_cluster_gene_014969_1	279238.Saro_0870	gnl|BL_ORD_ID|3555285 279238.Saro_0870	649.047	0	78.64	Beta-lactamase	V
balf_cluster_gene_139013_1	596320.NEIFL0001_0976	gnl|BL_ORD_ID|890544 596320.NEIFL0001_0976	708.368	0	93.6	low temperature requirement	S
balf_cluster_gene_234112_1	153948.NAL212_1922	gnl|BL_ORD_ID|6842763 153948.NAL212_1922	195.667	3.04333e-55	33.72	Phosphate-Selective Porin O and P	P
balf_cluster_gene_098297_1	224911.blr6225	gnl|BL_ORD_ID|7498560 224911.blr6225	589.341	0	82.34	Imidazole acetol-phosphate transaminase	E
balf_cluster_gene_008792_1	979556.MTES_0456	gnl|BL_ORD_ID|6346656 979556.MTES_0456	506.523	1.42553e-177	62.75	Histidine kinase	T
balf_cluster_gene_127705_1	765094.HMPREF9592_00488	gnl|BL_ORD_ID|14350312 765094.HMPREF9592_00488	884.789	0	100
balf_cluster_gene_008637_1	9606.ENSP00000456124	gnl|BL_ORD_ID|59663 9606.ENSP00000456124	718.383	0	99.73	Microtubule associated monoxygenase, calponin and LIM domain containing	Z
balf_cluster_gene_224853_1	862965.PARA_18030	gnl|BL_ORD_ID|3061878 862965.PARA_18030	698.738	0	93.37	drug resistance transporter, Bcr CflA	P
balf_cluster_gene_168860_1	634176.NT05HA_2158	gnl|BL_ORD_ID|8284835 634176.NT05HA_2158	672.159	0	94.93	ornithine carbamoyltransferase	E
balf_cluster_gene_111976_1	509190.Cseg_3870	gnl|BL_ORD_ID|8148886 509190.Cseg_3870	552.747	0	83.02	Sulfate ABC transporter periplasmic sulfate-binding protein	P
balf_cluster_gene_149438_1	866778.HMPREF9684_0733	gnl|BL_ORD_ID|11624797 866778.HMPREF9684_0733	868.996	0	99.06
balf_cluster_gene_062106_1	997353.HMPREF9144_0629	gnl|BL_ORD_ID|8556757 997353.HMPREF9144_0629	662.529	0	99.7	Associates with the EF-Tu.GDP complex and induces the exchange of GDP to GTP. It remains bound to the aminoacyl-tRNA.EF- Tu.GTP complex up to the GTP hydrolysis stage on the ribosome (By similarity)	J
balf_cluster_gene_206801_1	553219.CAMSH0001_0738	gnl|BL_ORD_ID|7356909 553219.CAMSH0001_0738	663.3	0	97.96	ABC transporter (permease)	V
balf_cluster_gene_155405_1	562971.HMPREF0005_00473	gnl|BL_ORD_ID|13841727 562971.HMPREF0005_00473	667.152	0	99.42
balf_cluster_gene_230505_1	279238.Saro_3061	gnl|BL_ORD_ID|3556856 279238.Saro_3061	629.402	0	89.28	aspartate transcarbamylase	F
balf_cluster_gene_142081_1	546268.NEISUBOT_04278	gnl|BL_ORD_ID|3026509 546268.NEISUBOT_04278	704.131	0	99.12	Catalyzes the attachment of proline to tRNA(Pro) in a two-step reaction proline is first activated by ATP to form Pro- AMP and then transferred to the acceptor end of tRNA(Pro). As ProRS can inadvertently accommodate and process non-cognate amino acids such as alanine and cysteine, to avoid such errors it has two additional distinct editing activities against alanine. One activity is designated a…	J
balf_cluster_gene_228304_1	450851.PHZ_c0379	gnl|BL_ORD_ID|7724758 450851.PHZ_c0379	570.466	0	76.12	succinyl-diaminopimelate desuccinylase activity	E
balf_cluster_gene_220873_1	771870.XP_003342641.1	gnl|BL_ORD_ID|2894028 771870.XP_003342641.1	144.05	2.0914e-37	12.73
balf_cluster_gene_129991_1	13616.ENSMODP00000038419	gnl|BL_ORD_ID|8712994 13616.ENSMODP00000038419	134.42	2.83794e-32	18.44	acid binding protein	I
balf_cluster_gene_167398_1	575612.HMPREF0660_00822	gnl|BL_ORD_ID|12438813 575612.HMPREF0660_00822	679.093	0	99.7
balf_cluster_gene_058557_1	709797.CSIRO_1366	gnl|BL_ORD_ID|7185263 709797.CSIRO_1366	591.652	0	78.67	NA	S
balf_cluster_gene_151843_1	395965.Msil_2702	gnl|BL_ORD_ID|283976 395965.Msil_2702	259.61	1.01158e-76	38.19	(ABC) transporter	V
balf_cluster_gene_011796_1	546268.NEISUBOT_04391	gnl|BL_ORD_ID|3026033 546268.NEISUBOT_04391	779.245	0	96.61	Trove domain	S
balf_cluster_gene_153936_1	979556.MTES_1148	gnl|BL_ORD_ID|6345073 979556.MTES_1148	230.335	2.17343e-70	42.37	Carboxypeptidase	M
balf_cluster_gene_205951_1	441620.Mpop_1906	gnl|BL_ORD_ID|6959586 441620.Mpop_1906	811.601	0	99.75	major facilitator Superfamily	G
balf_cluster_gene_073373_1	562971.HMPREF0005_03910	gnl|BL_ORD_ID|13843502 562971.HMPREF0005_03910	658.677	0	99.1
balf_cluster_gene_037185_1	360104.CCC13826_2196	gnl|BL_ORD_ID|694025 360104.CCC13826_2196	1157.13	0	95.87	Methyl-accepting chemotaxis	S
balf_cluster_gene_229449_1	562971.HMPREF0005_04827	gnl|BL_ORD_ID|13839556 562971.HMPREF0005_04827	815.839	0	99.25
balf_cluster_gene_227713_1	1035184.HMPREF1042_0458	gnl|BL_ORD_ID|6485187 1035184.HMPREF1042_0458	648.277	0	100	Polysaccharide biosynthesis protein	M
balf_cluster_gene_196582_1	391600.BBAL3_843	gnl|BL_ORD_ID|6627371 391600.BBAL3_843	494.197	8.66393e-173	85.19	Transporter	P
balf_cluster_gene_186315_1	452662.SJA_C2-02410	gnl|BL_ORD_ID|6482139 452662.SJA_C2-02410	503.442	2.52807e-177	65.76	oxidoreductase	S
balf_cluster_gene_009947_1	1037409.BJ6T_07930	gnl|BL_ORD_ID|8424234 1037409.BJ6T_07930	627.861	0	79.52	succinyl-diaminopimelate desuccinylase activity	E
balf_cluster_gene_110338_1	709797.CSIRO_1517	gnl|BL_ORD_ID|7183154 709797.CSIRO_1517	627.861	0	90.56	Sulfate ABC transporter periplasmic sulfate-binding protein	P
balf_cluster_gene_119118_1	596309.RHOER0001_0056	gnl|BL_ORD_ID|9819820 596309.RHOER0001_0056	691.034	0	99.7
balf_cluster_gene_061914_1	441620.Mpop_1632	gnl|BL_ORD_ID|6959615 441620.Mpop_1632	724.931	0	99.48	Catalyzes the oxidation of the C8 methyl side group on heme O porphyrin ring into a formyl group (By similarity)	O
balf_cluster_gene_213793_1	224911.bll6096	gnl|BL_ORD_ID|7498458 224911.bll6096	630.558	0	69.41	acyl-Coa dehydrogenase	I
balf_cluster_gene_227742_1	553175.POREN0001_1972	gnl|BL_ORD_ID|8274538 553175.POREN0001_1972	708.368	0	100	Endoribonuclease that initiates mRNA decay (By similarity)	S
balf_cluster_gene_230228_1	997353.HMPREF9144_1708	gnl|BL_ORD_ID|8558051 997353.HMPREF9144_1708	801.201	0	100	organic solvent tolerance protein	S
balf_cluster_gene_184636_1	546273.VEIDISOL_01261	gnl|BL_ORD_ID|4288416 546273.VEIDISOL_01261	831.247	0	96.88	hi0933 family	S
balf_cluster_gene_159660_1	536019.Mesop_5920	gnl|BL_ORD_ID|9616365 536019.Mesop_5920	602.438	0	86.23	succinylglutamate desuccinylase aspartoacylase	S
balf_cluster_gene_221955_1	796620.VIBC2010_17889	gnl|BL_ORD_ID|7938699 796620.VIBC2010_17889	131.724	3.38363e-32	20.74	NA	S
balf_cluster_gene_063225_1	888052.HMPREF9006_0130	gnl|BL_ORD_ID|8698311 888052.HMPREF9006_0130	269.626	2.70642e-80	48.04	DNA polymerase	L
balf_cluster_gene_024332_1	888828.HMPREF9417_1537	gnl|BL_ORD_ID|10731422 888828.HMPREF9417_1537	707.597	0	96.52
balf_cluster_gene_015680_1	596309.RHOER0001_3028	gnl|BL_ORD_ID|9821936 596309.RHOER0001_3028	816.609	0	97.81
balf_cluster_gene_114357_1	414684.RC1_2604	gnl|BL_ORD_ID|6665750 414684.RC1_2604	408.683	6.90632e-131	61.82	The heterodimer acts as both an ATP-dependent DNA helicase and an ATP-dependent, dual-direction single-stranded exonuclease. Recognizes the chi site generating a DNA molecule suitable for the initiation of homologous recombination. The AddA nuclease domain is required for chi fragment generation	L
balf_cluster_gene_038163_1	279238.Saro_0841	gnl|BL_ORD_ID|3557887 279238.Saro_0841	476.093	8.413e-168	76.62	magnesium and cobalt transport protein CorA	P
balf_cluster_gene_079749_1	553175.POREN0001_0191	gnl|BL_ORD_ID|8275603 553175.POREN0001_0191	743.036	0	92.14	repeat-containing protein	S
balf_cluster_gene_070239_1	469621.HMPREF0400_01293	gnl|BL_ORD_ID|10456307 469621.HMPREF0400_01293	779.63	0	98.45
balf_cluster_gene_227420_1	706433.HMPREF9430_00674	gnl|BL_ORD_ID|2354472 706433.HMPREF9430_00674	667.537	0	98.47	Glycosyl transferase, family 2	M
balf_cluster_gene_089671_1	521095.Apar_0007	gnl|BL_ORD_ID|5490869 521095.Apar_0007	711.449	0	92.43	DNA gyrase negatively supercoils closed circular double- stranded DNA in an ATP-dependent manner and also catalyzes the interconversion of other topological isomers of double-stranded DNA rings, including catenanes and knotted rings (By similarity)	L
balf_cluster_gene_056143_1	435832.HMPREF0604_01342	gnl|BL_ORD_ID|8433479 435832.HMPREF0604_01342	588.956	0	94.64	Membrane	S
balf_cluster_gene_077262_1	857575.E9S_04792	gnl|BL_ORD_ID|13066807 857575.E9S_04792	812.757	0	99.49
balf_cluster_gene_211571_1	452662.SJA_C1-05080	gnl|BL_ORD_ID|6484112 452662.SJA_C1-05080	674.085	0	99.69	Dehydrogenase	C
balf_cluster_gene_005822_1	700598.Niako_7065	gnl|BL_ORD_ID|8363955 700598.Niako_7065	594.734	0	86.02	NDH-1 shuttles electrons from NADH, via FMN and iron- sulfur (Fe-S) centers, to quinones in the respiratory chain. The immediate electron acceptor for the enzyme in this species is believed to be ubiquinone. Couples the redox reaction to proton translocation (for every two electrons transferred, four hydrogen ions are translocated across the cytoplasmic membrane), and thus conserves the redox ene…	C
balf_cluster_gene_073098_1	879309.HMPREF9199_1682	gnl|BL_ORD_ID|1836053 879309.HMPREF9199_1682	713.375	0	95.82	Dehydrogenase	C
balf_cluster_gene_017532_1	1030843.PGTDC60_2250	gnl|BL_ORD_ID|14463092 1030843.PGTDC60_2250	387.497	2.15277e-132	56.65
balf_cluster_gene_220844_1	596309.RHOER0001_2090	gnl|BL_ORD_ID|9824635 596309.RHOER0001_2090	712.605	0	99.43
balf_cluster_gene_059313_1	234621.RER_47620	gnl|BL_ORD_ID|5198384 234621.RER_47620	621.698	0	95.37	pseudouridine synthase activity	J
balf_cluster_gene_086623_1	706436.HMPREF9074_00338	gnl|BL_ORD_ID|4306572 706436.HMPREF9074_00338	638.262	0	96.88	prolyl-tRNA synthetase	S
balf_cluster_gene_151675_1	1030843.PGTDC60_1926	gnl|BL_ORD_ID|14462780 1030843.PGTDC60_1926	266.159	1.06384e-84	42.01
balf_cluster_gene_218658_1	979556.MTES_3355	gnl|BL_ORD_ID|6347041 979556.MTES_3355	603.979	0	78.11	An essential GTPase which binds GTP, GDP and possibly (p)ppGpp with moderate affinity, with high nucleotide exchange rates and a fairly low GTP hydrolysis rate (By similarity). It may play a role in control of the cell cycle, stress response, ribosome biogenesis and in those bacteria that undergo differentiation, in morphogenesis control	S
balf_cluster_gene_127935_1	546268.NEISUBOT_03441	gnl|BL_ORD_ID|3025284 546268.NEISUBOT_03441	748.043	0	98.66	Is required not only for elongation of protein synthesis but also for the initiation of all mRNA translation through initiator tRNA(fMet) aminoacylation (By similarity)	J
balf_cluster_gene_102521_1	411465.PEPMIC_00812	gnl|BL_ORD_ID|3752649 411465.PEPMIC_00812	804.283	0	99.24	The glycine cleavage system catalyzes the degradation of glycine. The P protein binds the alpha-amino group of glycine through its pyridoxal phosphate cofactor	E
balf_cluster_gene_197509_1	680646.RMDY18_07430	gnl|BL_ORD_ID|6600437 680646.RMDY18_07430	672.544	0	94.13
balf_cluster_gene_020679_1	411684.HPDFL43_08274	gnl|BL_ORD_ID|3536374 411684.HPDFL43_08274	385.956	2.73117e-132	59.44	alcohol dehydrogenase	C
balf_cluster_gene_074328_1	596309.RHOER0001_5114	gnl|BL_ORD_ID|9820333 596309.RHOER0001_5114	718.768	0	99.45
balf_cluster_gene_127190_1	658664.HMPREF1004_00716	gnl|BL_ORD_ID|14819830 658664.HMPREF1004_00716	552.362	0	86.39
balf_cluster_gene_147480_1	658664.HMPREF1004_02507	gnl|BL_ORD_ID|14816282 658664.HMPREF1004_02507	597.816	0	94.46
balf_cluster_gene_165202_1	866778.HMPREF9684_0109	gnl|BL_ORD_ID|11625602 866778.HMPREF9684_0109	841.262	0	98.54
balf_cluster_gene_066628_1	411466.ACTODO_01254	gnl|BL_ORD_ID|1771785 411466.ACTODO_01254	541.191	0	77.94	Dehydrogenase	E
balf_cluster_gene_228779_1	633149.Bresu_1695	gnl|BL_ORD_ID|7577589 633149.Bresu_1695	854.358	0	94.85	Isocitrate lyase	C
balf_cluster_gene_145886_1	469586.BSIG_03025	gnl|BL_ORD_ID|13882375 469586.BSIG_03025	218.009	1.81326e-61	35
balf_cluster_gene_126514_1	706433.HMPREF9430_01333	gnl|BL_ORD_ID|2353671 706433.HMPREF9430_01333	660.988	0	96.35	Catalyzes the conversion of inosine 5'-phosphate (IMP) to xanthosine 5'-phosphate (XMP), the first committed and rate- limiting step in the de novo synthesis of guanine nucleotides, and therefore plays an important role in the regulation of cell growth (By similarity)	F
balf_cluster_gene_024848_1	264730.PSPPH_1871	gnl|BL_ORD_ID|2467793 264730.PSPPH_1871	452.595	1.35514e-155	49.76	succinyl-diaminopimelate desuccinylase activity	E
balf_cluster_gene_016695_1	381754.PSPA7_0126	gnl|BL_ORD_ID|13528585 381754.PSPA7_0126	621.698	0	92.57
balf_cluster_gene_081812_1	1030843.PGTDC60_0803	gnl|BL_ORD_ID|14461672 1030843.PGTDC60_0803	394.43	2.94328e-133	58.04
balf_cluster_gene_175138_1	596320.NEIFL0001_2322	gnl|BL_ORD_ID|891707 596320.NEIFL0001_2322	672.544	0	99.7	glyceraldehyde3phosphate dehydrogenase	G
balf_cluster_gene_209031_1	350688.Clos_2430	gnl|BL_ORD_ID|6866550 350688.Clos_2430	230.72	4.33083e-71	38.62	permease protein	P
balf_cluster_gene_024059_1	1003200.AXXA_13354	gnl|BL_ORD_ID|3462353 1003200.AXXA_13354	618.231	0	97.51	Condenses 4-methyl-5-(beta-hydroxyethyl)thiazole monophosphate (THZ-P) and 2-methyl-4-amino-5-hydroxymethyl pyrimidine pyrophosphate (HMP-PP) to form thiamine monophosphate (TMP) (By similarity)	H
balf_cluster_gene_049326_1	641149.HMPREF9016_00960	gnl|BL_ORD_ID|6002439 641149.HMPREF9016_00960	773.852	0	98.15	Membrane	S
balf_cluster_gene_022303_1	471853.Bcav_2603	gnl|BL_ORD_ID|9299464 471853.Bcav_2603	236.498	9.8847e-71	31.75	transporter activity	G
balf_cluster_gene_036428_1	513049.AmaxDRAFT_1563	gnl|BL_ORD_ID|4559033 513049.AmaxDRAFT_1563	266.929	2.14109e-82	36.18	Filamentation induced by cAMP protein fic	S
balf_cluster_gene_015818_1	196164.HMPREF0290_0743	gnl|BL_ORD_ID|8643477 196164.HMPREF0290_0743	345.51	1.35326e-115	51.14	acyl-CoA dehydrogenase	I
balf_cluster_gene_160067_1	1030843.PGTDC60_2166	gnl|BL_ORD_ID|14463008 1030843.PGTDC60_2166	369.392	5.48996e-125	58.95
balf_cluster_gene_207139_1	523794.Lebu_0062	gnl|BL_ORD_ID|976829 523794.Lebu_0062	497.664	7.9728e-175	68.25	Ethanolamine utilization protein eutH	E
balf_cluster_gene_036535_1	765698.Mesci_2421	gnl|BL_ORD_ID|2841174 765698.Mesci_2421	493.426	8.89872e-175	79.94	transporter activity	P
balf_cluster_gene_159501_1	266835.mll3970	gnl|BL_ORD_ID|7533523 266835.mll3970	661.759	0	79.67	(ABC) transporter	E
balf_cluster_gene_084965_1	879309.HMPREF9199_1106	gnl|BL_ORD_ID|1836367 879309.HMPREF9199_1106	671.774	0	98.22	Transcriptional regulator	K
balf_cluster_gene_047580_1	596309.RHOER0001_0397	gnl|BL_ORD_ID|9825347 596309.RHOER0001_0397	820.846	0	99.5
balf_cluster_gene_207884_1	114615.BRADO7022	gnl|BL_ORD_ID|5754927 114615.BRADO7022	662.529	0	77.61	Glycosyl transferase (Group 1	M
balf_cluster_gene_168949_1	536019.Mesop_3935	gnl|BL_ORD_ID|9616496 536019.Mesop_3935	619.002	0	84.15	alcohol dehydrogenase	C
balf_cluster_gene_142976_1	441620.Mpop_1026	gnl|BL_ORD_ID|6961668 441620.Mpop_1026	666.381	0	99.69	thioredoxin reductase	O
balf_cluster_gene_225756_1	944565.HMPREF9127_0109	gnl|BL_ORD_ID|4105505 944565.HMPREF9127_0109	788.489	0	97.73	Dihydroorotase	F
balf_cluster_gene_165955_1	596309.RHOER0001_1488	gnl|BL_ORD_ID|9825485 596309.RHOER0001_1488	724.546	0	99.2
balf_cluster_gene_001318_1	888742.HMPREF9123_1532	gnl|BL_ORD_ID|2198371 888742.HMPREF9123_1532	511.531	0	76.38	DNA polymerase III subunit delta'	L
balf_cluster_gene_112213_1	161528.ED21_32089	gnl|BL_ORD_ID|8450047 161528.ED21_32089	416.387	3.18051e-143	57.98	acyl-CoA dehydrogenase	I
balf_cluster_gene_147640_1	553175.POREN0001_1940	gnl|BL_ORD_ID|8274099 553175.POREN0001_1940	675.241	0	93.7	peptidylprolyl cistrans isomerase	O
balf_cluster_gene_205295_1	596309.RHOER0001_6024	gnl|BL_ORD_ID|9820797 596309.RHOER0001_6024	636.336	0	96.13
balf_cluster_gene_102869_1	546273.VEIDISOL_00214	gnl|BL_ORD_ID|4287981 546273.VEIDISOL_00214	678.322	0	96.77	Replicative dna helicase	L
balf_cluster_gene_057611_1	596315.HMPREF0634_0782	gnl|BL_ORD_ID|5779723 596315.HMPREF0634_0782	704.901	0	98.86	threonine synthase	E
balf_cluster_gene_223971_1	866778.HMPREF9684_1967	gnl|BL_ORD_ID|11625765 866778.HMPREF9684_1967	776.163	0	89.78
balf_cluster_gene_003656_1	680646.RMDY18_11450	gnl|BL_ORD_ID|6599751 680646.RMDY18_11450	680.248	0	94.27	Periplasmic binding protein	P
balf_cluster_gene_169378_1	979556.MTES_2615	gnl|BL_ORD_ID|6345635 979556.MTES_2615	391.349	5.65615e-133	56.37	Part of the ABC transporter complex PotABCD involved in spermidine putrescine import. Responsible for energy coupling to the transport system (By similarity)	E
balf_cluster_gene_119378_1	888832.HMPREF9420_0686	gnl|BL_ORD_ID|2457720 888832.HMPREF9420_0686	844.343	0	99.26	alpha-l-fucosidase	G
balf_cluster_gene_190666_1	383407.Xoryp_010100019265	gnl|BL_ORD_ID|1318868 383407.Xoryp_010100019265	461.07	6.08989e-159	62.92	Histidine kinase	T
balf_cluster_gene_086013_1	700598.Niako_1085	gnl|BL_ORD_ID|8363612 700598.Niako_1085	353.599	1.26885e-116	44.01	Relaxase mobilization nuclease	S
balf_cluster_gene_152368_1	638301.HMPREF0444_1874	gnl|BL_ORD_ID|2636352 638301.HMPREF0444_1874	580.482	0	86.29	asparaginase	E
balf_cluster_gene_017564_1	1036743.F11_13510	gnl|BL_ORD_ID|12130288 1036743.F11_13510	244.202	1.55212e-75	36.27
balf_cluster_gene_156617_1	1003200.AXXA_20334	gnl|BL_ORD_ID|3460575 1003200.AXXA_20334	827.78	0	96.62	succinyl-diaminopimelate desuccinylase activity	E
balf_cluster_gene_177783_1	521095.Apar_1052	gnl|BL_ORD_ID|5490649 521095.Apar_1052	780.015	0	92.42	Dehydrogenase	C
balf_cluster_gene_141293_1	862908.BMS_2729	gnl|BL_ORD_ID|1502545 862908.BMS_2729	550.436	0	66.32	Metal Dependent Phosphohydrolase	S
balf_cluster_gene_127901_1	575615.HMPREF0670_02646	gnl|BL_ORD_ID|217945 575615.HMPREF0670_02646	452.21	2.60964e-150	54.91	receptor	P
balf_cluster_gene_219418_1	944565.HMPREF9127_0191	gnl|BL_ORD_ID|4106109 944565.HMPREF9127_0191	657.136	0	94.29	NADH flavin oxidoreductase, NADH oxidase	C
balf_cluster_gene_085232_1	633149.Bresu_2966	gnl|BL_ORD_ID|7576532 633149.Bresu_2966	591.652	0	86.52	The transhydrogenation between NADH and NADP is coupled to respiration and ATP hydrolysis and functions as a proton pump across the membrane (By similarity)	C
balf_cluster_gene_230207_1	585202.SMSK321_1429	gnl|BL_ORD_ID|2805477 585202.SMSK321_1429	820.076	0	95.86	Hydrolase	S
balf_cluster_gene_072717_1	562971.HMPREF0005_01987	gnl|BL_ORD_ID|13843950 562971.HMPREF0005_01987	757.288	0	99.48
balf_cluster_gene_195483_1	431947.PGN_0465	gnl|BL_ORD_ID|9395805 431947.PGN_0465	420.239	1.19649e-139	57.6	In eubacteria ppGpp (guanosine 3'-diphosphate 5-' diphosphate) is a mediator of the stringent response that coordinates a variety of cellular activities in response to changes in nutritional abundance (By similarity)	K:T
balf_cluster_gene_212124_1	279238.Saro_3032	gnl|BL_ORD_ID|3557622 279238.Saro_3032	287.73	5.39192e-95	42.99	NA	S
balf_cluster_gene_132427_1	469599.FSAG_00942	gnl|BL_ORD_ID|13992965 469599.FSAG_00942	700.664	0	100
balf_cluster_gene_126820_1	649742.HMPREF0970_01783	gnl|BL_ORD_ID|14220016 649742.HMPREF0970_01783	583.948	0	82.99
balf_cluster_gene_032339_1	649742.HMPREF0970_00141	gnl|BL_ORD_ID|14222047 649742.HMPREF0970_00141	669.463	0	89.15
balf_cluster_gene_120743_1	709797.CSIRO_3976	gnl|BL_ORD_ID|7183860 709797.CSIRO_3976	677.937	0	92.22	(ABC) transporter	G
balf_cluster_gene_222021_1	483217.BACDOR_01088	gnl|BL_ORD_ID|12073177 483217.BACDOR_01088	65.4698	8.6453e-09	9.39
balf_cluster_gene_000579_1	562983.HMPREF0433_00761	gnl|BL_ORD_ID|8445124 562983.HMPREF0433_00761	865.144	0	99.76	Histidyl-trna synthetase	J
balf_cluster_gene_230195_1	441620.Mpop_3543	gnl|BL_ORD_ID|6959794 441620.Mpop_3543	727.243	0	96.61	Glycosyl transferase (Group 1	M
balf_cluster_gene_200902_1	888833.HMPREF9961_0392	gnl|BL_ORD_ID|5952891 888833.HMPREF9961_0392	703.36	0	87.59	NA	S
balf_cluster_gene_131710_1	862965.PARA_17250	gnl|BL_ORD_ID|3063003 862965.PARA_17250	744.577	0	97.42	Involved in acetate metabolism (By similarity)	C
balf_cluster_gene_126572_1	709797.CSIRO_4071	gnl|BL_ORD_ID|7185602 709797.CSIRO_4071	674.085	0	91.94	Major Facilitator	G
balf_cluster_gene_060075_1	402626.Rpic_0841	gnl|BL_ORD_ID|5587836 402626.Rpic_0841	678.322	0	88.16	Efflux transporter rnd family, mfp subunit	V
balf_cluster_gene_042216_1	279238.Saro_2515	gnl|BL_ORD_ID|3557877 279238.Saro_2515	486.108	1.35568e-168	60.19	amidohydrolase	Q
balf_cluster_gene_104858_1	879309.HMPREF9199_0844	gnl|BL_ORD_ID|1836602 879309.HMPREF9199_0844	725.702	0	99.14	rRNA (adenine-C2-)-methyltransferase activity	J
balf_cluster_gene_168528_1	680646.RMDY18_12170	gnl|BL_ORD_ID|6599945 680646.RMDY18_12170	763.451	0	93.07	40-residue yvtn family beta-propeller repeat protein	S
balf_cluster_gene_034643_1	1003200.AXXA_07320	gnl|BL_ORD_ID|3461718 1003200.AXXA_07320	783.482	0	98.74	l-carnitine dehydratase bile acid-inducible protein F	C
balf_cluster_gene_071526_1	553201.ROTMU0001_0883	gnl|BL_ORD_ID|9779144 553201.ROTMU0001_0883	842.417	0	99.52
balf_cluster_gene_128879_1	888052.HMPREF9006_0830	gnl|BL_ORD_ID|8698360 888052.HMPREF9006_0830	567.385	0	86.07	Cytosine-specific methyltransferase	L
balf_cluster_gene_184842_1	441620.Mpop_2372	gnl|BL_ORD_ID|6960775 441620.Mpop_2372	862.833	0	99.76	ATP-dependent specificity component of the Clp protease. It directs the protease to specific substrates. Can perform chaperone functions in the absence of ClpP (By similarity)	O
balf_cluster_gene_090530_1	546263.NEIELOOT_01586	gnl|BL_ORD_ID|5509089 546263.NEIELOOT_01586	734.176	0	98.62	3-dehydroquinate synthase	E
balf_cluster_gene_184000_1	411466.ACTODO_00276	gnl|BL_ORD_ID|1772344 411466.ACTODO_00276	707.983	0	96	Catalyzes the conversion of inosine 5'-phosphate (IMP) to xanthosine 5'-phosphate (XMP), the first committed and rate- limiting step in the de novo synthesis of guanine nucleotides, and therefore plays an important role in the regulation of cell growth (By similarity)	F
balf_cluster_gene_012439_1	1037409.BJ6T_02090	gnl|BL_ORD_ID|8423886 1037409.BJ6T_02090	511.916	1.699e-180	80.76	(ABC) transporter	E
balf_cluster_gene_134220_1	546273.VEIDISOL_00216	gnl|BL_ORD_ID|4287979 546273.VEIDISOL_00216	688.337	0	98.81	Poorly processive error-prone DNA polymerase involved in untargeted mutagenesis. Copies undamaged DNA at stalled replication forks which arise in vivo from mismatched or misaligned primer ends. These misaligned primers can be extended by polIV. Exhibits no 3-5 exonuclease (proofreading) activity. May be involved in translesional synthesis in conjunction with the beta clamp from polIII (By similar…	L
balf_cluster_gene_131453_1	649742.HMPREF0970_00760	gnl|BL_ORD_ID|14221759 649742.HMPREF0970_00760	624.394	0	93.82
balf_cluster_gene_233132_1	702113.PP1Y_AT22415	gnl|BL_ORD_ID|4883766 702113.PP1Y_AT22415	352.829	2.96469e-117	52.73	NA	S
balf_cluster_gene_192452_1	700598.Niako_4264	gnl|BL_ORD_ID|8363167 700598.Niako_4264	353.214	4.49515e-112	56.66	tonB-dependent Receptor	S
balf_cluster_gene_057586_1	1042878.CNE_2c01910	gnl|BL_ORD_ID|10630345 1042878.CNE_2c01910	374.785	6.66222e-128	56.21
balf_cluster_gene_041921_1	546273.VEIDISOL_00686	gnl|BL_ORD_ID|4289740 546273.VEIDISOL_00686	669.848	0	99.69	Catalyzes, together with MoaC, the conversion of 5'-GTP to cyclic pyranopterin monophosphate (cPMP or molybdopterin precursor Z) (By similarity)	H
balf_cluster_gene_118104_1	562971.HMPREF0005_02095	gnl|BL_ORD_ID|13844058 562971.HMPREF0005_02095	693.73	0	90.93
balf_cluster_gene_204947_1	546264.NEIFLAOT_00722	gnl|BL_ORD_ID|4568744 546264.NEIFLAOT_00722	769.229	0	97.62	serine threonine protein phosphatase	S
balf_cluster_gene_051630_1	546266.NEIMUCOT_05075	gnl|BL_ORD_ID|2483963 546266.NEIMUCOT_05075	822.772	0	98.53	Catalyzes two activities which are involved in the cyclic version of arginine biosynthesis the synthesis of N- acetylglutamate from glutamate and acetyl-CoA as the acetyl donor, and of ornithine by transacetylation between N(2)-acetylornithine and glutamate (By similarity)	E
balf_cluster_gene_038650_1	638301.HMPREF0444_0521	gnl|BL_ORD_ID|2636503 638301.HMPREF0444_0521	785.023	0	89	Catalyzes the formation of the alpha-1,6-glucosidic linkages in glycogen by scission of a 1,4-alpha-linked oligosaccharide from growing alpha-1,4-glucan chains and the subsequent attachment of the oligosaccharide to the alpha-1,6 position (By similarity)	G
balf_cluster_gene_065119_1	452662.SJA_C1-17240	gnl|BL_ORD_ID|6484622 452662.SJA_C1-17240	688.337	0	76.63	saccharopine dehydrogenase	E
balf_cluster_gene_164932_1	311403.Arad_0701	gnl|BL_ORD_ID|8121157 311403.Arad_0701	334.339	8.37135e-112	48.34	Platelet-activating factor acetylhydrolase plasma intracellular isoform II	S
balf_cluster_gene_100991_1	391600.BBAL3_2188	gnl|BL_ORD_ID|6627025 391600.BBAL3_2188	505.368	2.97372e-179	75.76	type ii secretion system	U
balf_cluster_gene_079345_1	317655.Sala_1642	gnl|BL_ORD_ID|254436 317655.Sala_1642	682.174	0	80.66	Vwa containing coxe family protein	S
balf_cluster_gene_030062_1	862965.PARA_08150	gnl|BL_ORD_ID|3061991 862965.PARA_08150	679.863	0	99.4	(ABC) transporter	E
balf_cluster_gene_096171_1	411465.PEPMIC_01228	gnl|BL_ORD_ID|3752074 411465.PEPMIC_01228	729.939	0	99.73	exodeoxyribonuclease v alpha	L
balf_cluster_gene_104271_1	1037409.BJ6T_38610	gnl|BL_ORD_ID|8418624 1037409.BJ6T_38610	338.191	4.27102e-110	60.62	Flagellin	S
balf_cluster_gene_212933_1	868597.BurJV3_3915	gnl|BL_ORD_ID|14796553 868597.BurJV3_3915	288.5	1.37083e-93	49.85
balf_cluster_gene_184832_1	700598.Niako_6347	gnl|BL_ORD_ID|8359452 700598.Niako_6347	483.797	1.60821e-169	61.2	magnesium and cobalt transport protein CorA	P
balf_cluster_gene_188474_1	862965.PARA_17900	gnl|BL_ORD_ID|3061805 862965.PARA_17900	744.962	0	97.8	Stereospecific condensation of phosphoenolpyruvate (PEP) and D-erythrose-4-phosphate (E4P) giving rise to 3-deoxy-D- arabino-heptulosonate-7-phosphate (DAHP) (By similarity)	E
balf_cluster_gene_165066_1	596309.RHOER0001_5380	gnl|BL_ORD_ID|9820660 596309.RHOER0001_5380	692.575	0	98.33
balf_cluster_gene_170790_1	553201.ROTMU0001_0121	gnl|BL_ORD_ID|9779489 553201.ROTMU0001_0121	684.871	0	96.35
balf_cluster_gene_177598_1	649742.HMPREF0970_01981	gnl|BL_ORD_ID|14221190 649742.HMPREF0970_01981	560.066	0	84.87
balf_cluster_gene_129332_1	521097.Coch_0432	gnl|BL_ORD_ID|645970 521097.Coch_0432	229.95	2.06722e-69	35.24	NA	S
balf_cluster_gene_135125_1	547045.NEISICOT_02194	gnl|BL_ORD_ID|6155545 547045.NEISICOT_02194	653.284	0	99.38	Fusaric acid resistance protein	S
balf_cluster_gene_217187_1	649742.HMPREF0970_00653	gnl|BL_ORD_ID|14221832 649742.HMPREF0970_00653	748.429	0	93.67
balf_cluster_gene_000197_1	319795.Dgeo_2171	gnl|BL_ORD_ID|9556540 319795.Dgeo_2171	340.887	1.83368e-114	52.6	Aldo keto reductase	C
balf_cluster_gene_198671_1	1007104.SUS17_115	gnl|BL_ORD_ID|1294360 1007104.SUS17_115	468.389	6.84773e-165	71.21	glucokinase (EC 2.7.1.2)	G
balf_cluster_gene_081780_1	889204.HMPREF9423_0973	gnl|BL_ORD_ID|11220944 889204.HMPREF9423_0973	676.781	0	95.27
balf_cluster_gene_180693_1	888052.HMPREF9006_0121	gnl|BL_ORD_ID|8698465 888052.HMPREF9006_0121	700.279	0	97.15	The UvrABC repair system catalyzes the recognition and processing of DNA lesions. UvrA is an ATPase and a DNA-binding protein. A damage recognition complex composed of 2 UvrA and 2 UvrB subunits scans DNA for abnormalities. When the presence of a lesion has been verified by UvrB, the UvrA molecules dissociate (By similarity)	L
balf_cluster_gene_200133_1	562983.HMPREF0433_01147	gnl|BL_ORD_ID|8445145 562983.HMPREF0433_01147	832.017	0	98.78	aminopeptidase	E
balf_cluster_gene_028411_1	531844.FIC_00182	gnl|BL_ORD_ID|4795152 531844.FIC_00182	583.563	0	72.3	Releases the supercoiling and torsional tension of DNA, which is introduced during the DNA replication and transcription, by transiently cleaving and rejoining one strand of the DNA duplex. Introduces a single-strand break via transesterification at a target site in duplex DNA. The scissile phosphodiester is attacked by the catalytic tyrosine of the enzyme, resulting in the formation of a DNA-(5'…	L
balf_cluster_gene_206828_1	441620.Mpop_0687	gnl|BL_ORD_ID|6961644 441620.Mpop_0687	755.747	0	97.44	Glycosyl transferase, family 2	M
balf_cluster_gene_210698_1	317655.Sala_1833	gnl|BL_ORD_ID|255842 317655.Sala_1833	409.068	2.54754e-141	65.14	alcohol dehydrogenase	C
balf_cluster_gene_154955_1	888833.HMPREF9421_0425	gnl|BL_ORD_ID|5953873 888833.HMPREF9421_0425	825.854	0	95.68	peptidase'	O
balf_cluster_gene_213121_1	279238.Saro_0867	gnl|BL_ORD_ID|3555055 279238.Saro_0867	708.368	0	93.62	acetyl-coa acetyltransferase	I
balf_cluster_gene_194624_1	562971.HMPREF0005_02789	gnl|BL_ORD_ID|13843735 562971.HMPREF0005_02789	695.656	0	98.85
balf_cluster_gene_054819_1	596320.NEIFL0001_2213	gnl|BL_ORD_ID|891724 596320.NEIFL0001_2213	678.707	0	97.95
balf_cluster_gene_188126_1	997830.HMPREF1124_1541	gnl|BL_ORD_ID|4483821 997830.HMPREF1124_1541	749.969	0	98.64	Required for a late step of 50S ribosomal subunit assembly. Has GTPase activity (By similarity)	S
balf_cluster_gene_168592_1	657323.CK1_39560	gnl|BL_ORD_ID|6461839 657323.CK1_39560	537.724	0	67.92	malate L-lactate dehydrogenase	C
balf_cluster_gene_182397_1	879309.HMPREF9199_0972	gnl|BL_ORD_ID|1835167 879309.HMPREF9199_0972	728.013	0	97.77	DNA topoisomerase type I activity	L
balf_cluster_gene_136837_1	638301.HMPREF0444_0023	gnl|BL_ORD_ID|2637019 638301.HMPREF0444_0023	646.736	0	98.46	Produces ATP from ADP in the presence of a proton gradient across the membrane. The catalytic sites are hosted primarily by the beta subunits (By similarity)	C
balf_cluster_gene_173392_1	521095.Apar_0380	gnl|BL_ORD_ID|5491545 521095.Apar_0380	612.453	0	94.74	NA	S
balf_cluster_gene_150399_1	546273.VEIDISOL_01899	gnl|BL_ORD_ID|4289578 546273.VEIDISOL_01899	673.315	0	99.71	Major Facilitator	G
balf_cluster_gene_113825_1	411466.ACTODO_01170	gnl|BL_ORD_ID|1772901 411466.ACTODO_01170	764.992	0	96.31	Major Facilitator superfamily	G
balf_cluster_gene_164246_1	441620.Mpop_0731	gnl|BL_ORD_ID|6958299 441620.Mpop_0731	644.04	0	97.04	NA	S
balf_cluster_gene_048200_1	866778.HMPREF9684_0306	gnl|BL_ORD_ID|11624690 866778.HMPREF9684_0306	748.814	0	87.95
balf_cluster_gene_210249_1	323097.Nham_0387	gnl|BL_ORD_ID|257543 323097.Nham_0387	495.738	1.22765e-175	72.7	Type ii secretion system	U
balf_cluster_gene_056880_1	862965.PARA_13240	gnl|BL_ORD_ID|3061799 862965.PARA_13240	759.214	0	96.24	cystathionine	E
balf_cluster_gene_028064_1	316057.RPD_2183	gnl|BL_ORD_ID|4408550 316057.RPD_2183	583.948	0	84.64	(ABC) transporter	P
balf_cluster_gene_199497_1	553219.CAMSH0001_0054	gnl|BL_ORD_ID|7357172 553219.CAMSH0001_0054	650.203	0	96.9	CRISPR (clustered regularly interspaced short palindromic repeat), is an adaptive immune system that provides protection against mobile genetic elements (viruses, transposable elements and conjugative plasmids). CRISPR clusters contain sequences complementary to antecedent mobile elements and target invading nucleic acids. CRISPR clusters are transcribed and processed into CRISPR RNA (crRNA). Act…	L
balf_cluster_gene_173830_1	639283.Snov_0193	gnl|BL_ORD_ID|6266522 639283.Snov_0193	264.618	3.14466e-84	41.82	oxidoreductase	S
balf_cluster_gene_056020_1	706436.HMPREF9074_02089	gnl|BL_ORD_ID|4308614 706436.HMPREF9074_02089	787.334	0	96.2	Molybdenum cofactor synthesis domain protein	H
balf_cluster_gene_118494_1	1037409.BJ6T_11690	gnl|BL_ORD_ID|8423737 1037409.BJ6T_11690	655.596	0	89.07	Catalyzes the conversion of dihydroorotate to orotate	F
balf_cluster_gene_101338_1	1007104.SUS17_2371	gnl|BL_ORD_ID|1295103 1007104.SUS17_2371	346.665	7.69344e-117	52.62	Methyltransferase	S
balf_cluster_gene_176168_1	888052.HMPREF9006_1348	gnl|BL_ORD_ID|8697484 888052.HMPREF9006_1348	674.855	0	97.39	Integral membrane protein (MviN	S
balf_cluster_gene_067958_1	450851.PHZ_c0158	gnl|BL_ORD_ID|7725763 450851.PHZ_c0158	742.265	0	92.75	Succinyl-CoA synthetase subunit beta	C
balf_cluster_gene_027383_1	596309.RHOER0001_1430	gnl|BL_ORD_ID|9825428 596309.RHOER0001_1430	816.609	0	99.06
balf_cluster_gene_225427_1	469621.HMPREF0400_02058	gnl|BL_ORD_ID|10455533 469621.HMPREF0400_02058	709.909	0	99.41
balf_cluster_gene_216994_1	694569.D7S_1436	gnl|BL_ORD_ID|6381010 694569.D7S_1436	376.326	1.27417e-126	51.96	Sel1 domain protein repeat-containing protein	S
balf_cluster_gene_163723_1	658664.HMPREF1004_04379	gnl|BL_ORD_ID|14815476 658664.HMPREF1004_04379	657.907	0	95.78
balf_cluster_gene_233410_1	411477.PARMER_03795	gnl|BL_ORD_ID|3134736 411477.PARMER_03795	387.882	8.63194e-132	52.28	5-enolpyruvylshikimate-3-phosphate phospholyase	E
balf_cluster_gene_166595_1	765698.Mesci_1978	gnl|BL_ORD_ID|2845641 765698.Mesci_1978	589.726	0	73.4	Beta-lactamase	V
balf_cluster_gene_008085_1	402626.Rpic_1197	gnl|BL_ORD_ID|5591471 402626.Rpic_1197	761.911	0	97.42	DegT DnrJ EryC1 StrS aminotransferase	E
balf_cluster_gene_149990_1	553175.POREN0001_1656	gnl|BL_ORD_ID|8275034 553175.POREN0001_1656	812.757	0	95.11	OstA family	S
balf_cluster_gene_043966_1	997830.HMPREF1124_0875	gnl|BL_ORD_ID|4483475 997830.HMPREF1124_0875	808.52	0	99.24	acetate kinase activity	C
balf_cluster_gene_147031_1	450851.PHZ_c0833	gnl|BL_ORD_ID|7725612 450851.PHZ_c0833	659.448	0	85.3	Peptide chain release factor 1 directs the termination of translation in response to the peptide chain termination codons UAG and UAA (By similarity)	J
balf_cluster_gene_044027_1	521095.Apar_0450	gnl|BL_ORD_ID|5491305 521095.Apar_0450	701.434	0	92.29	lipolytic protein G-D-S-L family	S
balf_cluster_gene_205872_1	441620.Mpop_4756	gnl|BL_ORD_ID|6959441 441620.Mpop_4756	703.36	0	98.89	Enoyl-CoA hydratase	I
balf_cluster_gene_037017_1	879309.HMPREF9199_0609	gnl|BL_ORD_ID|1836787 879309.HMPREF9199_0609	712.605	0	95.81	hydrogenase expression formation protein HypD	O
balf_cluster_gene_063460_1	888052.HMPREF9006_0738	gnl|BL_ORD_ID|8697962 888052.HMPREF9006_0738	363.229	8.95244e-121	51.48	5-enolpyruvylshikimate-3-phosphate synthase	E
balf_cluster_gene_150928_1	765120.HMPREF9618_01679	gnl|BL_ORD_ID|14864585 765120.HMPREF9618_01679	672.929	0	100
balf_cluster_gene_063725_1	314253.NB311A_05926	gnl|BL_ORD_ID|7360282 314253.NB311A_05926	575.859	0	70.23
balf_cluster_gene_073750_1	441620.Mpop_0659	gnl|BL_ORD_ID|6961139 441620.Mpop_0659	687.567	0	99.72	Flagellin	N
balf_cluster_gene_222780_1	1045855.DSC_07970	gnl|BL_ORD_ID|3022661 1045855.DSC_07970	528.865	0	66.17	Cupin 4 family protein	S
balf_cluster_gene_158278_1	288000.BBta_5367	gnl|BL_ORD_ID|9071721 288000.BBta_5367	546.199	0	69.23	alcohol dehydrogenase	C
balf_cluster_gene_020050_1	546273.VEIDISOL_01782	gnl|BL_ORD_ID|4288601 546273.VEIDISOL_01782	622.854	0	97.84	Major Facilitator	G
balf_cluster_gene_220996_1	395965.Msil_3430	gnl|BL_ORD_ID|283806 395965.Msil_3430	352.829	8.9158e-118	51.49	alcohol dehydrogenase	C
balf_cluster_gene_198451_1	751586.BDIM_20600	gnl|BL_ORD_ID|2559467 751586.BDIM_20600	468.389	8.44172e-165	75.93	alcohol dehydrogenase	C
balf_cluster_gene_204320_1	649761.HMPREF0973_01363	gnl|BL_ORD_ID|692432 649761.HMPREF0973_01363	717.998	0	91.69	DNA protecting protein DprA	L
balf_cluster_gene_086718_1	693982.Sinme_3920	gnl|BL_ORD_ID|11761345 693982.Sinme_3920	414.846	8.57447e-143	57.75
balf_cluster_gene_080518_1	323097.Nham_0149	gnl|BL_ORD_ID|259686 323097.Nham_0149	689.108	0	85.23	Coproporphyrinogen III oxidase	H
balf_cluster_gene_199985_1	873449.STRCR_0880	gnl|BL_ORD_ID|6273007 873449.STRCR_0880	244.973	6.66604e-70	53.11	Collagen triple helix repeat	S
balf_cluster_gene_082956_1	888833.HMPREF9961_1536	gnl|BL_ORD_ID|5954639 888833.HMPREF9961_1536	741.495	0	95.91
balf_cluster_gene_109434_1	485913.Krac_0136	gnl|BL_ORD_ID|1126540 485913.Krac_0136	144.05	2.28951e-35	18.21	type IV secretion system protein	U
balf_cluster_gene_074253_1	365044.Pnap_3288	gnl|BL_ORD_ID|1893634 365044.Pnap_3288	475.322	9.36906e-167	63.56	portal protein	S
balf_cluster_gene_134458_1	562981.HMPREF0428_00517	gnl|BL_ORD_ID|932504 562981.HMPREF0428_00517	596.66	0	93.35	Involved in DNA double-strand break repair (DSBR). The Rad50 Mre11 complex possesses single-strand endonuclease activity and ATP-dependent double-strand-specific 3'-5' exonuclease activity. Rad50 provides an ATP-dependent control of Mre11 by unwinding and or repositioning DNA ends into the Mre11 active site (By similarity)	L
balf_cluster_gene_175227_1	608534.GCWU000341_00240	gnl|BL_ORD_ID|595107 608534.GCWU000341_00240	228.024	1.60034e-65	30.79	YD repeat protein	M
balf_cluster_gene_167324_1	525268.HMPREF0308_1264	gnl|BL_ORD_ID|9579542 525268.HMPREF0308_1264	667.537	0	78.12	Histidyl-trna synthetase	J
balf_cluster_gene_148968_1	700598.Niako_4943	gnl|BL_ORD_ID|8358166 700598.Niako_4943	717.998	0	91.67	This protein promotes the GTP-dependent binding of aminoacyl-tRNA to the A-site of ribosomes during protein biosynthesis (By similarity)	J
balf_cluster_gene_219079_1	392499.Swit_0631	gnl|BL_ORD_ID|3859592 392499.Swit_0631	299.671	1.23927e-97	50.15	poly(r)-hydroxyalkanoic acid synthase, class	I
balf_cluster_gene_059665_1	452662.SJA_C1-05490	gnl|BL_ORD_ID|6482026 452662.SJA_C1-05490	816.994	0	99.52	Phage integrase family protein	L
balf_cluster_gene_200423_1	553178.CAPGI0001_0415	gnl|BL_ORD_ID|9248266 553178.CAPGI0001_0415	835.869	0	97.83	Catalyzes the GTP-dependent ribosomal translocation step during translation elongation. During this step, the ribosome changes from the pre-translocational (PRE) to the post- translocational (POST) state as the newly formed A-site-bound peptidyl-tRNA and P-site-bound deacylated tRNA move to the P and E sites, respectively. Catalyzes the coordinated movement of the two tRNA molecules, the mRNA and…	J
balf_cluster_gene_103856_1	706433.HMPREF9430_00963	gnl|BL_ORD_ID|2354653 706433.HMPREF9430_00963	452.981	5.47777e-159	57.98	Transposase	L
balf_cluster_gene_191387_1	760570.HMPREF0833_11522	gnl|BL_ORD_ID|13015700 760570.HMPREF0833_11522	778.089	0	97.95
balf_cluster_gene_039742_1	591001.Acfer_0500	gnl|BL_ORD_ID|2161037 591001.Acfer_0500	237.654	6.45531e-74	39.21	Nad-dependent epimerase dehydratase	M
balf_cluster_gene_089693_1	411466.ACTODO_00288	gnl|BL_ORD_ID|1771587 411466.ACTODO_00288	730.709	0	90.23	ATP-dependent carboxylate-amine ligase (By similarity)	S
balf_cluster_gene_049315_1	546266.NEIMUCOT_03733	gnl|BL_ORD_ID|2485452 546266.NEIMUCOT_03733	464.537	3.53963e-162	63.1	relaxase mobilization nuclease domain protein	U
balf_cluster_gene_134984_1	525268.HMPREF0308_1138	gnl|BL_ORD_ID|9578752 525268.HMPREF0308_1138	263.462	2.22056e-82	39.23	acetyltransferase	K
balf_cluster_gene_009753_1	706436.HMPREF9074_02261	gnl|BL_ORD_ID|4305962 706436.HMPREF9074_02261	858.981	0	99.28	Catalytic subunit of the tRNA-splicing ligase complex that acts by directly joining spliced tRNA halves to mature-sized tRNAs by incorporating the precursor-derived splice junction phosphate into the mature tRNA as a canonical 3',5'- phosphodiester. May act as a RNA ligase with broad substrate specificity, and may function toward other RNAs (By similarity)	S
balf_cluster_gene_175894_1	441620.Mpop_1636	gnl|BL_ORD_ID|6959611 441620.Mpop_1636	768.844	0	97.99	biosynthesis protein CelD	M
balf_cluster_gene_020057_1	1003200.AXXA_07924	gnl|BL_ORD_ID|3457133 1003200.AXXA_07924	574.318	0	88.58	Major Facilitator superfamily	G
balf_cluster_gene_054134_1	866776.HMPREF9321_0495	gnl|BL_ORD_ID|1335660 866776.HMPREF9321_0495	672.544	0	99.38	Diaminopimelate dehydrogenase	E
balf_cluster_gene_000928_1	658664.HMPREF1004_01496	gnl|BL_ORD_ID|14816851 658664.HMPREF1004_01496	663.3	0	95.56
balf_cluster_gene_178165_1	1005705.HMPREF9967_1562	gnl|BL_ORD_ID|7527198 1005705.HMPREF9967_1562	630.558	0	94.79	Catalyzes the addition and repair of the essential 3'- terminal CCA sequence in tRNAs without using a nucleic acid template. Adds these three nucleotides in the order of C, C, and A to the tRNA nucleotide-73, using CTP and ATP as substrates and producing inorganic pyrophosphate	J
balf_cluster_gene_153194_1	706436.HMPREF9074_01656	gnl|BL_ORD_ID|4304429 706436.HMPREF9074_01656	676.396	0	95.95	NA	S
balf_cluster_gene_058298_1	457392.BSHG_00285	gnl|BL_ORD_ID|14401277 457392.BSHG_00285	243.817	7.86268e-74	36.71
balf_cluster_gene_094831_1	857575.E9S_06438	gnl|BL_ORD_ID|13067110 857575.E9S_06438	758.829	0	99.48
balf_cluster_gene_062438_1	700598.Niako_6245	gnl|BL_ORD_ID|8361148 700598.Niako_6245	580.867	0	78.2	radical SAM domain protein	S
balf_cluster_gene_065090_1	596309.RHOER0001_0851	gnl|BL_ORD_ID|9822613 596309.RHOER0001_0851	681.789	0	99.4
balf_cluster_gene_111251_1	706436.HMPREF9074_05653	gnl|BL_ORD_ID|4308032 706436.HMPREF9074_05653	811.987	0	97.54	NA	S
balf_cluster_gene_047913_1	680646.RMDY18_00710	gnl|BL_ORD_ID|6600281 680646.RMDY18_00710	796.579	0	97.07	transporter	E
balf_cluster_gene_018402_1	525260.HMPREF0276_1501	gnl|BL_ORD_ID|2136161 525260.HMPREF0276_1501	640.188	0	99.07	May play a role in 30S ribosomal subunit biogenesis. Unusual circulary permuted GTPase that catalyzes rapid hydrolysis of GTP with a slow catalytic turnover (By similarity)	S
balf_cluster_gene_053097_1	1037409.BJ6T_00950	gnl|BL_ORD_ID|8419281 1037409.BJ6T_00950	573.163	0	83.23	Dehydrogenase	C
balf_cluster_gene_116313_1	523794.Lebu_1919	gnl|BL_ORD_ID|976231 523794.Lebu_1919	785.408	0	97.72	This protein promotes the GTP-dependent binding of aminoacyl-tRNA to the A-site of ribosomes during protein biosynthesis (By similarity)	J
balf_cluster_gene_205832_1	526982.bcere0018_53400	gnl|BL_ORD_ID|11618905 526982.bcere0018_53400	164.851	2.39847e-44	29.43
balf_cluster_gene_192841_1	411466.ACTODO_00604	gnl|BL_ORD_ID|1771101 411466.ACTODO_00604	434.876	4.95071e-146	66.67	NA	S
balf_cluster_gene_061136_1	638301.HMPREF0444_1288	gnl|BL_ORD_ID|2635301 638301.HMPREF0444_1288	665.611	0	96.74	Part of the ABC transporter complex PotABCD involved in spermidine putrescine import. Responsible for energy coupling to the transport system (By similarity)	E
balf_cluster_gene_078391_1	114615.BRADO6813	gnl|BL_ORD_ID|5757654 114615.BRADO6813	698.738	0	80.94	Nadh dehydrogenase	C
balf_cluster_gene_147809_1	686660.HMPREF1035_1007	gnl|BL_ORD_ID|14659823 686660.HMPREF1035_1007	650.588	0	99.38
balf_cluster_gene_075993_1	1037409.BJ6T_47190	gnl|BL_ORD_ID|8422278 1037409.BJ6T_47190	550.821	0	75.14	Catalyzes the oxidation of the C8 methyl side group on heme O porphyrin ring into a formyl group (By similarity)	O
balf_cluster_gene_168601_1	693978.Riean_1717	gnl|BL_ORD_ID|14628390 693978.Riean_1717	453.751	2.88088e-158	63.27
balf_cluster_gene_051201_1	224911.bll4799	gnl|BL_ORD_ID|7498542 224911.bll4799	585.104	0	76.43	Major Facilitator superfamily	G
balf_cluster_gene_016404_1	596320.NEIFL0001_1335	gnl|BL_ORD_ID|891541 596320.NEIFL0001_1335	736.487	0	97.79	CRISPR-associated helicase, cas3	L
balf_cluster_gene_168232_1	658664.HMPREF1004_00884	gnl|BL_ORD_ID|14817518 658664.HMPREF1004_00884	561.222	0	83.93
balf_cluster_gene_000205_1	658664.HMPREF1004_03267	gnl|BL_ORD_ID|14816214 658664.HMPREF1004_03267	652.899	0	95.76
balf_cluster_gene_226222_1	391625.PPSIR1_30310	gnl|BL_ORD_ID|7988990 391625.PPSIR1_30310	118.627	4.90664e-28	28.99
balf_cluster_gene_223461_1	392499.Swit_0244	gnl|BL_ORD_ID|3861094 392499.Swit_0244	432.18	8.08892e-149	64.89	Catalyzes the formation of 4-diphosphocytidyl-2-C- methyl-D-erythritol from CTP and 2-C-methyl-D-erythritol 4- phosphate (MEP) (By similarity)	I
balf_cluster_gene_038983_1	266835.mlr2754	gnl|BL_ORD_ID|7530508 266835.mlr2754	681.789	0	91.18	NA	S
balf_cluster_gene_177342_1	862719.AZOLI_1610	gnl|BL_ORD_ID|8281262 862719.AZOLI_1610	191.43	7.75642e-52	38.57	Histidine kinase	T
balf_cluster_gene_011072_1	521095.Apar_0004	gnl|BL_ORD_ID|5490866 521095.Apar_0004	715.687	0	94.51	it is required for DNA replication and normal SOS inducibility. RecF binds preferentially to single-stranded, linear DNA. It also seems to bind ATP (By similarity)	L
balf_cluster_gene_101815_1	649754.HMPREF0281_00400	gnl|BL_ORD_ID|3230770 649754.HMPREF0281_00400	439.884	1.34216e-153	63.08	Catalyzes the dephosphorylation of undecaprenyl diphosphate (UPP). Confers resistance to bacitracin (By similarity)	V
balf_cluster_gene_220369_1	665954.HMPREF1017_01114	gnl|BL_ORD_ID|12271281 665954.HMPREF1017_01114	442.58	2.24981e-140	62.43
balf_cluster_gene_204183_1	573061.Clocel_4257	gnl|BL_ORD_ID|6998233 573061.Clocel_4257	75.8702	2.98967e-12	20.96	Lantibiotic dehydratase, C terminus	S
balf_cluster_gene_065310_1	203275.BFO_1326	gnl|BL_ORD_ID|9403925 203275.BFO_1326	513.072	0	69.57	gliding motility protein gldn	S
balf_cluster_gene_153526_1	562971.HMPREF0005_01840	gnl|BL_ORD_ID|13841187 562971.HMPREF0005_01840	726.857	0	97.89
balf_cluster_gene_008171_1	553220.CAMGR0001_1860	gnl|BL_ORD_ID|4665027 553220.CAMGR0001_1860	360.918	8.63069e-121	48.54	fad dependent oxidoreductase	S
balf_cluster_gene_133994_1	562971.HMPREF0005_05287	gnl|BL_ORD_ID|13842079 562971.HMPREF0005_05287	578.941	0	81.82
balf_cluster_gene_105511_1	857575.E9S_04427	gnl|BL_ORD_ID|13066738 857575.E9S_04427	504.597	1.93784e-177	66.12
balf_cluster_gene_173897_1	553201.ROTMU0001_0574	gnl|BL_ORD_ID|9778848 553201.ROTMU0001_0574	205.297	7.15621e-61	43.96
balf_cluster_gene_207654_1	469589.HMPREF0103_3733	gnl|BL_ORD_ID|12611499 469589.HMPREF0103_3733	545.814	0	70.38
balf_cluster_gene_138580_1	546273.VEIDISOL_01609	gnl|BL_ORD_ID|4288315 546273.VEIDISOL_01609	700.664	0	98.83	Transfers and isomerizes the ribose moiety from AdoMet to the 7-aminomethyl group of 7-deazaguanine (preQ1-tRNA) to give epoxyqueuosine (oQ-tRNA) (By similarity)	J
balf_cluster_gene_019845_1	360105.CCV52592_2064	gnl|BL_ORD_ID|2687847 360105.CCV52592_2064	545.428	0	73.31	5-enolpyruvylshikimate-3-phosphate phospholyase	E
balf_cluster_gene_182097_1	888833.HMPREF9421_0727	gnl|BL_ORD_ID|5953558 888833.HMPREF9421_0727	728.783	0	98.61	oxidoreductase activity, acting on the CH-NH2 group of donors, NAD or NADP as acceptor	E
balf_cluster_gene_167559_1	388413.ALPR1_02205	gnl|BL_ORD_ID|7505409 388413.ALPR1_02205	173.711	3.04099e-45	28.49	Histidine kinase	T
balf_cluster_gene_149354_1	866776.HMPREF9321_0622	gnl|BL_ORD_ID|1336183 866776.HMPREF9321_0622	714.916	0	98.56	radical SAM domain protein	C
balf_cluster_gene_089509_1	441620.Mpop_1266	gnl|BL_ORD_ID|6958372 441620.Mpop_1266	731.095	0	98.38	Spore maturation protein	S
balf_cluster_gene_025919_1	546263.NEIELOOT_00042	gnl|BL_ORD_ID|5508964 546263.NEIELOOT_00042	743.806	0	97.53	ribonuclease	J
balf_cluster_gene_008320_1	224911.blr0149	gnl|BL_ORD_ID|7502550 224911.blr0149	588.956	0	73.52	Subunits I and II form the functional core of the enzyme complex. Electrons originating in cytochrome c are transferred via heme a and Cu(A) to the binuclear center formed by heme a3 and Cu(B) (By similarity)	C
balf_cluster_gene_182208_1	196164.HMPREF0290_1004	gnl|BL_ORD_ID|8644150 196164.HMPREF0290_1004	459.529	7.67919e-159	55.64	l-carnitine dehydratase bile acid-inducible protein F	C
balf_cluster_gene_159010_1	1037409.BJ6T_65900	gnl|BL_ORD_ID|8423753 1037409.BJ6T_65900	500.745	4.89168e-178	74.38	Dehydrogenase	I
balf_cluster_gene_117052_1	649742.HMPREF0970_01217	gnl|BL_ORD_ID|14220412 649742.HMPREF0970_01217	829.321	0	97.53
balf_cluster_gene_206579_1	1048332.SALIVB_0548	gnl|BL_ORD_ID|11804618 1048332.SALIVB_0548	840.106	0	97.6
balf_cluster_gene_147775_1	521095.Apar_0819	gnl|BL_ORD_ID|5491153 521095.Apar_0819	793.497	0	93.56	Catalyzes the transfer of the gamma-phosphate of ATP to D-galactose to form alpha-D-galactose-1-phosphate (Gal-1-P) (By similarity)	G
balf_cluster_gene_047570_1	546268.NEISUBOT_03331	gnl|BL_ORD_ID|3025324 546268.NEISUBOT_03331	764.222	0	95.26	CDP-glycerol poly(glycerophosphate) glycerophosphotransferase	M
balf_cluster_gene_035999_1	428406.Rpic12D_3705	gnl|BL_ORD_ID|13823159 428406.Rpic12D_3705	575.089	0	84.27
balf_cluster_gene_057784_1	450851.PHZ_c0439	gnl|BL_ORD_ID|7727593 450851.PHZ_c0439	672.159	0	83.59	homoserine O-acetyltransferase	E
balf_cluster_gene_049027_1	525246.HMPREF0058_1994	gnl|BL_ORD_ID|9181424 525246.HMPREF0058_1994	580.096	0	83.67	Converts 1-hydroxy-2-methyl-2-(E)-butenyl 4-diphosphate into isopentenyl diphosphate (IPP) and dimethylallyl diphosphate (DMAPP) (By similarity)	I
balf_cluster_gene_054600_1	879309.HMPREF9199_0180	gnl|BL_ORD_ID|1835295 879309.HMPREF9199_0180	674.855	0	99.09	tryptophanyltRNA synthetase	J
balf_cluster_gene_150072_1	314266.SKA58_18660	gnl|BL_ORD_ID|8818069 314266.SKA58_18660	593.964	0	94.93	Major Facilitator Superfamily	G
balf_cluster_gene_176491_1	546264.NEIFLAOT_01342	gnl|BL_ORD_ID|4570147 546264.NEIFLAOT_01342	789.26	0	90.87	major facilitator Superfamily	G
balf_cluster_gene_031936_1	450851.PHZ_c2773	gnl|BL_ORD_ID|7726191 450851.PHZ_c2773	681.019	0	83.09	acyl-CoA dehydrogenase	I
balf_cluster_gene_025107_1	522373.Smlt2689	gnl|BL_ORD_ID|642415 522373.Smlt2689	492.656	2.7965e-174	69.01	Cyclase family	S
balf_cluster_gene_072185_1	562983.HMPREF0433_00847	gnl|BL_ORD_ID|8446665 562983.HMPREF0433_00847	458.759	8.75914e-161	71.3	Ornithine Cyclodeaminase	E
balf_cluster_gene_118640_1	546266.NEIMUCOT_05366	gnl|BL_ORD_ID|2485683 546266.NEIMUCOT_05366	356.295	2.056e-118	45.91	Cell wall formation. Adds enolpyruvyl to UDP-N- acetylglucosamine (By similarity)	M
balf_cluster_gene_188196_1	762963.HMPREF9056_01404	gnl|BL_ORD_ID|2996777 762963.HMPREF9056_01404	716.457	0	97.77	Transaldolase is important for the balance of metabolites in the pentose-phosphate pathway (By similarity)	G
balf_cluster_gene_037757_1	866778.HMPREF9684_0389	gnl|BL_ORD_ID|11624770 866778.HMPREF9684_0389	787.334	0	99.74
balf_cluster_gene_043397_1	1037409.BJ6T_67640	gnl|BL_ORD_ID|8418883 1037409.BJ6T_67640	687.567	0	80.82	amine oxidase	S
balf_cluster_gene_004389_1	450851.PHZ_c3245	gnl|BL_ORD_ID|7728108 450851.PHZ_c3245	654.055	0	81.77	acetyl-coa acetyltransferase	I
balf_cluster_gene_067339_1	675635.Psed_5255	gnl|BL_ORD_ID|9500000 675635.Psed_5255	588.186	0	72.14	acyl-CoA dehydrogenase	I
balf_cluster_gene_124789_1	340100.Bpet4309	gnl|BL_ORD_ID|4579827 340100.Bpet4309	657.907	0	80.76	NA	S
balf_cluster_gene_171203_1	596309.RHOER0001_3766	gnl|BL_ORD_ID|9824149 596309.RHOER0001_3766	849.351	0	99.3
balf_cluster_gene_142364_1	944560.HMPREF9058_1268	gnl|BL_ORD_ID|6431907 944560.HMPREF9058_1268	703.745	0	95.42	Methylates the class 1 translation termination release factors RF1 PrfA and RF2 PrfB on the glutamine residue of the universally conserved GGQ motif (By similarity)	J
balf_cluster_gene_143665_1	888828.HMPREF9417_0788	gnl|BL_ORD_ID|10730765 888828.HMPREF9417_0788	779.245	0	98.96
balf_cluster_gene_131285_1	866778.HMPREF9684_1824	gnl|BL_ORD_ID|11624976 866778.HMPREF9684_1824	260.381	3.25633e-80	41.69
balf_cluster_gene_045327_1	366602.Caul_2355	gnl|BL_ORD_ID|5861992 366602.Caul_2355	468.003	2.28898e-156	64.47	TonB-dependent receptor	P
balf_cluster_gene_102458_1	562971.HMPREF0005_01567	gnl|BL_ORD_ID|13843055 562971.HMPREF0005_01567	683.715	0	99.41
balf_cluster_gene_168669_1	562973.HMPREF0059_02207	gnl|BL_ORD_ID|12553317 562973.HMPREF0059_02207	709.909	0	93.6
balf_cluster_gene_016131_1	709797.CSIRO_0178	gnl|BL_ORD_ID|7185558 709797.CSIRO_0178	786.178	0	94.51	aminotransferase	E
balf_cluster_gene_209048_1	888828.HMPREF9417_1656	gnl|BL_ORD_ID|10730219 888828.HMPREF9417_1656	651.744	0	97.86
balf_cluster_gene_089114_1	680646.RMDY18_11880	gnl|BL_ORD_ID|6601018 680646.RMDY18_11880	601.668	0	91.79
balf_cluster_gene_172573_1	234621.RER_43430	gnl|BL_ORD_ID|5200046 234621.RER_43430	727.628	0	99.47	permease protein	P
balf_cluster_gene_045621_1	224911.bll6352	gnl|BL_ORD_ID|7503323 224911.bll6352	672.544	0	90.78	Part of the ABC transporter complex PotABCD involved in spermidine putrescine import. Responsible for energy coupling to the transport system (By similarity)	E
balf_cluster_gene_101041_1	866778.HMPREF9684_1203	gnl|BL_ORD_ID|11625528 866778.HMPREF9684_1203	787.334	0	99.48
balf_cluster_gene_077715_1	680646.RMDY18_10700	gnl|BL_ORD_ID|6599474 680646.RMDY18_10700	728.783	0	98.07	transcriptional	K
balf_cluster_gene_167868_1	279238.Saro_3307	gnl|BL_ORD_ID|3557187 279238.Saro_3307	610.142	0	76.32	Major Facilitator superfamily	G
balf_cluster_gene_038029_1	751586.BDIM_11320	gnl|BL_ORD_ID|2557810 751586.BDIM_11320	689.493	0	83.78	amidohydrolase	Q
balf_cluster_gene_205047_1	680646.RMDY18_15030	gnl|BL_ORD_ID|6599638 680646.RMDY18_15030	818.92	0	98.76	Glycosyl transferase (Group 1	M
balf_cluster_gene_226411_1	392499.Swit_2153	gnl|BL_ORD_ID|3859116 392499.Swit_2153	214.927	5.10412e-65	41.84	NA	S
balf_cluster_gene_183458_1	658664.HMPREF1004_00660	gnl|BL_ORD_ID|14819775 658664.HMPREF1004_00660	552.362	0	95.05
balf_cluster_gene_137843_1	888048.HMPREF8577_1957	gnl|BL_ORD_ID|4165336 888048.HMPREF8577_1957	787.719	0	100	Fe-S assembly protein	O
balf_cluster_gene_163166_1	649742.HMPREF0970_00892	gnl|BL_ORD_ID|14221724 649742.HMPREF0970_00892	725.317	0	85.85
balf_cluster_gene_059406_1	411465.PEPMIC_01489	gnl|BL_ORD_ID|3751135 411465.PEPMIC_01489	803.127	0	100	magnesium ion transmembrane transporter activity	P
balf_cluster_gene_226798_1	1037409.BJ6T_36130	gnl|BL_ORD_ID|8419966 1037409.BJ6T_36130	624.78	0	70.66	acyl-Coa dehydrogenase	I
balf_cluster_gene_143239_1	862965.PARA_16900	gnl|BL_ORD_ID|3062700 862965.PARA_16900	669.463	0	98.5	Anthranilate phosphoribosyltransferase	E
balf_cluster_gene_208054_1	553201.ROTMU0001_0485	gnl|BL_ORD_ID|9778765 553201.ROTMU0001_0485	615.535	0	88.75
balf_cluster_gene_220551_1	441620.Mpop_1697	gnl|BL_ORD_ID|6961791 441620.Mpop_1697	667.537	0	98.22	alcohol dehydrogenase	C
balf_cluster_gene_059363_1	864567.HMPREF8571_0424	gnl|BL_ORD_ID|3424277 864567.HMPREF8571_0424	642.499	0	90.91	Alpha-keto-beta-hydroxylacyl reductoisomerase	E
balf_cluster_gene_032860_1	633149.Bresu_1728	gnl|BL_ORD_ID|7575918 633149.Bresu_1728	563.918	0	82.83	Membrane bOund o-acyl transferase mboat family protein	M
balf_cluster_gene_097188_1	562981.HMPREF0428_00770	gnl|BL_ORD_ID|932499 562981.HMPREF0428_00770	604.364	0	92	major facilitator Superfamily	G
balf_cluster_gene_012331_1	596320.NEIFL0001_2330	gnl|BL_ORD_ID|891545 596320.NEIFL0001_2330	850.121	0	98.57	Phosphoribosylglycinamide synthetase	F
balf_cluster_gene_040927_1	562971.HMPREF0005_03126	gnl|BL_ORD_ID|13840861 562971.HMPREF0005_03126	644.425	0	99.69
balf_cluster_gene_021623_1	224911.bll6727	gnl|BL_ORD_ID|7495809 224911.bll6727	683.715	0	88.28	Major Facilitator superfamily	G
balf_cluster_gene_152449_1	649761.HMPREF0973_00661	gnl|BL_ORD_ID|692425 649761.HMPREF0973_00661	646.351	0	91.83
balf_cluster_gene_004249_1	1007104.SUS17_4001	gnl|BL_ORD_ID|1294654 1007104.SUS17_4001	459.914	1.41968e-160	71.07	it is required for DNA replication and normal SOS inducibility. RecF binds preferentially to single-stranded, linear DNA. It also seems to bind ATP (By similarity)	L
balf_cluster_gene_146163_1	857572.E9Y_01525	gnl|BL_ORD_ID|12832344 857572.E9Y_01525	731.48	0	99.73
balf_cluster_gene_162605_1	997353.HMPREF9144_0289	gnl|BL_ORD_ID|8557497 997353.HMPREF9144_0289	656.366	0	99.39	synthase	H
balf_cluster_gene_037880_1	997353.HMPREF9144_0685	gnl|BL_ORD_ID|8558738 997353.HMPREF9144_0685	781.556	0	98.97	Histidine kinase	T
balf_cluster_gene_039201_1	226186.BT_3881	gnl|BL_ORD_ID|7918841 226186.BT_3881	93.9745	1.54598e-18	26.65
balf_cluster_gene_061559_1	765698.Mesci_3463	gnl|BL_ORD_ID|2841325 765698.Mesci_3463	618.231	0	73.49	domain protein	S
balf_cluster_gene_012667_1	888832.HMPREF9420_1647	gnl|BL_ORD_ID|2456268 888832.HMPREF9420_1647	748.814	0	99.72	NAD-binding protein involved in the addition of a carboxymethylaminomethyl (cmnm) group at the wobble position (U34) of certain tRNAs, forming tRNA-cmnm(5)s(2)U34 (By similarity)	D
balf_cluster_gene_076078_1	399726.Teth514_1540	gnl|BL_ORD_ID|12040446 399726.Teth514_1540	360.918	7.62419e-118	51.96
balf_cluster_gene_172393_1	441620.Mpop_0900	gnl|BL_ORD_ID|6962572 441620.Mpop_0900	677.167	0	96.75	cytochrome C peroxidase	P
balf_cluster_gene_022353_1	765698.Mesci_3113	gnl|BL_ORD_ID|2844065 765698.Mesci_3113	685.256	0	85.27	l-carnitine dehydratase bile acid-inducible protein F	C
balf_cluster_gene_193074_1	1037409.BJ6T_82960	gnl|BL_ORD_ID|8422358 1037409.BJ6T_82960	464.537	1.05198e-162	68.7	cytochrome C peroxidase	P
balf_cluster_gene_228006_1	702113.PP1Y_AT30803	gnl|BL_ORD_ID|4884519 702113.PP1Y_AT30803	506.908	4.11438e-180	76.99	Glutaminase	E
balf_cluster_gene_010294_1	317655.Sala_2332	gnl|BL_ORD_ID|255580 317655.Sala_2332	435.261	4.03994e-152	65.74	fatty acid hydroxylase	I
balf_cluster_gene_157750_1	553206.CORTU0001_1978	gnl|BL_ORD_ID|12646568 553206.CORTU0001_1978	276.174	3.43051e-89	46.27
balf_cluster_gene_143386_1	546266.NEIMUCOT_04218	gnl|BL_ORD_ID|2482979 546266.NEIMUCOT_04218	845.884	0	97.58	receptor	P
balf_cluster_gene_060669_1	649742.HMPREF0970_00284	gnl|BL_ORD_ID|14220636 649742.HMPREF0970_00284	414.846	6.55942e-140	49.39
balf_cluster_gene_224575_1	649742.HMPREF0970_01216	gnl|BL_ORD_ID|14220411 649742.HMPREF0970_01216	573.933	0	82.42
balf_cluster_gene_135335_1	596309.RHOER0001_0119	gnl|BL_ORD_ID|9819883 596309.RHOER0001_0119	648.277	0	99.39
balf_cluster_gene_182510_1	279238.Saro_1375	gnl|BL_ORD_ID|3557060 279238.Saro_1375	627.476	0	84.72	Catalyzes the NADP-dependent rearrangement and reduction of 1-deoxy-D-xylulose-5-phosphate (DXP) to 2-C-methyl-D-erythritol 4-phosphate (MEP) (By similarity)	I
balf_cluster_gene_205761_1	411684.HPDFL43_09502	gnl|BL_ORD_ID|3538395 411684.HPDFL43_09502	242.662	3.93588e-76	37.28	Mg2 transport protein CorA	S
balf_cluster_gene_190715_1	889204.HMPREF9423_1813	gnl|BL_ORD_ID|11220645 889204.HMPREF9423_1813	711.835	0	99.43
balf_cluster_gene_167708_1	709797.CSIRO_0855	gnl|BL_ORD_ID|7183462 709797.CSIRO_0855	634.024	0	91.36	(ABC) transporter	S
balf_cluster_gene_212153_1	936154.STP_1201	gnl|BL_ORD_ID|10118865 936154.STP_1201	365.155	7.47173e-122	47.81
balf_cluster_gene_080797_1	866776.HMPREF9321_0413	gnl|BL_ORD_ID|1336765 866776.HMPREF9321_0413	772.311	0	89.56	amidohydrolase	E
balf_cluster_gene_057255_1	553201.ROTMU0001_0656	gnl|BL_ORD_ID|9778921 553201.ROTMU0001_0656	630.943	0	83.84
balf_cluster_gene_210521_1	706433.HMPREF9430_01247	gnl|BL_ORD_ID|2353694 706433.HMPREF9430_01247	850.121	0	99.5	Provides the precursors necessary for DNA synthesis. Catalyzes the biosynthesis of deoxyribonucleotides from the corresponding ribonucleotides (By similarity)	F
balf_cluster_gene_132144_1	562971.HMPREF0005_02741	gnl|BL_ORD_ID|13842711 562971.HMPREF0005_02741	664.84	0	99.69
balf_cluster_gene_211789_1	441620.Mpop_0595	gnl|BL_ORD_ID|6962174 441620.Mpop_0595	661.759	0	94.18	Heparinase II/III-like protein	S
balf_cluster_gene_040229_1	237727.NAP1_09437	gnl|BL_ORD_ID|7315109 237727.NAP1_09437	538.88	0	69.08	Catalyzes the formation of the isocyclic ring in chlorophyll biosynthesis. Mediates the cyclase reaction, which results in the formation of divinylprotochlorophyllide (Pchlide) characteristic of all chlorophylls from magnesium-protoporphyrin IX 13-monomethyl ester (MgPMME) (By similarity)	H
balf_cluster_gene_117399_1	525268.HMPREF0308_1731	gnl|BL_ORD_ID|9581106 525268.HMPREF0308_1731	485.337	9.20947e-169	58.81	succinyl-diaminopimelate desuccinylase activity	E
balf_cluster_gene_100437_1	596315.HMPREF0634_0400	gnl|BL_ORD_ID|5779572 596315.HMPREF0634_0400	816.994	0	98.25	aminotransferase	E
balf_cluster_gene_158038_1	862965.PARA_12600	gnl|BL_ORD_ID|3061579 862965.PARA_12600	788.104	0	98.96	Prephenate dehydratase	E
balf_cluster_gene_067183_1	1003200.AXXA_09593	gnl|BL_ORD_ID|3459006 1003200.AXXA_09593	637.106	0	86.44	dTDP-glucose 4-6-dehydratase	M
balf_cluster_gene_023348_1	311403.Arad_4812	gnl|BL_ORD_ID|8120758 311403.Arad_4812	387.111	1.84431e-132	58.01
balf_cluster_gene_022893_1	743720.Psefu_2983	gnl|BL_ORD_ID|538061 743720.Psefu_2983	157.532	7.16688e-43	37.61	Anti-feci sigma factor, fecr	T
balf_cluster_gene_089021_1	706436.HMPREF9074_03192	gnl|BL_ORD_ID|4307937 706436.HMPREF9074_03192	639.417	0	96.3	NA	S
balf_cluster_gene_015510_1	638301.HMPREF0444_1230	gnl|BL_ORD_ID|2636795 638301.HMPREF0444_1230	810.446	0	92.79	Capsule synthesis protein	M
balf_cluster_gene_164804_1	1033810.HLPCO_02785	gnl|BL_ORD_ID|6827067 1033810.HLPCO_02785	187.193	2.68638e-53	32.05	Cell wall formation. Catalyzes the transfer of a GlcNAc subunit on undecaprenyl-pyrophosphoryl-MurNAc-pentapeptide (lipid intermediate I) to form undecaprenyl-pyrophosphoryl-MurNAc- (pentapeptide)GlcNAc (lipid intermediate II) (By similarity)	M
balf_cluster_gene_111448_1	888052.HMPREF9006_1493	gnl|BL_ORD_ID|8698944 888052.HMPREF9006_1493	317.005	1.74273e-102	46.36
balf_cluster_gene_170260_1	622637.Met49242DRAFT_0362	gnl|BL_ORD_ID|5928126 622637.Met49242DRAFT_0362	265.388	2.01136e-82	37.53	Type ii secretion system	U
balf_cluster_gene_106335_1	649742.HMPREF0970_00778	gnl|BL_ORD_ID|14221777 649742.HMPREF0970_00778	204.527	4.88951e-58	37
balf_cluster_gene_086551_1	997830.HMPREF1124_0812	gnl|BL_ORD_ID|4483196 997830.HMPREF1124_0812	677.167	0	98.8	succinyl-diaminopimelate desuccinylase activity	E
balf_cluster_gene_028662_1	857578.E9M_08338	gnl|BL_ORD_ID|11785969 857578.E9M_08338	432.18	2.31682e-150	60.96
balf_cluster_gene_039612_1	317655.Sala_1427	gnl|BL_ORD_ID|254582 317655.Sala_1427	469.544	1.62019e-164	66.85	Dihydroorotase	F
balf_cluster_gene_122966_1	596309.RHOER0001_2077	gnl|BL_ORD_ID|9824622 596309.RHOER0001_2077	717.227	0	98.91
balf_cluster_gene_037199_1	288000.BBta_2408	gnl|BL_ORD_ID|9075399 288000.BBta_2408	294.278	6.86375e-95	42.4	Beta-lactamase	V
balf_cluster_gene_156739_1	715226.ABI_26520	gnl|BL_ORD_ID|6577887 715226.ABI_26520	162.925	3.34191e-42	27.94	secreted protein	S
balf_cluster_gene_112751_1	709986.Deima_0403	gnl|BL_ORD_ID|5825604 709986.Deima_0403	354.755	8.31341e-120	54.98	membrane protein terC	P
balf_cluster_gene_192700_1	546263.NEIELOOT_00082	gnl|BL_ORD_ID|5509447 546263.NEIELOOT_00082	694.886	0	92.97	Transaldolase is important for the balance of metabolites in the pentose-phosphate pathway (By similarity)	G
balf_cluster_gene_083841_1	709797.CSIRO_3134	gnl|BL_ORD_ID|7186425 709797.CSIRO_3134	645.966	0	96.4	Fructose-1,6-bisphosphatase	G
balf_cluster_gene_153719_1	266835.mlr3332	gnl|BL_ORD_ID|7532006 266835.mlr3332	499.975	6.58269e-177	71.39	Aldo keto reductase	C
balf_cluster_gene_214189_1	547045.NEISICOT_00668	gnl|BL_ORD_ID|6155637 547045.NEISICOT_00668	679.478	0	84.39	metallocarboxypeptidase activity	E
balf_cluster_gene_176233_1	441620.Mpop_4390	gnl|BL_ORD_ID|6961877 441620.Mpop_4390	714.531	0	99.71	citrate lyase	G
balf_cluster_gene_102598_1	411466.ACTODO_00249	gnl|BL_ORD_ID|1772198 411466.ACTODO_00249	776.933	0	95	acetate kinase activity	C
balf_cluster_gene_131745_1	279238.Saro_1840	gnl|BL_ORD_ID|3555196 279238.Saro_1840	747.273	0	93.18	DNA methylase n-4 n-6 domain protein	L
balf_cluster_gene_182321_1	638301.HMPREF0444_0548	gnl|BL_ORD_ID|2635506 638301.HMPREF0444_0548	616.305	0	93.03	DNA polymerase III (alpha subunit)	L
balf_cluster_gene_179461_1	331271.Bcen_4055	gnl|BL_ORD_ID|13506480 331271.Bcen_4055	619.002	0	73.8
balf_cluster_gene_046311_1	435837.HMPREF0798_02056	gnl|BL_ORD_ID|9149495 435837.HMPREF0798_02056	129.798	2.05329e-32	29.14	Replication initiator protein	S
balf_cluster_gene_164963_1	298653.Franean1_6962	gnl|BL_ORD_ID|8141076 298653.Franean1_6962	347.821	6.75404e-116	58.66	ABC transporter (permease)	V
balf_cluster_gene_099091_1	979556.MTES_0613	gnl|BL_ORD_ID|6346286 979556.MTES_0613	464.922	1.72198e-162	71.04	Mannitol dehydrogenase	G
balf_cluster_gene_048803_1	888052.HMPREF9006_1374	gnl|BL_ORD_ID|8697356 888052.HMPREF9006_1374	571.237	0	79	parb-like partition protein	K
balf_cluster_gene_072280_1	228405.HNE_3287	gnl|BL_ORD_ID|7263150 228405.HNE_3287	464.151	2.56631e-163	68.32	2-Nitropropane dioxygenase	S
balf_cluster_gene_011174_1	224911.blr6699	gnl|BL_ORD_ID|7500733 224911.blr6699	596.66	0	78.8	mandelate racemase muconate lactonizing	M
balf_cluster_gene_034169_1	246199.CUS_5479	gnl|BL_ORD_ID|9317283 246199.CUS_5479	416.772	1.9084e-143	59.02	stage II sporulation protein E	T
balf_cluster_gene_218639_1	749219.MCR_0531	gnl|BL_ORD_ID|12939201 749219.MCR_0531	758.059	0	99.73
balf_cluster_gene_084945_1	862962.BF638R_1223	gnl|BL_ORD_ID|11685667 862962.BF638R_1223	753.436	0	90.12
balf_cluster_gene_166460_1	866778.HMPREF9684_1872	gnl|BL_ORD_ID|11625547 866778.HMPREF9684_1872	858.981	0	96.01
balf_cluster_gene_216039_1	553219.CAMSH0001_1625	gnl|BL_ORD_ID|7358268 553219.CAMSH0001_1625	799.66	0	98	DNA topoisomerase type I activity	L
balf_cluster_gene_046980_1	441620.Mpop_2801	gnl|BL_ORD_ID|6959169 441620.Mpop_2801	812.757	0	99.75	synthase	I
balf_cluster_gene_026579_1	888056.HMPREF9062_0353	gnl|BL_ORD_ID|1729089 888056.HMPREF9062_0353	365.54	1.55723e-121	57.14	parb-like partition protein	K
balf_cluster_gene_076922_1	240016.VspiD_010100005870	gnl|BL_ORD_ID|6835339 240016.VspiD_010100005870	137.502	1.33184e-34	34.82	Acyltransferase	I
balf_cluster_gene_095036_1	78245.Xaut_1087	gnl|BL_ORD_ID|9087562 78245.Xaut_1087	171.4	5.99472e-46	28.7	regulatory prophage protein	S
balf_cluster_gene_231594_1	357348.BURPS1106A_2083	gnl|BL_ORD_ID|14579245 357348.BURPS1106A_2083	159.073	2.42187e-40	47.01
balf_cluster_gene_158343_1	411466.ACTODO_01535	gnl|BL_ORD_ID|1771560 411466.ACTODO_01535	244.202	2.36708e-76	40.96
balf_cluster_gene_010354_1	562971.HMPREF0005_05172	gnl|BL_ORD_ID|13839697 562971.HMPREF0005_05172	696.041	0	98.26
balf_cluster_gene_047390_1	553201.ROTMU0001_1475	gnl|BL_ORD_ID|9778723 553201.ROTMU0001_1475	659.062	0	98.47
balf_cluster_gene_116702_1	411466.ACTODO_01113	gnl|BL_ORD_ID|1771982 411466.ACTODO_01113	573.163	0	88.67	mandelate racemase muconate lactonizing	M
balf_cluster_gene_094560_1	888828.HMPREF9417_0636	gnl|BL_ORD_ID|10730613 888828.HMPREF9417_0636	758.829	0	98.9
balf_cluster_gene_170436_1	979556.MTES_1185	gnl|BL_ORD_ID|6346662 979556.MTES_1185	644.04	0	78.3	Phosphoribosylglycinamide synthetase	F
balf_cluster_gene_095356_1	234621.RER_14650	gnl|BL_ORD_ID|5195580 234621.RER_14650	274.633	1.08424e-87	51.68	Monooxygenase	C
balf_cluster_gene_034978_1	700598.Niako_6849	gnl|BL_ORD_ID|8364268 700598.Niako_6849	455.677	3.12882e-158	57.98	Coproporphyrinogen III oxidase	H
balf_cluster_gene_124927_1	857575.E9S_07800	gnl|BL_ORD_ID|13066330 857575.E9S_07800	807.364	0	99.76
balf_cluster_gene_184403_1	997830.HMPREF1124_1777	gnl|BL_ORD_ID|4484261 997830.HMPREF1124_1777	837.795	0	99.05	Membrane-associated zinc metalloprotease	M
balf_cluster_gene_202045_1	279238.Saro_2645	gnl|BL_ORD_ID|3557500 279238.Saro_2645	547.354	0	74.17	Na( ) H( ) antiporter that extrudes sodium in exchange for external protons (By similarity)	P
balf_cluster_gene_143130_1	866778.HMPREF9684_0585	gnl|BL_ORD_ID|11625156 866778.HMPREF9684_0585	668.307	0	99.69
balf_cluster_gene_196364_1	1033810.HLPCO_14389	gnl|BL_ORD_ID|6827616 1033810.HLPCO_14389	415.616	2.41158e-142	54.09	Specifically methylates the guanine in position 2445 (m2G2445) and the guanine in position 2069 (m7G2069) of 23S rRNA (By similarity)	L
balf_cluster_gene_233235_1	596309.RHOER0001_3645	gnl|BL_ORD_ID|9819704 596309.RHOER0001_3645	785.793	0	99.49
balf_cluster_gene_143099_1	457412.RSAG_03073	gnl|BL_ORD_ID|7874794 457412.RSAG_03073	501.901	3.62909e-176	61.73	Sigma factors are initiation factors that promote the attachment of RNA polymerase to specific initiation sites and are then released (By similarity)	K
balf_cluster_gene_082840_1	632772.ROP_26600	gnl|BL_ORD_ID|5829516 632772.ROP_26600	578.556	0	74.59	l-carnitine dehydratase bile acid-inducible protein F	C
balf_cluster_gene_016672_1	469371.Tbis_1711	gnl|BL_ORD_ID|2098652 469371.Tbis_1711	251.521	2.13021e-79	45.87	Periplasmic binding protein LacI transcriptional regulator	G
balf_cluster_gene_187089_1	658664.HMPREF1004_03123	gnl|BL_ORD_ID|14816071 658664.HMPREF1004_03123	696.812	0	92.41
balf_cluster_gene_060442_1	760570.HMPREF0833_10748	gnl|BL_ORD_ID|13014926 760570.HMPREF0833_10748	850.892	0	98.1
balf_cluster_gene_059709_1	546269.HMPREF0389_01013	gnl|BL_ORD_ID|2435180 546269.HMPREF0389_01013	754.592	0	98.93	(ABC) transporter	S
balf_cluster_gene_114088_1	411466.ACTODO_01703	gnl|BL_ORD_ID|1771828 411466.ACTODO_01703	835.099	0	97.83	phosphohexokinase	G
balf_cluster_gene_207453_1	562971.HMPREF0005_00223	gnl|BL_ORD_ID|13841478 562971.HMPREF0005_00223	693.73	0	99.42
balf_cluster_gene_043467_1	3847.GLYMA12G36106.1	gnl|BL_ORD_ID|3407823 3847.GLYMA12G36106.1	614.379	0	88.66	Produces ATP from ADP in the presence of a proton gradient across the membrane. The alpha chain is a regulatory subunit (By similarity)	C
balf_cluster_gene_020225_1	626369.HMPREF0446_01616	gnl|BL_ORD_ID|6394986 626369.HMPREF0446_01616	664.455	0	82.26	amidohydrolase	E
balf_cluster_gene_219579_1	279238.Saro_2269	gnl|BL_ORD_ID|3555548 279238.Saro_2269	547.74	0	85.41	2-Nitropropane dioxygenase	S
balf_cluster_gene_094177_1	706436.HMPREF9074_01926	gnl|BL_ORD_ID|4304879 706436.HMPREF9074_01926	190.274	1.32906e-52	36.76	repeat-containing protein	S
balf_cluster_gene_223239_1	633149.Bresu_3223	gnl|BL_ORD_ID|7578055 633149.Bresu_3223	650.203	0	91.47	The beta subunit is responsible for the synthesis of L- tryptophan from indole and L-serine (By similarity)	E
balf_cluster_gene_002411_1	311403.Arad_9318	gnl|BL_ORD_ID|8120287 311403.Arad_9318	425.246	1.39498e-145	61.32	Major Facilitator superfamily	G
balf_cluster_gene_021430_1	680646.RMDY18_04420	gnl|BL_ORD_ID|6600983 680646.RMDY18_04420	647.506	0	99.69	Catalyzes, together with MoaC, the conversion of 5'-GTP to cyclic pyranopterin monophosphate (cPMP or molybdopterin precursor Z) (By similarity)	H
balf_cluster_gene_063536_1	649742.HMPREF0970_02016	gnl|BL_ORD_ID|14219915 649742.HMPREF0970_02016	621.698	0	91.87
balf_cluster_gene_173964_1	234267.Acid_2490	gnl|BL_ORD_ID|8520670 234267.Acid_2490	382.489	3.40111e-127	52.02	Beta-lactamase	V
balf_cluster_gene_210653_1	562971.HMPREF0005_03073	gnl|BL_ORD_ID|13840808 562971.HMPREF0005_03073	783.867	0	99.48
balf_cluster_gene_200215_1	340100.Bpet1190	gnl|BL_ORD_ID|4575600 340100.Bpet1190	387.882	7.61609e-133	58.94
balf_cluster_gene_131738_1	639283.Snov_2280	gnl|BL_ORD_ID|6267004 639283.Snov_2280	383.259	4.58405e-131	57.58	extra-cytoplasmic solute receptor family protein	S
balf_cluster_gene_127149_1	525257.HMPREF0204_14488	gnl|BL_ORD_ID|5162957 525257.HMPREF0204_14488	415.616	1.74083e-140	52.94	Together with NAD(P)HX epimerase, which catalyzes the epimerization of the S- and R-forms, the enzyme allows the repair of both epimers of NAD(P)HX, a damaged form of NAD(P)H that is a result of enzymatic or heat-dependent hydration (By similarity)	G
balf_cluster_gene_056643_1	525264.HMPREF0305_11130	gnl|BL_ORD_ID|9493839 525264.HMPREF0305_11130	348.977	3.66829e-116	50.81	Allows the formation of correctly charged Gln-tRNA(Gln) through the transamidation of misacylated Glu-tRNA(Gln) in organisms which lack glutaminyl-tRNA synthetase. The reaction takes place in the presence of glutamine and ATP through an activated gamma-phospho-Glu-tRNA(Gln) (By similarity)	J
balf_cluster_gene_168982_1	888741.HMPREF9098_0635	gnl|BL_ORD_ID|6898740 888741.HMPREF9098_0635	717.998	0	98.11	Membrane	S
balf_cluster_gene_118449_1	649742.HMPREF0970_02284	gnl|BL_ORD_ID|14220974 649742.HMPREF0970_02284	559.296	0	81.4
balf_cluster_gene_209330_1	706436.HMPREF9074_01734	gnl|BL_ORD_ID|4307464 706436.HMPREF9074_01734	698.738	0	98.82	Catalyzes the ferrous insertion into protoporphyrin IX (By similarity)	H
balf_cluster_gene_093544_1	871237.SIN_1503	gnl|BL_ORD_ID|1661605 871237.SIN_1503	689.493	0	97.95	Phosphotransfer between the C1 and C5 carbon atoms of pentose (By similarity)	G
balf_cluster_gene_140031_1	693982.Sinme_1525	gnl|BL_ORD_ID|11757854 693982.Sinme_1525	540.421	0	72.04
balf_cluster_gene_021960_1	709797.CSIRO_1442	gnl|BL_ORD_ID|7182633 709797.CSIRO_1442	689.108	0	81.31	acyl-CoA dehydrogenase	I
balf_cluster_gene_143522_1	543728.Vapar_0300	gnl|BL_ORD_ID|2401881 543728.Vapar_0300	303.138	7.49661e-100	48.19	LysR family (Transcriptional regulator	K
balf_cluster_gene_029044_1	765698.Mesci_3707	gnl|BL_ORD_ID|2840045 765698.Mesci_3707	681.404	0	88.19	Signal Transduction Histidine Kinase	T
balf_cluster_gene_052499_1	627192.SLG_08170	gnl|BL_ORD_ID|324065 627192.SLG_08170	267.7	1.3485e-84	47.01	levansucrase EC 2.4.1.10	G
balf_cluster_gene_024760_1	649742.HMPREF0970_01670	gnl|BL_ORD_ID|14220128 649742.HMPREF0970_01670	532.717	1.74245e-169	63.9
balf_cluster_gene_144733_1	553201.ROTMU0001_0944	gnl|BL_ORD_ID|9779200 553201.ROTMU0001_0944	672.544	0	95.92
balf_cluster_gene_124742_1	888828.HMPREF9417_0112	gnl|BL_ORD_ID|10732151 888828.HMPREF9417_0112	712.22	0	98.29
balf_cluster_gene_230640_1	887898.HMPREF0551_1786	gnl|BL_ORD_ID|8527785 887898.HMPREF0551_1786	644.04	0	100	type ii secretion system protein e	U
balf_cluster_gene_223928_1	449447.MAE_11990	gnl|BL_ORD_ID|7738598 449447.MAE_11990	219.164	1.10189e-66	35.05	NA	S
balf_cluster_gene_181144_1	237727.NAP1_10188	gnl|BL_ORD_ID|7315185 237727.NAP1_10188	270.396	1.29548e-86	44.51	NA	S
balf_cluster_gene_107047_1	742820.HMPREF9459_00456	gnl|BL_ORD_ID|10904969 742820.HMPREF9459_00456	371.318	4.98272e-125	50
balf_cluster_gene_139200_1	562971.HMPREF0005_02768	gnl|BL_ORD_ID|13842738 562971.HMPREF0005_02768	684.485	0	99.7
balf_cluster_gene_138079_1	208596.CAR_c24230	gnl|BL_ORD_ID|2322089 208596.CAR_c24230	538.88	0	64.65	The central subunit of the protein translocation channel SecYEG. Consists of two halves formed by TMs 1-5 and 6-10. These two domains form a lateral gate at the front which open onto the bilayer between TMs 2 and 7, and are clamped together by SecE at the back. The channel is closed by both a pore ring composed of hydrophobic SecY resides and a short helix (helix 2A) on the extracellular side of …	U
balf_cluster_gene_106954_1	441620.Mpop_3288	gnl|BL_ORD_ID|6959104 441620.Mpop_3288	688.337	0	97.19	luxR family transcriptional regulator	K
balf_cluster_gene_012702_1	997348.HMPREF9418_0282	gnl|BL_ORD_ID|10897382 997348.HMPREF9418_0282	763.837	0	96.63
balf_cluster_gene_061001_1	638301.HMPREF0444_0409	gnl|BL_ORD_ID|2635342 638301.HMPREF0444_0409	637.491	0	90.29	The heterodimer acts as both an ATP-dependent DNA helicase and an ATP-dependent, dual-direction single-stranded exonuclease. Recognizes the chi site generating a DNA molecule suitable for the initiation of homologous recombination. The AddA nuclease domain is required for chi fragment generation	L
balf_cluster_gene_210313_1	279238.Saro_0679	gnl|BL_ORD_ID|3555531 279238.Saro_0679	523.472	0	74.51	NADH dehydrogenase ubiquinone complex I, assembly factor 7	S
balf_cluster_gene_005606_1	360104.CCC13826_1751	gnl|BL_ORD_ID|693487 360104.CCC13826_1751	674.47	0	97.94	DNA-dependent RNA polymerase catalyzes the transcription of DNA into RNA using the four ribonucleoside triphosphates as substrates (By similarity)	K
balf_cluster_gene_125491_1	862965.PARA_14850	gnl|BL_ORD_ID|3062668 862965.PARA_14850	753.821	0	97.02	transglutaminase domain-containing protein	E
balf_cluster_gene_120522_1	525263.HMPREF0298_0324	gnl|BL_ORD_ID|3964769 525263.HMPREF0298_0324	459.144	3.38643e-161	68.62	Produces ATP from ADP in the presence of a proton gradient across the membrane. The gamma chain is believed to be important in regulating ATPase activity and the flow of protons through the CF(0) complex (By similarity)	C
balf_cluster_gene_033739_1	266835.mlr5042	gnl|BL_ORD_ID|7529537 266835.mlr5042	726.087	0	88.92	acyl-CoA dehydrogenase	I
balf_cluster_gene_008561_1	997353.HMPREF9144_0542	gnl|BL_ORD_ID|8558943 997353.HMPREF9144_0542	811.601	0	99	protease	M
balf_cluster_gene_054416_1	279238.Saro_0858	gnl|BL_ORD_ID|3554830 279238.Saro_0858	689.108	0	85.56	acyl-CoA dehydrogenase	I
balf_cluster_gene_041376_1	516950.SPCG_0691	gnl|BL_ORD_ID|13963093 516950.SPCG_0691	769.615	0	93.25
balf_cluster_gene_010930_1	596315.HMPREF0634_0876	gnl|BL_ORD_ID|5779519 596315.HMPREF0634_0876	816.994	0	96.59	domain protein	C
balf_cluster_gene_103115_1	525364.HMPREF0545_0011	gnl|BL_ORD_ID|11651326 525364.HMPREF0545_0011	245.743	1.04154e-74	35.29
balf_cluster_gene_007223_1	596329.HMPREF0631_0150	gnl|BL_ORD_ID|6462233 596329.HMPREF0631_0150	543.502	0	67.47	2-hydroxyglutaryl-CoA dehydratase	E
balf_cluster_gene_093182_1	450851.PHZ_c1693	gnl|BL_ORD_ID|7726949 450851.PHZ_c1693	571.237	0	81.92	phosphoribosylaminoimidazole synthetase	F
balf_cluster_gene_107265_1	562971.HMPREF0005_03110	gnl|BL_ORD_ID|13840845 562971.HMPREF0005_03110	767.689	0	99.74
balf_cluster_gene_112064_1	888048.HMPREF8577_1773	gnl|BL_ORD_ID|4164998 888048.HMPREF8577_1773	684.485	0	95.32
balf_cluster_gene_176969_1	76114.ebA6578	gnl|BL_ORD_ID|3938187 76114.ebA6578	397.127	4.75354e-134	53.05	Protein of unknown function N-terminus (DUF3323)	S
balf_cluster_gene_075263_1	765120.HMPREF9618_01881	gnl|BL_ORD_ID|14865959 765120.HMPREF9618_01881	832.787	0	99.76
balf_cluster_gene_104680_1	700598.Niako_6728	gnl|BL_ORD_ID|8358647 700598.Niako_6728	588.186	0	74.86	radical SAM domain protein	L
balf_cluster_gene_190959_1	4577.AC185122.3_FGP008	gnl|BL_ORD_ID|5447914 4577.AC185122.3_FGP008	686.411	0	83.13	Transposase	L
balf_cluster_gene_212666_1	638301.HMPREF0444_1128	gnl|BL_ORD_ID|2635819 638301.HMPREF0444_1128	608.216	0	93.15	Binding-protein-dependent transport systems inner membrane component	P
balf_cluster_gene_101098_1	979556.MTES_2716	gnl|BL_ORD_ID|6345567 979556.MTES_2716	543.502	0	78.09	non-ribosomal peptide synthetase	Q
balf_cluster_gene_018720_1	562981.HMPREF0428_01097	gnl|BL_ORD_ID|931861 562981.HMPREF0428_01097	773.852	0	98.21
balf_cluster_gene_053284_1	662598.NMO_1794	gnl|BL_ORD_ID|9888802 662598.NMO_1794	871.307	0	99.52
balf_cluster_gene_105372_1	944559.HMPREF9413_2407	gnl|BL_ORD_ID|1454571 944559.HMPREF9413_2407	245.743	3.48511e-75	36.27	domain protein	S
balf_cluster_gene_130278_1	596320.NEIFL0001_0528	gnl|BL_ORD_ID|890001 596320.NEIFL0001_0528	713.761	0	94.75	DNA gyrase negatively supercoils closed circular double- stranded DNA in an ATP-dependent manner and also catalyzes the interconversion of other topological isomers of double-stranded DNA rings, including catenanes and knotted rings (By similarity)	L
balf_cluster_gene_201074_1	562971.HMPREF0005_01420	gnl|BL_ORD_ID|13842909 562971.HMPREF0005_01420	811.216	0	99.76
balf_cluster_gene_048787_1	857574.E9U_00375	gnl|BL_ORD_ID|12628885 857574.E9U_00375	291.967	5.55137e-95	46.43
balf_cluster_gene_221938_1	391600.BBAL3_379	gnl|BL_ORD_ID|6629339 391600.BBAL3_379	646.736	0	79.06	Dehydrogenase	C
balf_cluster_gene_135680_1	680646.RMDY18_03390	gnl|BL_ORD_ID|6600491 680646.RMDY18_03390	717.227	0	95.38	Monooxygenase	C
balf_cluster_gene_164658_1	1007104.SUS17_2561	gnl|BL_ORD_ID|1295328 1007104.SUS17_2561	708.753	0	82.69	radical SAM domain protein	S
balf_cluster_gene_089237_1	553201.ROTMU0001_0538	gnl|BL_ORD_ID|9778814 553201.ROTMU0001_0538	624.009	0	95.24
balf_cluster_gene_170851_1	709797.CSIRO_2134	gnl|BL_ORD_ID|7185072 709797.CSIRO_2134	728.013	0	88	4-Hydroxyphenylpyruvate dioxygenase	E
balf_cluster_gene_043505_1	114615.BRADO5662	gnl|BL_ORD_ID|5753114 114615.BRADO5662	669.848	0	90.24	phospho-N-acetylmuramoyl-pentapeptide-transferase activity	M
balf_cluster_gene_091357_1	391626.OA307_1084	gnl|BL_ORD_ID|3780234 391626.OA307_1084	320.857	2.38664e-105	46.52	conserved protein	S
balf_cluster_gene_219026_1	525257.HMPREF0204_12532	gnl|BL_ORD_ID|5163207 525257.HMPREF0204_12532	449.129	4.07824e-156	62.79	dna polymerase iii subunits gamma and tau	L
balf_cluster_gene_064739_1	546273.VEIDISOL_01721	gnl|BL_ORD_ID|4288720 546273.VEIDISOL_01721	763.066	0	99.22	Major Facilitator	G
balf_cluster_gene_067670_1	633149.Bresu_0035	gnl|BL_ORD_ID|7576555 633149.Bresu_0035	681.404	0	93.66	May play a key role in the regulation of the intracellular concentration of adenosylhomocysteine (By similarity)	H
balf_cluster_gene_146422_1	450851.PHZ_c3259	gnl|BL_ORD_ID|7727878 450851.PHZ_c3259	390.578	6.35609e-127	55.76	DNA ligase	L
balf_cluster_gene_052079_1	525260.HMPREF0276_0018	gnl|BL_ORD_ID|2136847 525260.HMPREF0276_0018	865.529	0	99.76	citrate synthase	C
balf_cluster_gene_222800_1	565050.CCNA_02505	gnl|BL_ORD_ID|14114456 565050.CCNA_02505	361.303	1.60624e-122	57.62
balf_cluster_gene_156286_1	196627.cg1999	gnl|BL_ORD_ID|7306237 196627.cg1999	261.922	1.3499e-80	42.78
balf_cluster_gene_136295_1	888048.HMPREF8577_1420	gnl|BL_ORD_ID|4164917 888048.HMPREF8577_1420	809.29	0	99	sugar transferase	M
balf_cluster_gene_135089_1	888828.HMPREF9417_1130	gnl|BL_ORD_ID|10730398 888828.HMPREF9417_1130	681.789	0	99.71
balf_cluster_gene_126598_1	460265.Mnod_6453	gnl|BL_ORD_ID|8900308 460265.Mnod_6453	619.002	0	92.05	Retrotransposon protein	L
balf_cluster_gene_099106_1	1007104.SUS17_2157	gnl|BL_ORD_ID|1294809 1007104.SUS17_2157	569.311	0	73.05	Catalyzes the conversion of D-ribulose 5-phosphate to formate and 3,4-dihydroxy-2-butanone 4-phosphate (By similarity)	H
balf_cluster_gene_042621_1	866776.HMPREF9321_0389	gnl|BL_ORD_ID|1335698 866776.HMPREF9321_0389	766.533	0	98.96	Mate efflux family protein	V
balf_cluster_gene_118161_1	658664.HMPREF1004_00919	gnl|BL_ORD_ID|14817553 658664.HMPREF1004_00919	552.747	0	68.75
balf_cluster_gene_044421_1	997353.HMPREF9144_1753	gnl|BL_ORD_ID|8558296 997353.HMPREF9144_1753	839.721	0	99.75	that it carries out the mismatch recognition step. This protein has a weak ATPase activity (By similarity)	L
balf_cluster_gene_098265_1	428406.Rpic12D_4429	gnl|BL_ORD_ID|13823866 428406.Rpic12D_4429	747.658	0	95.9
balf_cluster_gene_033777_1	224911.bll3916	gnl|BL_ORD_ID|7498282 224911.bll3916	573.933	0	79.3	Transcriptional regulator	K
balf_cluster_gene_209754_1	445334.CPC_0946	gnl|BL_ORD_ID|13817941 445334.CPC_0946	104.76	5.15108e-22	19.28
balf_cluster_gene_205531_1	1030843.PGTDC60_1878	gnl|BL_ORD_ID|14462732 1030843.PGTDC60_1878	416.387	3.99613e-142	60.12
balf_cluster_gene_090204_1	391600.BBAL3_2189	gnl|BL_ORD_ID|6627030 391600.BBAL3_2189	566.614	0	76.67	glucose-6-phosphate isomerase activity	G
balf_cluster_gene_218259_1	247156.nfa27850	gnl|BL_ORD_ID|7375182 247156.nfa27850	398.667	4.18356e-133	54.37	oxidoreductase	E
balf_cluster_gene_225796_1	224911.blr0842	gnl|BL_ORD_ID|7500798 224911.blr0842	605.134	0	77.6	Metal Dependent Phosphohydrolase	T
balf_cluster_gene_111268_1	888052.HMPREF9006_0289	gnl|BL_ORD_ID|8697939 888052.HMPREF9006_0289	533.487	0	82.53	Catalyzes the ATP-dependent phosphorylation of thiamine- monophosphate (TMP) to form thiamine-pyrophosphate (TPP), the active form of vitamin B1 (By similarity)	H
balf_cluster_gene_049289_1	543728.Vapar_3561	gnl|BL_ORD_ID|2396980 543728.Vapar_3561	546.199	0	65.55	Sodium hydrogen exchanger	P
balf_cluster_gene_061047_1	702438.HMPREF9431_00788	gnl|BL_ORD_ID|5117691 702438.HMPREF9431_00788	231.106	8.55995e-70	36.41
balf_cluster_gene_205926_1	1003200.AXXA_05008	gnl|BL_ORD_ID|3459470 1003200.AXXA_05008	441.81	2.02336e-154	78.77	Anti-feci sigma factor, fecr	T
balf_cluster_gene_192274_1	391600.BBAL3_3459	gnl|BL_ORD_ID|6626009 391600.BBAL3_3459	506.523	1.92243e-178	72.24	ppx gppa phosphatase	F:P
balf_cluster_gene_130273_1	649761.HMPREF0973_01926	gnl|BL_ORD_ID|692467 649761.HMPREF0973_01926	600.512	0	72.8
balf_cluster_gene_125031_1	706433.HMPREF9430_01917	gnl|BL_ORD_ID|2353466 706433.HMPREF9430_01917	787.334	0	95.67	Specifically catalyzes the decarboxylation of meso- diaminopimelate (meso-DAP) to L-lysine (By similarity)	E
balf_cluster_gene_179022_1	562981.HMPREF0428_00450	gnl|BL_ORD_ID|931511 562981.HMPREF0428_00450	796.964	0	99.5	Nadh dehydrogenase	C
balf_cluster_gene_085411_1	428406.Rpic12D_3612	gnl|BL_ORD_ID|13823067 428406.Rpic12D_3612	621.698	0	82.37
balf_cluster_gene_080621_1	979556.MTES_0372	gnl|BL_ORD_ID|6344353 979556.MTES_0372	575.474	0	86.06	Transcription elongation factor NusA	K
balf_cluster_gene_117489_1	709797.CSIRO_3265	gnl|BL_ORD_ID|7185173 709797.CSIRO_3265	626.706	0	80.05	dTDP-glucose 4-6-dehydratase	M
balf_cluster_gene_153956_1	762963.HMPREF9056_00781	gnl|BL_ORD_ID|2995789 762963.HMPREF9056_00781	404.445	6.27221e-137	52.32	Membrane	S
balf_cluster_gene_049760_1	685035.CbatJ_010100006566	gnl|BL_ORD_ID|7007518 685035.CbatJ_010100006566	492.656	5.70129e-167	67.02	tonB-dependent Receptor	P
balf_cluster_gene_135209_1	288000.BBta_6401	gnl|BL_ORD_ID|9071187 288000.BBta_6401	488.804	4.32839e-172	71.39	D-fructose-1,6-bisphosphate 1-phosphohydrolase class 1	G
balf_cluster_gene_004572_1	680646.RMDY18_07370	gnl|BL_ORD_ID|6600598 680646.RMDY18_07370	677.552	0	82.99	Exonuclease	L
balf_cluster_gene_076594_1	857581.E9G_02148	gnl|BL_ORD_ID|12139300 857581.E9G_02148	811.216	0	97
balf_cluster_gene_152304_1	675635.Psed_0629	gnl|BL_ORD_ID|9497941 675635.Psed_0629	689.493	0	96.75	methane phenol toluene hydroxylase	Q
balf_cluster_gene_056467_1	471853.Bcav_1496	gnl|BL_ORD_ID|9299378 471853.Bcav_1496	230.335	7.93584e-69	28.01	Restriction modification system DNA (Specificity	V
balf_cluster_gene_182816_1	1112856.MPNA5730	gnl|BL_ORD_ID|11597611 1112856.MPNA5730	750.74	0	99.73
balf_cluster_gene_093717_1	441620.Mpop_1292	gnl|BL_ORD_ID|6958819 441620.Mpop_1292	676.011	0	77.65	Cytochrome p450	Q
balf_cluster_gene_167526_1	565050.CCNA_02961	gnl|BL_ORD_ID|14114912 565050.CCNA_02961	582.793	0	80.68
balf_cluster_gene_171768_1	279238.Saro_0047	gnl|BL_ORD_ID|3557632 279238.Saro_0047	538.88	0	83.23	cation diffusion facilitator family transporter	P
balf_cluster_gene_092187_1	702113.PP1Y_AT4485	gnl|BL_ORD_ID|4885568 702113.PP1Y_AT4485	363.614	1.66583e-122	51.25	protein tyrosine serine phosphatase	T
balf_cluster_gene_119831_1	525246.HMPREF0058_1800	gnl|BL_ORD_ID|9181807 525246.HMPREF0058_1800	458.373	3.04195e-157	67.54	Catalyzes the addition of meso-diaminopimelic acid to the nucleotide precursor UDP-N-acetylmuramoyl-L-alanyl-D-glutamate (UMAG) in the biosynthesis of bacterial cell-wall peptidoglycan (By similarity)	M
balf_cluster_gene_108222_1	441620.Mpop_1743	gnl|BL_ORD_ID|6957459 441620.Mpop_1743	698.353	0	96.28	radical SAM domain protein	L
balf_cluster_gene_154055_1	411466.ACTODO_00089	gnl|BL_ORD_ID|1772186 411466.ACTODO_00089	749.584	0	98.17	permease	F
balf_cluster_gene_233925_1	562971.HMPREF0005_00731	gnl|BL_ORD_ID|13844539 562971.HMPREF0005_00731	703.745	0	98.28
balf_cluster_gene_073129_1	546273.VEIDISOL_01200	gnl|BL_ORD_ID|4289243 546273.VEIDISOL_01200	715.301	0	97.45	glutamine synthetase	E
balf_cluster_gene_203429_1	522373.Smlt4338	gnl|BL_ORD_ID|645271 522373.Smlt4338	564.303	0	64.75	Dehydrogenase	C
balf_cluster_gene_178252_1	469589.HMPREF0103_3471	gnl|BL_ORD_ID|12611770 469589.HMPREF0103_3471	525.398	0	81.25
balf_cluster_gene_001870_1	441620.Mpop_2366	gnl|BL_ORD_ID|6960370 441620.Mpop_2366	665.226	0	99.4	AraC family transcriptional regulator	K
balf_cluster_gene_061970_1	1031711.RSPO_c00663	gnl|BL_ORD_ID|3253304 1031711.RSPO_c00663	789.26	0	95.65	Cell Division Protein	D
balf_cluster_gene_221304_1	1037409.BJ6T_34910	gnl|BL_ORD_ID|8425373 1037409.BJ6T_34910	585.489	0	83.33	extra-cytoplasmic solute receptor family protein	S
balf_cluster_gene_121912_1	394.NGR_c28190	gnl|BL_ORD_ID|7299410 394.NGR_c28190	540.036	0	77.04	extra-cytoplasmic solute receptor family protein	S
balf_cluster_gene_164573_1	450851.PHZ_c3087	gnl|BL_ORD_ID|7726119 450851.PHZ_c3087	562.762	0	85.17	The RuvA-RuvB complex in the presence of ATP renatures cruciform structure in supercoiled DNA with palindromic sequence, indicating that it may promote strand exchange reactions in homologous recombination. RuvAB is a helicase that mediates the Holliday junction migration by localized denaturation and reannealing (By similarity)	L
balf_cluster_gene_013484_1	633149.Bresu_1794	gnl|BL_ORD_ID|7578307 633149.Bresu_1794	649.047	0	96.04	This protein promotes the GTP-dependent binding of aminoacyl-tRNA to the A-site of ribosomes during protein biosynthesis (By similarity)	J
balf_cluster_gene_228614_1	562971.HMPREF0005_04036	gnl|BL_ORD_ID|13840254 562971.HMPREF0005_04036	782.711	0	99.48
balf_cluster_gene_135717_1	888833.HMPREF9421_0239	gnl|BL_ORD_ID|5956489 888833.HMPREF9421_0239	706.057	0	96.28	glutamate--cysteine ligase	H
balf_cluster_gene_189238_1	509190.Cseg_1650	gnl|BL_ORD_ID|8147451 509190.Cseg_1650	691.419	0	87.37	acyl-CoA dehydrogenase	I
balf_cluster_gene_100152_1	161528.ED21_24371	gnl|BL_ORD_ID|8450016 161528.ED21_24371	318.161	1.58941e-105	49.84	Alpha beta hydrolase	S
balf_cluster_gene_006591_1	944560.HMPREF9058_1550	gnl|BL_ORD_ID|6434271 944560.HMPREF9058_1550	550.051	0	85.09	Mannitol dehydrogenase	G
balf_cluster_gene_184358_1	441620.Mpop_3918	gnl|BL_ORD_ID|6961539 441620.Mpop_3918	677.552	0	97.81	Part of the ABC transporter complex ModABC involved in molybdenum import. Responsible for energy coupling to the transport system (By similarity)	P
balf_cluster_gene_069913_1	888832.HMPREF9420_0694	gnl|BL_ORD_ID|2456543 888832.HMPREF9420_0694	820.846	0	99.24	domain protein	C
balf_cluster_gene_136790_1	317655.Sala_1242	gnl|BL_ORD_ID|257328 317655.Sala_1242	509.22	2.89121e-179	67.64	l-carnitine dehydratase bile acid-inducible protein F	C
balf_cluster_gene_021188_1	1046629.Ssal_00729	gnl|BL_ORD_ID|7163104 1046629.Ssal_00729	632.098	0	95.09	choline binding protein	S
balf_cluster_gene_048647_1	709797.CSIRO_2368	gnl|BL_ORD_ID|7185654 709797.CSIRO_2368	786.563	0	91.25	phage DNA Packaging protein	S
balf_cluster_gene_159931_1	862965.PARA_13630	gnl|BL_ORD_ID|3062552 862965.PARA_13630	645.195	0	95.77	Specifically methylates the guanine in position 1207 of 16S rRNA in the 30S particle (By similarity)	J
balf_cluster_gene_059278_1	521095.Apar_1192	gnl|BL_ORD_ID|5491345 521095.Apar_1192	640.573	0	95.11	nucleoside hydrolase	F
balf_cluster_gene_005269_1	680646.RMDY18_13460	gnl|BL_ORD_ID|6600524 680646.RMDY18_13460	567.385	0	72.3	Essential cell division protein. May link together the upstream cell division proteins, which are predominantly cytoplasmic, with the downstream cell division proteins, which are predominantly periplasmic. May control correct divisome assembly (By similarity)	M
balf_cluster_gene_127964_1	562971.HMPREF0005_00047	gnl|BL_ORD_ID|13841302 562971.HMPREF0005_00047	726.472	0	99.72
balf_cluster_gene_103822_1	431947.PGN_0528	gnl|BL_ORD_ID|9396255 431947.PGN_0528	332.413	1.00351e-110	50.44	von Willebrand factor, type A	S
balf_cluster_gene_221365_1	709797.CSIRO_0843	gnl|BL_ORD_ID|7182614 709797.CSIRO_0843	787.719	0	97.45	l-carnitine dehydratase bile acid-inducible protein F	C
balf_cluster_gene_179838_1	525372.HMPREF0765_0992	gnl|BL_ORD_ID|12779660 525372.HMPREF0765_0992	275.018	1.14488e-87	44.57
balf_cluster_gene_219896_1	273068.TTE1663	gnl|BL_ORD_ID|8086467 273068.TTE1663	365.155	3.33845e-122	51.32	cysteine desulfurase	E
balf_cluster_gene_009911_1	441620.Mpop_1119	gnl|BL_ORD_ID|6958470 441620.Mpop_1119	687.182	0	98.36	ABC transporter (permease)	S
balf_cluster_gene_010781_1	765698.Mesci_5060	gnl|BL_ORD_ID|2840093 765698.Mesci_5060	751.125	0	85.45	Phosphoribosylglycinamide synthetase	F
balf_cluster_gene_185183_1	360107.CHAB381_0969	gnl|BL_ORD_ID|9196148 360107.CHAB381_0969	478.019	1.8074e-166	60.71	Phosphopantothenoylcysteine decarboxylase	H
balf_cluster_gene_148653_1	546268.NEISUBOT_03503	gnl|BL_ORD_ID|3025634 546268.NEISUBOT_03503	671.003	0	98.18	Catalyzes the first step in hexosamine metabolism, converting fructose-6P into glucosamine-6P using glutamine as a nitrogen source (By similarity)	M
balf_cluster_gene_019835_1	888048.HMPREF8577_0194	gnl|BL_ORD_ID|4165621 888048.HMPREF8577_0194	767.303	0	97.44	major facilitator Superfamily	G
balf_cluster_gene_188083_1	234621.RER_25610	gnl|BL_ORD_ID|5198245 234621.RER_25610	765.377	0	98.21	Part of the ABC transporter complex PotABCD involved in spermidine putrescine import. Responsible for energy coupling to the transport system (By similarity)	E
balf_cluster_gene_055193_1	888833.HMPREF9421_0959	gnl|BL_ORD_ID|5956179 888833.HMPREF9421_0959	664.455	0	95.71	major facilitator Superfamily	G
balf_cluster_gene_226197_1	1045855.DSC_08080	gnl|BL_ORD_ID|3021518 1045855.DSC_08080	489.574	7.82393e-172	68.96	succinyl-diaminopimelate desuccinylase activity	E
balf_cluster_gene_130275_1	596320.NEIFL0001_1827	gnl|BL_ORD_ID|891170 596320.NEIFL0001_1827	700.664	0	95.63	ErfK ybiS ycfS ynhG family protein	S
balf_cluster_gene_183919_1	452662.SJA_C1-24340	gnl|BL_ORD_ID|6482251 452662.SJA_C1-24340	578.17	0	88.79	Catalyzes the reversible oxidation of malate to oxaloacetate (By similarity)	C
balf_cluster_gene_099928_1	879309.HMPREF9199_1202	gnl|BL_ORD_ID|1836343 879309.HMPREF9199_1202	669.463	0	75.55
balf_cluster_gene_168772_1	366602.Caul_3391	gnl|BL_ORD_ID|5858814 366602.Caul_3391	530.406	0	73.02	NADH flavin oxidoreductase, NADH oxidase	C
balf_cluster_gene_099595_1	335284.Pcryo_0467	gnl|BL_ORD_ID|2022184 335284.Pcryo_0467	697.967	0	81.59	The beta subunit is responsible for the synthesis of L- tryptophan from indole and L-serine (By similarity)	E
balf_cluster_gene_040087_1	633149.Bresu_0572	gnl|BL_ORD_ID|7575532 633149.Bresu_0572	578.17	0	80.84	alpha beta hydrolase fold	I
balf_cluster_gene_076919_1	871237.SIN_0346	gnl|BL_ORD_ID|1661981 871237.SIN_0346	487.649	1.06375e-167	60.15	Anaerobic ribonucleoside-triphosphate reductase	F
balf_cluster_gene_181718_1	709797.CSIRO_4218	gnl|BL_ORD_ID|7185652 709797.CSIRO_4218	673.315	0	79.95	extracellular ligand-binding receptor	E
balf_cluster_gene_169600_1	649742.HMPREF0970_01833	gnl|BL_ORD_ID|14220066 649742.HMPREF0970_01833	736.102	0	86.42
balf_cluster_gene_029662_1	450851.PHZ_c3207	gnl|BL_ORD_ID|7727142 450851.PHZ_c3207	482.641	2.16276e-170	78.95	alcohol dehydrogenase	C
balf_cluster_gene_174188_1	546273.VEIDISOL_00951	gnl|BL_ORD_ID|4289482 546273.VEIDISOL_00951	779.245	0	98.47	phosphoglycerate kinase	G
balf_cluster_gene_175249_1	940615.AciX9_0527	gnl|BL_ORD_ID|5740369 940615.AciX9_0527	134.806	3.56529e-33	23.68	phosphate abc transporter	P
balf_cluster_gene_212857_1	546270.GEMHA0001_0742	gnl|BL_ORD_ID|3353404 546270.GEMHA0001_0742	731.48	0	95.65	(ABC) transporter	G
balf_cluster_gene_111381_1	234621.RER_43240	gnl|BL_ORD_ID|5198460 234621.RER_43240	658.677	0	96.82	Transcriptional regulator	K
balf_cluster_gene_006596_1	700598.Niako_0286	gnl|BL_ORD_ID|8364768 700598.Niako_0286	414.461	2.47232e-141	51.16	conserved protein UCP016719	S
balf_cluster_gene_022106_1	700598.Niako_6408	gnl|BL_ORD_ID|8363768 700598.Niako_6408	454.521	1.86283e-159	67.6	Arabinose 5-phosphate isomerase	M
balf_cluster_gene_143247_1	553219.CAMSH0001_2220	gnl|BL_ORD_ID|7357932 553219.CAMSH0001_2220	800.816	0	95.15	protein binding	S
balf_cluster_gene_167811_1	997353.HMPREF9144_2251	gnl|BL_ORD_ID|8558210 997353.HMPREF9144_2251	699.893	0	98.25	metallophosphoesterase	S
balf_cluster_gene_133222_1	868597.BurJV3_0503	gnl|BL_ORD_ID|14793163 868597.BurJV3_0503	673.315	0	87.5
balf_cluster_gene_227017_1	566552.BIFCAT_00589	gnl|BL_ORD_ID|12132140 566552.BIFCAT_00589	617.461	0	69.1
balf_cluster_gene_039765_1	234621.RER_09050	gnl|BL_ORD_ID|5197175 234621.RER_09050	811.987	0	98.77	MCE family	S
balf_cluster_gene_125809_1	596309.RHOER0001_4028	gnl|BL_ORD_ID|9820989 596309.RHOER0001_4028	694.115	0	98.84
balf_cluster_gene_000497_1	700598.Niako_6851	gnl|BL_ORD_ID|8363769 700598.Niako_6851	167.548	1.47511e-46	31.44	NA	S
balf_cluster_gene_002185_1	114615.BRADO5237	gnl|BL_ORD_ID|5753296 114615.BRADO5237	360.533	5.33835e-121	50.52
balf_cluster_gene_117385_1	888052.HMPREF9006_0006	gnl|BL_ORD_ID|8698765 888052.HMPREF9006_0006	584.719	0	77.75	Thiamine pyrophosphokinase C terminal	S
balf_cluster_gene_019707_1	224911.blr7480	gnl|BL_ORD_ID|7500879 224911.blr7480	546.584	0	84.57	riboflavin biosynthesis protein ribF	H
balf_cluster_gene_070779_1	402626.Rpic_0896	gnl|BL_ORD_ID|5588271 402626.Rpic_0896	778.089	0	94.42	Nicotinate phosphoribosyltransferase	H
balf_cluster_gene_227929_1	279238.Saro_0073	gnl|BL_ORD_ID|3554982 279238.Saro_0073	598.971	0	91.84	delta-aminolevulinic acid dehydratase	H
balf_cluster_gene_158637_1	765698.Mesci_0308	gnl|BL_ORD_ID|2840529 765698.Mesci_0308	722.235	0	90.86	mandelate racemase muconate lactonizing	M
balf_cluster_gene_047307_1	857575.E9S_01814	gnl|BL_ORD_ID|13066587 857575.E9S_01814	834.713	0	99.75
balf_cluster_gene_221591_1	649742.HMPREF0970_01635	gnl|BL_ORD_ID|14221283 649742.HMPREF0970_01635	444.891	2.62697e-155	67.07
balf_cluster_gene_050050_1	596309.RHOER0001_6279	gnl|BL_ORD_ID|9820490 596309.RHOER0001_6279	737.643	0	99.23
balf_cluster_gene_132072_1	242619.PG2150	gnl|BL_ORD_ID|1546728 242619.PG2150	185.267	3.16257e-51	30.56	lysm domain protein	S
balf_cluster_gene_019789_1	441620.Mpop_4179	gnl|BL_ORD_ID|6959386 441620.Mpop_4179	814.298	0	99.76	Efflux transporter rnd family, mfp subunit	V
balf_cluster_gene_175584_1	700598.Niako_6288	gnl|BL_ORD_ID|8359135 700598.Niako_6288	777.319	0	84.98	damaged site, the DNA wraps around one UvrB monomer. DNA wrap is dependent on ATP binding by UvrB and probably causes local melting of the DNA helix, facilitating insertion of UvrB beta-hairpin between the DNA strands. Then UvrB probes one DNA strand for the presence of a lesion. If a lesion is found the UvrA subunits dissociate and the UvrB-DNA preincision complex is formed. This complex is subs…	L
balf_cluster_gene_041906_1	553218.CAMRE0001_1933	gnl|BL_ORD_ID|3463755 553218.CAMRE0001_1933	661.374	0	98.78	carbamoyl-phosphate synthetase ammonia chain	F
balf_cluster_gene_151268_1	5722.A2GMJ4	gnl|BL_ORD_ID|9027712 5722.A2GMJ4	77.411	1.01823e-12	11.39	surface antigen BspA-like	U
balf_cluster_gene_205301_1	553206.CORTU0001_1344	gnl|BL_ORD_ID|12647721 553206.CORTU0001_1344	329.717	5.1944e-109	50.28
balf_cluster_gene_055238_1	531844.FIC_00338	gnl|BL_ORD_ID|4797254 531844.FIC_00338	179.104	1.9259e-50	32.31	Glycosyl transferase (Group 1	M
balf_cluster_gene_092292_1	525373.HMPREF0766_13141	gnl|BL_ORD_ID|1528890 525373.HMPREF0766_13141	416.772	3.91987e-134	50.36	Helicase	L
balf_cluster_gene_135293_1	671076.VMD_37260	gnl|BL_ORD_ID|11500978 671076.VMD_37260	243.047	5.78398e-76	36.36
balf_cluster_gene_071853_1	419610.Mext_1153	gnl|BL_ORD_ID|6186547 419610.Mext_1153	458.759	1.8608e-160	66.57	Transcriptional regulator, ARAC family	K
balf_cluster_gene_011777_1	866778.HMPREF9684_0143	gnl|BL_ORD_ID|11624646 866778.HMPREF9684_0143	687.952	0	99.7
balf_cluster_gene_085793_1	862513.HMPREF0602_1640	gnl|BL_ORD_ID|14820410 862513.HMPREF0602_1640	786.949	0	97.66
balf_cluster_gene_081200_1	1005705.HMPREF9967_0400	gnl|BL_ORD_ID|7526641 1005705.HMPREF9967_0400	724.931	0	97.06	Low-affinity potassium transport system. Interacts with Trk system potassium uptake protein TrkA (By similarity)	P
balf_cluster_gene_106675_1	414684.RC1_2604	gnl|BL_ORD_ID|6665750 414684.RC1_2604	404.831	2.06145e-129	63.92	The heterodimer acts as both an ATP-dependent DNA helicase and an ATP-dependent, dual-direction single-stranded exonuclease. Recognizes the chi site generating a DNA molecule suitable for the initiation of homologous recombination. The AddA nuclease domain is required for chi fragment generation	L
balf_cluster_gene_060241_1	638301.HMPREF0444_0037	gnl|BL_ORD_ID|2636064 638301.HMPREF0444_0037	582.408	0	78.27	Histidine kinase	T
balf_cluster_gene_066876_1	411466.ACTODO_02039	gnl|BL_ORD_ID|1772161 411466.ACTODO_02039	740.725	0	97.68	Conserved protein	S
balf_cluster_gene_098618_1	562971.HMPREF0005_01907	gnl|BL_ORD_ID|13841254 562971.HMPREF0005_01907	664.455	0	92.02
balf_cluster_gene_205391_1	441620.Mpop_1506	gnl|BL_ORD_ID|6962504 441620.Mpop_1506	664.455	0	97.65	Transferase	S
balf_cluster_gene_225120_1	755731.Clo1100_1031	gnl|BL_ORD_ID|7968509 755731.Clo1100_1031	419.083	4.19493e-145	62.76	The RuvA-RuvB complex in the presence of ATP renatures cruciform structure in supercoiled DNA with palindromic sequence, indicating that it may promote strand exchange reactions in homologous recombination. RuvAB is a helicase that mediates the Holliday junction migration by localized denaturation and reannealing (By similarity)	L
balf_cluster_gene_003253_1	866776.HMPREF9321_0943	gnl|BL_ORD_ID|1335895 866776.HMPREF9321_0943	371.318	4.78989e-114	67.84	domain protein	U:W
balf_cluster_gene_135360_1	562981.HMPREF0428_00551	gnl|BL_ORD_ID|931934 562981.HMPREF0428_00551	652.129	0	98.44	Glycosyl transferase, family 2	M
balf_cluster_gene_044977_1	411465.PEPMIC_00867	gnl|BL_ORD_ID|3752056 411465.PEPMIC_00867	788.875	0	99.23	Catalyzes the attachment of glutamate to tRNA(Glu) in a two-step reaction glutamate is first activated by ATP to form Glu-AMP and then transferred to the acceptor end of tRNA(Glu) (By similarity)	J
balf_cluster_gene_153121_1	709797.CSIRO_1128	gnl|BL_ORD_ID|7185968 709797.CSIRO_1128	633.639	0	88.65	Responsible for synthesis of pseudouridine from uracil- 55 in the psi GC loop of transfer RNAs (By similarity)	J
balf_cluster_gene_132119_1	649743.HMPREF0972_01244	gnl|BL_ORD_ID|6172734 649743.HMPREF0972_01244	321.242	2.13609e-107	43.17	regulatoR	T
balf_cluster_gene_053444_1	351348.Maqu_0440	gnl|BL_ORD_ID|5126211 351348.Maqu_0440	711.449	0	82.51	Alkane 1-monooxygenase	I
balf_cluster_gene_053038_1	562982.HMPREF0432_00689	gnl|BL_ORD_ID|6892718 562982.HMPREF0432_00689	669.463	0	97.86	Dehydrogenase	C
balf_cluster_gene_011026_1	706436.HMPREF9074_01737	gnl|BL_ORD_ID|4307467 706436.HMPREF9074_01737	675.626	0	99.39	Protein of unknown function (DUF3078)	S
balf_cluster_gene_219727_1	553201.ROTMU0001_0362	gnl|BL_ORD_ID|9778488 553201.ROTMU0001_0362	707.597	0	87.37
balf_cluster_gene_033818_1	638301.HMPREF0444_0593	gnl|BL_ORD_ID|2636756 638301.HMPREF0444_0593	727.628	0	99.43	Carbohydrate kinase	G
balf_cluster_gene_047300_1	314266.SKA58_02760	gnl|BL_ORD_ID|8817915 314266.SKA58_02760	368.622	6.38699e-124	54.6	Integrase	L
balf_cluster_gene_116937_1	391600.BBAL3_804	gnl|BL_ORD_ID|6629017 391600.BBAL3_804	644.425	0	92.67	Deoxycytidine triphosphate deaminase	F
balf_cluster_gene_188809_1	441620.Mpop_3650	gnl|BL_ORD_ID|6957492 441620.Mpop_3650	721.465	0	94.72	membrAne	S
balf_cluster_gene_132075_1	546273.VEIDISOL_00757	gnl|BL_ORD_ID|4288703 546273.VEIDISOL_00757	815.453	0	98.26	deaminase	F
balf_cluster_gene_033380_1	242619.PG0149	gnl|BL_ORD_ID|1548274 242619.PG0149	142.124	8.19525e-36	33.61
balf_cluster_gene_202519_1	1037409.BJ6T_75180	gnl|BL_ORD_ID|8424069 1037409.BJ6T_75180	621.698	0	82.07	Citrate utilization protein b	S
balf_cluster_gene_193256_1	288000.BBta_2826	gnl|BL_ORD_ID|9070402 288000.BBta_2826	686.026	0	86.19	fumarylacetoacetate (faa) hydrolase	S
balf_cluster_gene_193772_1	690566.Sphch_3991	gnl|BL_ORD_ID|3616993 690566.Sphch_3991	526.168	0	63.66	acyl-CoA dehydrogenase	I
balf_cluster_gene_043373_1	224911.bll5843	gnl|BL_ORD_ID|7497290 224911.bll5843	318.161	2.96091e-99	54.52	Flagellin	S
balf_cluster_gene_206648_1	196164.HMPREF0290_1953	gnl|BL_ORD_ID|8642856 196164.HMPREF0290_1953	417.927	4.23682e-142	49.29	DNA protecting protein DprA	L
balf_cluster_gene_141786_1	596315.HMPREF0634_0472	gnl|BL_ORD_ID|5781075 596315.HMPREF0634_0472	676.011	0	99.69	Catalyzes the formation of the alpha-1,6-glucosidic linkages in glycogen by scission of a 1,4-alpha-linked oligosaccharide from growing alpha-1,4-glucan chains and the subsequent attachment of the oligosaccharide to the alpha-1,6 position (By similarity)	G
balf_cluster_gene_052390_1	384676.PSEEN0410	gnl|BL_ORD_ID|9188180 384676.PSEEN0410	531.561	0	69.13	Catalytic subunit of the tRNA-splicing ligase complex that acts by directly joining spliced tRNA halves to mature-sized tRNAs by incorporating the precursor-derived splice junction phosphate into the mature tRNA as a canonical 3',5'- phosphodiester. May act as a RNA ligase with broad substrate specificity, and may function toward other RNAs (By similarity)	S
balf_cluster_gene_051894_1	768726.HMPREF9178_0787	gnl|BL_ORD_ID|262019 768726.HMPREF9178_0787	505.753	6.12421e-177	59.26	Methicillin resistance protein	V
balf_cluster_gene_055505_1	360104.CCC13826_0087	gnl|BL_ORD_ID|693742 360104.CCC13826_0087	683.33	0	98.27	3-dehydroquinate synthase	E
balf_cluster_gene_184105_1	521000.PROVRETT_09170	gnl|BL_ORD_ID|7583612 521000.PROVRETT_09170	438.343	1.43051e-150	64.83	PIWI domain protein	S
balf_cluster_gene_232461_1	888833.HMPREF9961_1287	gnl|BL_ORD_ID|5956341 888833.HMPREF9961_1287	768.844	0	98.92	Nadph-dependent fmn reductase	S
balf_cluster_gene_005000_1	706436.HMPREF9074_05427	gnl|BL_ORD_ID|4307014 706436.HMPREF9074_05427	340.887	7.25137e-112	53.27	conserved repeat domain protein	S
balf_cluster_gene_015994_1	585501.HMPREF6123_1404	gnl|BL_ORD_ID|6007713 585501.HMPREF6123_1404	685.641	0	99.11	DNA gyrase negatively supercoils closed circular double- stranded DNA in an ATP-dependent manner and also catalyzes the interconversion of other topological isomers of double-stranded DNA rings, including catenanes and knotted rings (By similarity)	L
balf_cluster_gene_004533_1	546273.VEIDISOL_01901	gnl|BL_ORD_ID|4288751 546273.VEIDISOL_01901	834.713	0	98.04	Cleaves the N-terminal amino acid of tripeptides (By similarity)	E
balf_cluster_gene_088561_1	706436.HMPREF9074_02244	gnl|BL_ORD_ID|4306165 706436.HMPREF9074_02244	668.692	0	97.67	Na H antiporter	C
balf_cluster_gene_077014_1	402626.Rpic_0720	gnl|BL_ORD_ID|5591749 402626.Rpic_0720	771.155	0	87.71	cytochrome c	C
balf_cluster_gene_095635_1	391600.BBAL3_754	gnl|BL_ORD_ID|6628531 391600.BBAL3_754	515.768	2.33369e-176	69.23	Receptor	P
balf_cluster_gene_160123_1	700598.Niako_0334	gnl|BL_ORD_ID|8364409 700598.Niako_0334	531.176	0	75.63	magnesium ion transmembrane transporter activity	P
balf_cluster_gene_189903_1	649742.HMPREF0970_01728	gnl|BL_ORD_ID|14220121 649742.HMPREF0970_01728	686.026	0	98.83
balf_cluster_gene_221080_1	1007104.SUS17_1079	gnl|BL_ORD_ID|1295170 1007104.SUS17_1079	480.715	3.08976e-169	70.96	Catalyzes, together with MoaC, the conversion of 5'-GTP to cyclic pyranopterin monophosphate (cPMP or molybdopterin precursor Z) (By similarity)	H
balf_cluster_gene_183924_1	1007104.SUS17_1144	gnl|BL_ORD_ID|1296387 1007104.SUS17_1144	366.696	1.23807e-124	66.87	DNA polymerase III subunit delta'	L
balf_cluster_gene_132599_1	562971.HMPREF0005_00176	gnl|BL_ORD_ID|13841431 562971.HMPREF0005_00176	662.914	0	99.42
balf_cluster_gene_175020_1	888828.HMPREF9417_1029	gnl|BL_ORD_ID|10730297 888828.HMPREF9417_1029	830.476	0	97.57
balf_cluster_gene_217048_1	627192.SLG_07440	gnl|BL_ORD_ID|321250 627192.SLG_07440	275.404	2.06896e-86	38.17
balf_cluster_gene_180715_1	658664.HMPREF1004_04374	gnl|BL_ORD_ID|14815471 658664.HMPREF1004_04374	766.148	0	97.44
balf_cluster_gene_044196_1	562971.HMPREF0005_04999	gnl|BL_ORD_ID|13839580 562971.HMPREF0005_04999	781.171	0	99
balf_cluster_gene_100719_1	521095.Apar_1324	gnl|BL_ORD_ID|5490853 521095.Apar_1324	776.163	0	95.42	Histidine kinase	T
balf_cluster_gene_116552_1	649754.HMPREF0281_02160	gnl|BL_ORD_ID|3232326 649754.HMPREF0281_02160	459.144	4.94655e-160	64.99	cell wall formation (By similarity)	M
balf_cluster_gene_137069_1	585503.HMPREF7545_1680	gnl|BL_ORD_ID|8769556 585503.HMPREF7545_1680	210.69	3.74703e-62	34.25	Bidirectionally degrades single-stranded DNA into large acid-insoluble oligonucleotides, which are then degraded further into small acid-soluble oligonucleotides (By similarity)	L
balf_cluster_gene_037738_1	1007104.SUS17_106	gnl|BL_ORD_ID|1294894 1007104.SUS17_106	440.269	7.77006e-154	68.73	Aminodeoxychorismate lyase	S
balf_cluster_gene_001746_1	879309.HMPREF9199_1774	gnl|BL_ORD_ID|1836898 879309.HMPREF9199_1774	808.52	0	98.31	sodium dicarboxylate symporter	S
balf_cluster_gene_035613_1	391600.BBAL3_782	gnl|BL_ORD_ID|6627766 391600.BBAL3_782	567	0	86.07	aspartate transcarbamylase	F
balf_cluster_gene_066083_1	546263.NEIELOOT_00838	gnl|BL_ORD_ID|5509421 546263.NEIELOOT_00838	811.987	0	96.85	Multicopper oxidase	Q
balf_cluster_gene_094952_1	562983.HMPREF0433_00321	gnl|BL_ORD_ID|8445535 562983.HMPREF0433_00321	798.89	0	99.49	Aminotransferase	E
balf_cluster_gene_200807_1	1035189.HMPREF9954_1591	gnl|BL_ORD_ID|6271164 1035189.HMPREF9954_1591	558.525	0	76.7	choline binding protein	S
balf_cluster_gene_230517_1	680646.RMDY18_09400	gnl|BL_ORD_ID|6601099 680646.RMDY18_09400	690.263	0	87
balf_cluster_gene_199244_1	546274.EIKCOROL_00762	gnl|BL_ORD_ID|1138778 546274.EIKCOROL_00762	703.36	0	97.72	DNA polymerase	L
balf_cluster_gene_158779_1	649754.HMPREF0281_02564	gnl|BL_ORD_ID|3232750 649754.HMPREF0281_02564	457.218	1.00245e-159	69.28	bile acid	S
balf_cluster_gene_076719_1	649742.HMPREF0970_00102	gnl|BL_ORD_ID|14220840 649742.HMPREF0970_00102	681.019	0	90.96
balf_cluster_gene_123211_1	655815.ZPR_3465	gnl|BL_ORD_ID|3092795 655815.ZPR_3465	197.208	1.63025e-56	36.29	Conjugative transposon TraM protein	S
balf_cluster_gene_008187_1	314266.SKA58_10265	gnl|BL_ORD_ID|8817741 314266.SKA58_10265	592.808	0	68.1	Cytochrome p450	Q
balf_cluster_gene_108117_1	888828.HMPREF9417_0490	gnl|BL_ORD_ID|10732038 888828.HMPREF9417_0490	671.389	0	99.69
balf_cluster_gene_020685_1	562971.HMPREF0005_02038	gnl|BL_ORD_ID|13844001 562971.HMPREF0005_02038	763.451	0	95.48
balf_cluster_gene_162021_1	435832.HMPREF0604_01634	gnl|BL_ORD_ID|8433232 435832.HMPREF0604_01634	746.117	0	98.64	5-enolpyruvylshikimate-3-phosphate phospholyase	E
balf_cluster_gene_073971_1	203275.BFO_0156	gnl|BL_ORD_ID|9405764 203275.BFO_0156	721.465	0	83.01	Efflux transporter rnd family, mfp subunit	M
balf_cluster_gene_090070_1	279238.Saro_2932	gnl|BL_ORD_ID|3556411 279238.Saro_2932	671.389	0	87.99	amidohydrolase	E
balf_cluster_gene_201236_1	706433.HMPREF9430_01537	gnl|BL_ORD_ID|2354568 706433.HMPREF9430_01537	769.615	0	94.65	Glycerate kinase	G
balf_cluster_gene_195062_1	596309.RHOER0001_3684	gnl|BL_ORD_ID|9822925 596309.RHOER0001_3684	653.67	0	99.17
balf_cluster_gene_074144_1	649742.HMPREF0970_01695	gnl|BL_ORD_ID|14221228 649742.HMPREF0970_01695	530.406	0	72.66
balf_cluster_gene_045914_1	82789.AGRO_2121	gnl|BL_ORD_ID|12268292 82789.AGRO_2121	442.195	2.79095e-152	68.73
balf_cluster_gene_006023_1	751586.BDIM_00350	gnl|BL_ORD_ID|2556944 751586.BDIM_00350	596.66	0	73.52	oxidoreductase activity, acting on the CH-NH2 group of donors, NAD or NADP as acceptor	E
balf_cluster_gene_151393_1	680646.RMDY18_18050	gnl|BL_ORD_ID|6599683 680646.RMDY18_18050	830.091	0	98.33	drug resistance transporter emrb qaca subfamily	P
balf_cluster_gene_126924_1	1003200.AXXA_24590	gnl|BL_ORD_ID|3459422 1003200.AXXA_24590	611.683	0	81.17	PepSY-associated TM helix	S
balf_cluster_gene_044222_1	366394.Smed_1974	gnl|BL_ORD_ID|6201034 366394.Smed_1974	273.092	8.93179e-85	38.07	Transcriptional regulator, gntR family	K
balf_cluster_gene_207732_1	857574.E9U_02141	gnl|BL_ORD_ID|12628402 857574.E9U_02141	646.736	0	96.97
balf_cluster_gene_086075_1	360104.CCC13826_1523	gnl|BL_ORD_ID|694391 360104.CCC13826_1523	803.512	0	98.51
balf_cluster_gene_156373_1	546266.NEIMUCOT_03990	gnl|BL_ORD_ID|2483013 546266.NEIMUCOT_03990	327.405	4.4515e-109	50	Phage protein gp20	S
balf_cluster_gene_007635_1	706433.HMPREF9430_00812	gnl|BL_ORD_ID|2353841 706433.HMPREF9430_00812	754.592	0	88.67	phosphoenolpyruvate carboxylase activity	C
balf_cluster_gene_040981_1	709797.CSIRO_3420	gnl|BL_ORD_ID|7183060 709797.CSIRO_3420	572.392	0	84.97	Dehydrogenase	G
balf_cluster_gene_156846_1	658664.HMPREF1004_00261	gnl|BL_ORD_ID|14819951 658664.HMPREF1004_00261	737.258	0	90.72
balf_cluster_gene_200362_1	709797.CSIRO_2538	gnl|BL_ORD_ID|7184280 709797.CSIRO_2538	618.231	0	85.4	Enoyl-CoA hydratase	I
balf_cluster_gene_066088_1	1037409.BJ6T_54210	gnl|BL_ORD_ID|8419527 1037409.BJ6T_54210	582.022	0	81.2	With EpmB is involved in the beta-lysylation step of the post-translational modification of translation elongation factor P (EF-P). Catalyzes the ATP-dependent activation of (R)-beta-lysine produced by EpmB, forming a lysyl-adenylate, from which the beta- lysyl moiety is then transferred to the epsilon-amino group of a conserved specific lysine residue in EF-P (By similarity)	J
balf_cluster_gene_208888_1	553219.CAMSH0001_1893	gnl|BL_ORD_ID|7357858 553219.CAMSH0001_1893	835.869	0	98.76	aminotransferase	E
balf_cluster_gene_133031_1	1007104.SUS17_2138	gnl|BL_ORD_ID|1296404 1007104.SUS17_2138	810.831	0	94.51	Facilitates transcription termination by a mechanism that involves Rho binding to the nascent RNA, activation of Rho's RNA-dependent ATPase activity, and release of the mRNA from the DNA template (By similarity)	K
balf_cluster_gene_049454_1	562971.HMPREF0005_02077	gnl|BL_ORD_ID|13844040 562971.HMPREF0005_02077	742.265	0	99.73
balf_cluster_gene_208005_1	680646.RMDY18_19250	gnl|BL_ORD_ID|6600575 680646.RMDY18_19250	268.855	6.86019e-78	46.7	YD repeat protein	M
balf_cluster_gene_126775_1	596309.RHOER0001_4076	gnl|BL_ORD_ID|9821035 596309.RHOER0001_4076	664.07	0	98.8
balf_cluster_gene_000401_1	376686.Fjoh_4733	gnl|BL_ORD_ID|5072904 376686.Fjoh_4733	98.2117	3.85726e-19	25	NA	S
balf_cluster_gene_218814_1	1037409.BJ6T_74260	gnl|BL_ORD_ID|8418326 1037409.BJ6T_74260	490.345	3.58342e-171	55.33
balf_cluster_gene_136292_1	592031.GCWU000322_00013	gnl|BL_ORD_ID|4824772 592031.GCWU000322_00013	541.576	0	70.95	Peptide chain release factor 1 directs the termination of translation in response to the peptide chain termination codons UAG and UAA (By similarity)	J
balf_cluster_gene_234045_1	649742.HMPREF0970_01023	gnl|BL_ORD_ID|14221530 649742.HMPREF0970_01023	654.825	0	79.95
balf_cluster_gene_173338_1	1037409.BJ6T_53570	gnl|BL_ORD_ID|8424263 1037409.BJ6T_53570	651.358	0	91.79	Trap dicarboxylate transporter, dctp subunit	G
balf_cluster_gene_148945_1	266835.mlr3046	gnl|BL_ORD_ID|7531019 266835.mlr3046	560.066	0	79.35	Oxidoreductase domain protein	S
balf_cluster_gene_169071_1	314266.SKA58_03470	gnl|BL_ORD_ID|8819629 314266.SKA58_03470	481.485	8.6145e-167	57.72	beta-hydroxylase	O
balf_cluster_gene_034317_1	234621.RER_07610	gnl|BL_ORD_ID|5194787 234621.RER_07610	815.839	0	98.28	threonine-tRNA ligase activity	J
balf_cluster_gene_177025_1	862512.HMPREF0277_1031	gnl|BL_ORD_ID|10364991 862512.HMPREF0277_1031	724.931	0	98.9
balf_cluster_gene_000792_1	441620.Mpop_3685	gnl|BL_ORD_ID|6961607 441620.Mpop_3685	790.03	0	98.75	Efflux transporter rnd family, mfp subunit	V
balf_cluster_gene_140735_1	685035.CbatJ_010100007996	gnl|BL_ORD_ID|7008148 685035.CbatJ_010100007996	234.187	2.27562e-72	44.44	Imidazole acetol-phosphate transaminase	E
balf_cluster_gene_208344_1	522373.Smlt0008	gnl|BL_ORD_ID|645132 522373.Smlt0008	414.461	3.86659e-141	56.65	domain protein	S
balf_cluster_gene_071644_1	411466.ACTODO_00378	gnl|BL_ORD_ID|1771270 411466.ACTODO_00378	775.393	0	91.73	major facilitator Superfamily	G
balf_cluster_gene_016017_1	517722.CJLT1_010100006983	gnl|BL_ORD_ID|8551486 517722.CJLT1_010100006983	204.527	3.08971e-60	36.51	Glycosyl transferases group 1	M
balf_cluster_gene_073574_1	335284.Pcryo_1460	gnl|BL_ORD_ID|2020367 335284.Pcryo_1460	401.364	5.9373e-137	52.01	Catalyzes the interconversion of L-alanine and D- alanine. May also act on other amino acids (By similarity)	M
balf_cluster_gene_048772_1	857575.E9S_00600	gnl|BL_ORD_ID|13066490 857575.E9S_00600	807.364	0	99.75
balf_cluster_gene_128583_1	888057.HMPREF9064_1630	gnl|BL_ORD_ID|7453542 888057.HMPREF9064_1630	783.867	0	99.2	Adenylate cyclase	F
balf_cluster_gene_194939_1	349102.Rsph17025_2424	gnl|BL_ORD_ID|2024368 349102.Rsph17025_2424	140.198	2.17845e-34	28.36	hydrolase family 16	G
balf_cluster_gene_116948_1	504832.OCAR_7700	gnl|BL_ORD_ID|7088335 504832.OCAR_7700	627.861	0	85.41	type IV secretion system protein	U
balf_cluster_gene_163789_1	279238.Saro_1682	gnl|BL_ORD_ID|3557068 279238.Saro_1682	595.504	0	87.7	alanine dehydrogenase	E
balf_cluster_gene_196389_1	224911.blr4086	gnl|BL_ORD_ID|7497968 224911.blr4086	684.871	0	83.14	Aminodeoxychorismate lyase	S
balf_cluster_gene_174383_1	658664.HMPREF1004_01940	gnl|BL_ORD_ID|14819395 658664.HMPREF1004_01940	649.818	0	89.79
balf_cluster_gene_044098_1	706436.HMPREF9074_05629	gnl|BL_ORD_ID|4306226 706436.HMPREF9074_05629	674.085	0	99.4	delta-aminolevulinic acid dehydratase	H
balf_cluster_gene_148295_1	866778.HMPREF9684_1016	gnl|BL_ORD_ID|11625367 866778.HMPREF9684_1016	790.801	0	100
balf_cluster_gene_067680_1	360104.CCC13826_0405	gnl|BL_ORD_ID|693504 360104.CCC13826_0405	726.857	0	95.12	alanine racemase domain protein	E
balf_cluster_gene_123098_1	563038.HMPREF0851_01560	gnl|BL_ORD_ID|6313569 563038.HMPREF0851_01560	775.393	0	97.76	Involved in the import of serine and threonine into the cell, with the concomitant import of sodium (symport system) (By similarity)	E
balf_cluster_gene_000903_1	649742.HMPREF0970_01846	gnl|BL_ORD_ID|14220078 649742.HMPREF0970_01846	509.99	2.14074e-178	72.59
balf_cluster_gene_225154_1	441620.Mpop_1816	gnl|BL_ORD_ID|6960379 441620.Mpop_1816	762.681	0	97.44	domain protein	S
balf_cluster_gene_061531_1	709797.CSIRO_2251	gnl|BL_ORD_ID|7183164 709797.CSIRO_2251	743.036	0	94.24	(ABC) transporter	E
balf_cluster_gene_177384_1	562971.HMPREF0005_05019	gnl|BL_ORD_ID|13839212 562971.HMPREF0005_05019	665.611	0	99.1
balf_cluster_gene_199083_1	391600.BBAL3_142	gnl|BL_ORD_ID|6626110 391600.BBAL3_142	671.389	0	90.77	Mg chelatase subunit ChlI	O
balf_cluster_gene_006876_1	930171.Asphe3_29990	gnl|BL_ORD_ID|639423 930171.Asphe3_29990	290.812	1.36571e-92	40.82	domain protein	S
balf_cluster_gene_234697_1	652103.Rpdx1_3912	gnl|BL_ORD_ID|4458205 652103.Rpdx1_3912	647.506	0	85.83	l-carnitine dehydratase bile acid-inducible protein F	C
balf_cluster_gene_115977_1	258594.RPA0045	gnl|BL_ORD_ID|1490516 258594.RPA0045	459.144	3.50355e-161	71.21	epimerase dehydratase	G:M
balf_cluster_gene_084761_1	441620.Mpop_2094	gnl|BL_ORD_ID|6958477 441620.Mpop_2094	567.385	0	86.23	Histidine kinase	T
balf_cluster_gene_011310_1	562971.HMPREF0005_00842	gnl|BL_ORD_ID|13844650 562971.HMPREF0005_00842	687.182	0	99.44
balf_cluster_gene_221887_1	658664.HMPREF1004_03058	gnl|BL_ORD_ID|14816007 658664.HMPREF1004_03058	661.374	0	95.22
balf_cluster_gene_076626_1	411466.ACTODO_00389	gnl|BL_ORD_ID|1771536 411466.ACTODO_00389	657.522	0	92.6	lysyl-trna synthetase	J
balf_cluster_gene_105954_1	547045.NEISICOT_02304	gnl|BL_ORD_ID|6155832 547045.NEISICOT_02304	826.239	0	96.47	subunit g	C
balf_cluster_gene_203613_1	562971.HMPREF0005_00315	gnl|BL_ORD_ID|13841570 562971.HMPREF0005_00315	860.907	0	99.53
balf_cluster_gene_042453_1	888052.HMPREF9006_1902	gnl|BL_ORD_ID|8697450 888052.HMPREF9006_1902	507.679	3.53459e-180	77.3	Membrane	S
balf_cluster_gene_024536_1	441620.Mpop_2257	gnl|BL_ORD_ID|6958811 441620.Mpop_2257	726.472	0	91.23	dihydrolipoyl dehydrogenase	C
balf_cluster_gene_186253_1	1007104.SUS17_409	gnl|BL_ORD_ID|1296164 1007104.SUS17_409	420.624	3.12561e-145	56.73	phosphate abc transporter	P
balf_cluster_gene_019949_1	709797.CSIRO_2688	gnl|BL_ORD_ID|7183453 709797.CSIRO_2688	560.836	0	76.34	phospholipase carboxylesterase	S
balf_cluster_gene_207902_1	525257.HMPREF0204_13433	gnl|BL_ORD_ID|5158259 525257.HMPREF0204_13433	437.187	8.61948e-151	57.18	Histidine kinase	T
balf_cluster_gene_191403_1	706433.HMPREF9430_01836	gnl|BL_ORD_ID|2353644 706433.HMPREF9430_01836	662.529	0	97.2	alpha amylase, catalytic	G
balf_cluster_gene_014686_1	709797.CSIRO_2626	gnl|BL_ORD_ID|7182969 709797.CSIRO_2626	555.058	0	81.55	Catalyzes the NAD(P)-dependent oxidation of 4- (phosphohydroxy)-L-threonine (HTP) into 2-amino-3-oxo-4- (phosphohydroxy)butyric acid which spontaneously decarboxylates to form 3-amino-2-oxopropyl phosphate (AHAP) (By similarity)	H
balf_cluster_gene_145489_1	411466.ACTODO_01874	gnl|BL_ORD_ID|1771834 411466.ACTODO_01874	708.368	0	92.93	cell wall formation (By similarity)	M
balf_cluster_gene_222570_1	562971.HMPREF0005_02316	gnl|BL_ORD_ID|13844396 562971.HMPREF0005_02316	789.26	0	99.75
balf_cluster_gene_113946_1	376686.Fjoh_0660	gnl|BL_ORD_ID|5073663 376686.Fjoh_0660	175.252	3.56904e-46	33.15	NA	S
balf_cluster_gene_043950_1	502025.Hoch_3938	gnl|BL_ORD_ID|8487503 502025.Hoch_3938	598.586	0	78.87	monooxygenase	S
balf_cluster_gene_038441_1	869215.SPNOXC_06710	gnl|BL_ORD_ID|14713923 869215.SPNOXC_06710	763.451	0	94.9
balf_cluster_gene_106313_1	709797.CSIRO_3257	gnl|BL_ORD_ID|7186081 709797.CSIRO_3257	718.383	0	93.94	GDP-mannose 4,6-dehydratase	M
balf_cluster_gene_082684_1	690566.Sphch_2874	gnl|BL_ORD_ID|3614524 690566.Sphch_2874	338.576	3.68691e-112	40.24	NA	S
balf_cluster_gene_013773_1	428406.Rpic12D_0026	gnl|BL_ORD_ID|13819533 428406.Rpic12D_0026	595.119	0	88.57
balf_cluster_gene_012008_1	435832.HMPREF0604_01528	gnl|BL_ORD_ID|8432597 435832.HMPREF0604_01528	594.349	0	72.95	domain protein	U:W
balf_cluster_gene_046053_1	997353.HMPREF9144_1660	gnl|BL_ORD_ID|8556797 997353.HMPREF9144_1660	841.262	0	99.51
balf_cluster_gene_146388_1	266835.mlr3714	gnl|BL_ORD_ID|7529860 266835.mlr3714	610.912	0	72.18	ROK family	G
balf_cluster_gene_063949_1	680646.RMDY18_12280	gnl|BL_ORD_ID|6601013 680646.RMDY18_12280	432.18	2.76136e-148	51.53
balf_cluster_gene_065819_1	596320.NEIFL0001_2388	gnl|BL_ORD_ID|890088 596320.NEIFL0001_2388	683.33	0	98.55	transporter	E
balf_cluster_gene_005891_1	562981.HMPREF0428_00538	gnl|BL_ORD_ID|932480 562981.HMPREF0428_00538	721.85	0	98.89	Involved in mRNA degradation. Hydrolyzes single-stranded polyribonucleotides processively in the 3'- to 5'-direction (By similarity)	J
balf_cluster_gene_181507_1	5722.A2DVL8	gnl|BL_ORD_ID|9015863 5722.A2DVL8	206.068	5.03281e-58	30.77	NA	S
balf_cluster_gene_155993_1	411466.ACTODO_00388	gnl|BL_ORD_ID|1772664 411466.ACTODO_00388	627.476	0	92.51	Transcriptional regulator	K
balf_cluster_gene_063426_1	1007104.SUS17_714	gnl|BL_ORD_ID|1296199 1007104.SUS17_714	635.95	0	91.04	ATPase activity	S
balf_cluster_gene_223860_1	596309.RHOER0001_2589	gnl|BL_ORD_ID|9821498 596309.RHOER0001_2589	788.104	0	98.78
balf_cluster_gene_108815_1	680646.RMDY18_06690	gnl|BL_ORD_ID|6599442 680646.RMDY18_06690	773.852	0	96.13	Lipoprotein lpqB	S
balf_cluster_gene_191841_1	889204.HMPREF9423_0750	gnl|BL_ORD_ID|11221231 889204.HMPREF9423_0750	763.066	0	96.1
balf_cluster_gene_196100_1	435832.HMPREF0604_01266	gnl|BL_ORD_ID|8433929 435832.HMPREF0604_01266	708.368	0	99.43	polysaccharide export	M
balf_cluster_gene_157934_1	864570.HMPREF9189_0768	gnl|BL_ORD_ID|7996299 864570.HMPREF9189_0768	670.233	0	94.97	NA	S
balf_cluster_gene_205078_1	553220.CAMGR0001_1962	gnl|BL_ORD_ID|4663254 553220.CAMGR0001_1962	583.948	0	71.54	receptor	P
balf_cluster_gene_025120_1	288000.BBta_7539	gnl|BL_ORD_ID|9069162 288000.BBta_7539	589.341	0	72.91	ABC transporter substrate-binding protein	E
balf_cluster_gene_139781_1	553201.ROTMU0001_0649	gnl|BL_ORD_ID|9778914 553201.ROTMU0001_0649	559.296	0	80.93
balf_cluster_gene_115401_1	765698.Mesci_2165	gnl|BL_ORD_ID|2844599 765698.Mesci_2165	726.087	0	92.19	peptidase M24	E
balf_cluster_gene_134777_1	857575.E9S_04277	gnl|BL_ORD_ID|13066708 857575.E9S_04277	483.026	2.11819e-168	63.22
balf_cluster_gene_084285_1	1054460.SPPN_10915	gnl|BL_ORD_ID|7042334 1054460.SPPN_10915	833.173	0	99.52	Toxic anion resistance	P
balf_cluster_gene_199872_1	888828.HMPREF9417_1526	gnl|BL_ORD_ID|10731411 888828.HMPREF9417_1526	666.766	0	98.49
balf_cluster_gene_029866_1	661410.METDI4445	gnl|BL_ORD_ID|11638445 661410.METDI4445	690.263	0	94.59
balf_cluster_gene_151374_1	649742.HMPREF0970_00586	gnl|BL_ORD_ID|14221981 649742.HMPREF0970_00586	435.261	1.7447e-151	64.37
balf_cluster_gene_058748_1	313606.M23134_01996	gnl|BL_ORD_ID|2308839 313606.M23134_01996	402.905	1.16872e-136	51.62	Major Facilitator superfamily	G
balf_cluster_gene_048262_1	633149.Bresu_1663	gnl|BL_ORD_ID|7577918 633149.Bresu_1663	583.948	0	80.65	copper resistance	P
balf_cluster_gene_104600_1	546264.NEIFLAOT_00602	gnl|BL_ORD_ID|4570789 546264.NEIFLAOT_00602	717.227	0	98.58	Poorly processive error-prone DNA polymerase involved in untargeted mutagenesis. Copies undamaged DNA at stalled replication forks which arise in vivo from mismatched or misaligned primer ends. These misaligned primers can be extended by polIV. Exhibits no 3-5 exonuclease (proofreading) activity. May be involved in translesional synthesis in conjunction with the beta clamp from polIII (By similar…	L
balf_cluster_gene_218225_1	1111068.GTCCBUS3UF5_70	gnl|BL_ORD_ID|13716777 1111068.GTCCBUS3UF5_70	417.542	1.32678e-137	55.99
balf_cluster_gene_160574_1	234621.RER_17080	gnl|BL_ORD_ID|5196937 234621.RER_17080	826.239	0	98.81	geranylgeranyl reductase	C
balf_cluster_gene_149718_1	596309.RHOER0001_5985	gnl|BL_ORD_ID|9820757 596309.RHOER0001_5985	721.465	0	94.61
balf_cluster_gene_118920_1	234621.RER_14550	gnl|BL_ORD_ID|5196319 234621.RER_14550	652.899	0	98.77	ABC transporter substrate-binding protein	E
balf_cluster_gene_058838_1	546268.NEISUBOT_04040	gnl|BL_ORD_ID|3025105 546268.NEISUBOT_04040	796.193	0	96.98	Phosphopantothenoylcysteine decarboxylase	H
balf_cluster_gene_123518_1	706433.HMPREF9430_02049	gnl|BL_ORD_ID|2353735 706433.HMPREF9430_02049	831.247	0	93.44	peptidase U62 modulator of DNA gyrase	S
balf_cluster_gene_025738_1	649742.HMPREF0970_00869	gnl|BL_ORD_ID|14221701 649742.HMPREF0970_00869	653.284	0	98.8
balf_cluster_gene_157322_1	655811.HMPREF0078_1531	gnl|BL_ORD_ID|7961794 655811.HMPREF0078_1531	290.426	1.64037e-88	47.55	fmN-binding domain protein	S
balf_cluster_gene_152410_1	546273.VEIDISOL_01575	gnl|BL_ORD_ID|4289445 546273.VEIDISOL_01575	833.558	0	98.79	Catalyzes the transfer of the 2-phospholactate moiety from lactyl (2) diphospho-(5')guanosine (LPPG) to 7,8-didemethyl- 8-hydroxy-5-deazariboflavin (FO) with the formation of the L- lactyl phosphodiester of 7,8-didemethyl-8-hydroxy-5- deazariboflavin (F420-0) and GMP (By similarity)	S
balf_cluster_gene_175555_1	883062.BBIF_0731	gnl|BL_ORD_ID|14441877 883062.BBIF_0731	150.214	2.83796e-39	27.45
balf_cluster_gene_109751_1	553201.ROTMU0001_1603	gnl|BL_ORD_ID|9779677 553201.ROTMU0001_1603	657.907	0	97.9
balf_cluster_gene_205593_1	1007105.PT7_3468	gnl|BL_ORD_ID|6819460 1007105.PT7_3468	411.379	1.15905e-139	49.26	l-carnitine dehydratase bile acid-inducible protein F	C
balf_cluster_gene_056242_1	471853.Bcav_3775	gnl|BL_ORD_ID|9299619 471853.Bcav_3775	482.256	6.0332e-168	66.09	transporter activity	G
balf_cluster_gene_095237_1	553201.ROTMU0001_1597	gnl|BL_ORD_ID|9779671 553201.ROTMU0001_1597	671.003	0	96.78
balf_cluster_gene_005574_1	888742.HMPREF9123_2780	gnl|BL_ORD_ID|2199282 888742.HMPREF9123_2780	160.229	5.44547e-44	38.69
balf_cluster_gene_203343_1	360104.CCC13826_0810	gnl|BL_ORD_ID|692984 360104.CCC13826_0810	829.321	0	96.02	Uncharacterized protein conserved in bacteria (DUF2130)	S
balf_cluster_gene_010171_1	314225.ELI_12900	gnl|BL_ORD_ID|2110512 314225.ELI_12900	176.407	7.43641e-49	25.27	Histidine kinase	T
balf_cluster_gene_086122_1	411466.ACTODO_00007	gnl|BL_ORD_ID|1771259 411466.ACTODO_00007	692.189	0	82.86	Allows the formation of correctly charged Gln-tRNA(Gln) through the transamidation of misacylated Glu-tRNA(Gln) in organisms which lack glutaminyl-tRNA synthetase. The reaction takes place in the presence of glutamine and ATP through an activated gamma-phospho-Glu-tRNA(Gln) (By similarity)	J
balf_cluster_gene_081002_1	224911.bll3962	gnl|BL_ORD_ID|7502610 224911.bll3962	526.554	0	75.62	Major Facilitator superfamily	G
balf_cluster_gene_150155_1	1007104.SUS17_2304	gnl|BL_ORD_ID|1297779 1007104.SUS17_2304	488.804	1.58535e-171	65.3	Permease yjgp yjgq family	S
balf_cluster_gene_080194_1	509169.xccb100_2197	gnl|BL_ORD_ID|11440831 509169.xccb100_2197	172.17	1.6598e-48	34.77
balf_cluster_gene_116887_1	269482.Bcep1808_1303	gnl|BL_ORD_ID|9587096 269482.Bcep1808_1303	283.108	2.35754e-90	42.64	I protein	S
balf_cluster_gene_184293_1	706436.HMPREF9074_00442	gnl|BL_ORD_ID|4305374 706436.HMPREF9074_00442	734.561	0	99.72	ATPase activity	S
balf_cluster_gene_044311_1	391600.BBAL3_1497	gnl|BL_ORD_ID|6627310 391600.BBAL3_1497	494.967	2.45836e-175	75.46	Specifically methylates the N4 position of cytidine in position 1402 (C1402) of 16S rRNA (By similarity)	M
balf_cluster_gene_142363_1	411466.ACTODO_01052	gnl|BL_ORD_ID|1772415 411466.ACTODO_01052	454.907	5.6599e-158	75.94	Ligates lysine onto the cytidine present at position 34 of the AUA codon-specific tRNA(Ile) that contains the anticodon CAU, in an ATP-dependent manner. Cytidine is converted to lysidine, thus changing the amino acid specificity of the tRNA from methionine to isoleucine (By similarity)	D
balf_cluster_gene_101208_1	1037409.BJ6T_68290	gnl|BL_ORD_ID|8418922 1037409.BJ6T_68290	574.704	0	75.99	Monooxygenase	P
balf_cluster_gene_023969_1	596309.RHOER0001_0866	gnl|BL_ORD_ID|9822628 596309.RHOER0001_0866	657.522	0	98.49
balf_cluster_gene_233252_1	688246.Premu_0576	gnl|BL_ORD_ID|4074314 688246.Premu_0576	696.041	0	89.36	transposase	L
balf_cluster_gene_018230_1	441620.Mpop_5199	gnl|BL_ORD_ID|6961255 441620.Mpop_5199	747.273	0	96.65	Glutathionylspermidine synthase	E
balf_cluster_gene_150301_1	1037409.BJ6T_68640	gnl|BL_ORD_ID|8426056 1037409.BJ6T_68640	595.89	0	81.33	osmC family	O
balf_cluster_gene_200084_1	706433.HMPREF9430_01986	gnl|BL_ORD_ID|2354511 706433.HMPREF9430_01986	687.567	0	97.8	Transporter	S
balf_cluster_gene_095843_1	435832.HMPREF0604_01253	gnl|BL_ORD_ID|8433779 435832.HMPREF0604_01253	644.425	0	95.06	capsule polysaccharide	M
balf_cluster_gene_052040_1	441620.Mpop_4657	gnl|BL_ORD_ID|6960028 441620.Mpop_4657	656.366	0	98.52	Major Facilitator superfamily	G
balf_cluster_gene_224092_1	700598.Niako_6969	gnl|BL_ORD_ID|8360255 700598.Niako_6969	651.744	0	79.27	acyl-CoA dehydrogenase	I
balf_cluster_gene_136766_1	596309.RHOER0001_2199	gnl|BL_ORD_ID|9824748 596309.RHOER0001_2199	620.542	0	96.62
balf_cluster_gene_123840_1	944565.HMPREF9127_0174	gnl|BL_ORD_ID|4106321 944565.HMPREF9127_0174	520.776	0	65.1	Exonuclease-like protein	L
balf_cluster_gene_009015_1	450851.PHZ_c1186	gnl|BL_ORD_ID|7724988 450851.PHZ_c1186	421.394	6.73325e-145	57.33	Efflux transporter rnd family, mfp subunit	M
balf_cluster_gene_187223_1	658664.HMPREF1004_01161	gnl|BL_ORD_ID|14817209 658664.HMPREF1004_01161	737.643	0	86.49
balf_cluster_gene_156101_1	360104.CCC13826_2124	gnl|BL_ORD_ID|694758 360104.CCC13826_2124	832.017	0	99.76	ATP-dependent specificity component of the Clp protease. It directs the protease to specific substrates. Can perform chaperone functions in the absence of ClpP (By similarity)	O
balf_cluster_gene_074980_1	888056.HMPREF9062_0671	gnl|BL_ORD_ID|1730407 888056.HMPREF9062_0671	304.294	1.07144e-97	42.75	NA	S
balf_cluster_gene_152356_1	546263.NEIELOOT_01116	gnl|BL_ORD_ID|5508951 546263.NEIELOOT_01116	747.273	0	98.46	Major Facilitator	G
balf_cluster_gene_021133_1	411466.ACTODO_01050	gnl|BL_ORD_ID|1772413 411466.ACTODO_01050	535.798	0	71.46	D-alanyl-D-alanine carboxypeptidase	M
balf_cluster_gene_029534_1	633147.Olsu_0707	gnl|BL_ORD_ID|4323070 633147.Olsu_0707	330.872	3.45832e-104	46.43	domain protein	M
balf_cluster_gene_110024_1	553206.CORTU0001_2178	gnl|BL_ORD_ID|12647917 553206.CORTU0001_2178	118.242	5.87644e-29	15.03
balf_cluster_gene_182673_1	525260.HMPREF0276_0849	gnl|BL_ORD_ID|2136503 525260.HMPREF0276_0849	782.326	0	97.16	DNA gyrase negatively supercoils closed circular double- stranded DNA in an ATP-dependent manner and also catalyzes the interconversion of other topological isomers of double-stranded DNA rings, including catenanes and knotted rings (By similarity)	L
balf_cluster_gene_140486_1	521095.Apar_0953	gnl|BL_ORD_ID|5491152 521095.Apar_0953	850.892	0	97.84	Cleaves the N-terminal amino acid of tripeptides (By similarity)	E
balf_cluster_gene_127299_1	658664.HMPREF1004_01385	gnl|BL_ORD_ID|14817141 658664.HMPREF1004_01385	671.774	0	88.13
balf_cluster_gene_093041_1	1112856.MPNA4080	gnl|BL_ORD_ID|11597445 1112856.MPNA4080	696.812	0	99.71
balf_cluster_gene_121752_1	314266.SKA58_11655	gnl|BL_ORD_ID|8819757 314266.SKA58_11655	381.333	7.30657e-128	49.4	Glycosyl transferase (Group 1	M
balf_cluster_gene_208518_1	360104.CCC13826_0915	gnl|BL_ORD_ID|694012 360104.CCC13826_0915	813.142	0	99.5	Produces ATP from ADP in the presence of a proton gradient across the membrane. The alpha chain is a regulatory subunit (By similarity)	C
balf_cluster_gene_191968_1	1037409.BJ6T_49350	gnl|BL_ORD_ID|8424277 1037409.BJ6T_49350	799.66	0	96.14	threonine synthase	E
balf_cluster_gene_018110_1	553178.CAPGI0001_0645	gnl|BL_ORD_ID|9247773 553178.CAPGI0001_0645	839.336	0	99.51	peptidase'	O
balf_cluster_gene_136805_1	391600.BBAL3_1806	gnl|BL_ORD_ID|6626706 391600.BBAL3_1806	707.597	0	86.25	Catalyzes the 2-thiolation of uridine at the wobble position (U34) of tRNA, leading to the formation of s(2)U34 (By similarity)	J
balf_cluster_gene_020363_1	267608.RSc0016	gnl|BL_ORD_ID|2084256 267608.RSc0016	685.256	0	95.36	Dehydrogenase	E
balf_cluster_gene_195413_1	627192.SLG_25620	gnl|BL_ORD_ID|322867 627192.SLG_25620	375.17	8.83122e-125	52.47	sodium dicarboxylate symporter	C
balf_cluster_gene_224552_1	596309.RHOER0001_2017	gnl|BL_ORD_ID|9824562 596309.RHOER0001_2017	748.814	0	99.18
balf_cluster_gene_134158_1	888828.HMPREF9417_1369	gnl|BL_ORD_ID|10731564 888828.HMPREF9417_1369	695.271	0	97.92
balf_cluster_gene_193097_1	114615.BRADO3268	gnl|BL_ORD_ID|5755000 114615.BRADO3268	608.216	0	73.14	Major Facilitator superfamily	G
balf_cluster_gene_170895_1	546273.VEIDISOL_01609	gnl|BL_ORD_ID|4288315 546273.VEIDISOL_01609	703.745	0	99.71	Transfers and isomerizes the ribose moiety from AdoMet to the 7-aminomethyl group of 7-deazaguanine (preQ1-tRNA) to give epoxyqueuosine (oQ-tRNA) (By similarity)	J
balf_cluster_gene_073708_1	435832.HMPREF0604_01471	gnl|BL_ORD_ID|8433812 435832.HMPREF0604_01471	709.523	0	98.28	N-acetylglutamate semialdehyde dehydrogenase	E
balf_cluster_gene_113926_1	1003200.AXXA_27055	gnl|BL_ORD_ID|3457724 1003200.AXXA_27055	616.305	0	83.33	NA	S
balf_cluster_gene_072992_1	563038.HMPREF0851_01139	gnl|BL_ORD_ID|6314279 563038.HMPREF0851_01139	719.924	0	98.34	dihydrolipoyl dehydrogenase	C
balf_cluster_gene_217174_1	536019.Mesop_1521	gnl|BL_ORD_ID|9617656 536019.Mesop_1521	597.045	0	89.94	Pts system, glucitol sorbitol-specific	G
balf_cluster_gene_221139_1	411466.ACTODO_01295	gnl|BL_ORD_ID|1772108 411466.ACTODO_01295	545.043	0	83.38	Phosphopantothenoylcysteine decarboxylase	H
balf_cluster_gene_150588_1	585203.SMSK564_1170	gnl|BL_ORD_ID|12221420 585203.SMSK564_1170	660.988	0	95.29
balf_cluster_gene_025200_1	441620.Mpop_1006	gnl|BL_ORD_ID|6960651 441620.Mpop_1006	738.413	0	98.94	NDH-1 shuttles electrons from NADH, via FMN and iron- sulfur (Fe-S) centers, to quinones in the respiratory chain. The immediate electron acceptor for the enzyme in this species is believed to be ubiquinone. Couples the redox reaction to proton translocation (for every two electrons transferred, four hydrogen ions are translocated across the cytoplasmic membrane), and thus conserves the redox ene…	C
balf_cluster_gene_037180_1	428406.Rpic12D_3422	gnl|BL_ORD_ID|13822881 428406.Rpic12D_3422	681.789	0	87.38
balf_cluster_gene_127936_1	596309.RHOER0001_4046	gnl|BL_ORD_ID|9821006 596309.RHOER0001_4046	727.243	0	99.18
balf_cluster_gene_191310_1	234621.RER_09640	gnl|BL_ORD_ID|5198369 234621.RER_09640	712.605	0	100	MCE family	S
balf_cluster_gene_044862_1	596320.NEIFL0001_0510	gnl|BL_ORD_ID|891817 596320.NEIFL0001_0510	636.336	0	96.69
balf_cluster_gene_093548_1	224911.blr4129	gnl|BL_ORD_ID|7498411 224911.blr4129	382.874	5.4108e-129	51.33
balf_cluster_gene_219807_1	428406.Rpic12D_1333	gnl|BL_ORD_ID|13820817 428406.Rpic12D_1333	464.922	1.27502e-162	63.22
balf_cluster_gene_222704_1	546263.NEIELOOT_00784	gnl|BL_ORD_ID|5508390 546263.NEIELOOT_00784	707.212	0	97.76	Can catalyze the hydrolysis of ATP in the presence of single-stranded DNA, the ATP-dependent uptake of single-stranded DNA by duplex DNA, and the ATP-dependent hybridization of homologous single-stranded DNAs. It interacts with LexA causing its activation and leading to its autocatalytic cleavage (By similarity)	L
balf_cluster_gene_036168_1	562971.HMPREF0005_03481	gnl|BL_ORD_ID|13840624 562971.HMPREF0005_03481	741.11	0	99.73
balf_cluster_gene_177195_1	888746.HMPREF9180_0092	gnl|BL_ORD_ID|3703082 888746.HMPREF9180_0092	567	0	86.15	Single-stranded nucleic acid binding R3H domain-containing protein	S
balf_cluster_gene_102509_1	562971.HMPREF0005_03757	gnl|BL_ORD_ID|13839756 562971.HMPREF0005_03757	652.129	0	99.69
balf_cluster_gene_022159_1	997830.HMPREF1124_0147	gnl|BL_ORD_ID|4483784 997830.HMPREF1124_0147	813.142	0	95.68	dna polymerase iii subunits gamma and tau	L
balf_cluster_gene_152706_1	402626.Rpic_1015	gnl|BL_ORD_ID|5590883 402626.Rpic_1015	617.461	0	95.73	microcin transport	P
balf_cluster_gene_181112_1	384765.SIAM614_07268	gnl|BL_ORD_ID|8612537 384765.SIAM614_07268	632.098	0	77	Integrase catalytic subunit	L
balf_cluster_gene_029800_1	1005048.CFU_0996	gnl|BL_ORD_ID|9077410 1005048.CFU_0996	404.06	6.6065e-139	53.89	Major capsid protein	S
balf_cluster_gene_027399_1	323098.Nwi_0399	gnl|BL_ORD_ID|2694964 323098.Nwi_0399	295.819	2.53067e-95	42.55	Uncharacterized protein conserved in bacteria (DUF2336)	S
balf_cluster_gene_075177_1	983920.Y88_2414	gnl|BL_ORD_ID|19853 983920.Y88_2414	558.91	0	72.32	oxidoreductase activity, acting on diphenols and related substances as donors, oxygen as acceptor	C
balf_cluster_gene_212277_1	224911.blr3185	gnl|BL_ORD_ID|7499968 224911.blr3185	569.696	0	83.82	(ABC) transporter	E
balf_cluster_gene_007769_1	596309.RHOER0001_2607	gnl|BL_ORD_ID|9821515 596309.RHOER0001_2607	655.596	0	99.7
balf_cluster_gene_036592_1	1007104.SUS17_3363	gnl|BL_ORD_ID|1295895 1007104.SUS17_3363	654.44	0	80.33	Aspartokinase	E
balf_cluster_gene_225028_1	997353.HMPREF9144_1240	gnl|BL_ORD_ID|8557298 997353.HMPREF9144_1240	819.305	0	99.75	D-fructose-1,6-bisphosphate 1-phosphohydrolase class 3	G
balf_cluster_gene_224070_1	866778.HMPREF9684_1192	gnl|BL_ORD_ID|11625517 866778.HMPREF9684_1192	721.465	0	97.73
balf_cluster_gene_146143_1	649742.HMPREF0970_01635	gnl|BL_ORD_ID|14221283 649742.HMPREF0970_01635	473.011	4.90067e-166	69.08
balf_cluster_gene_054706_1	1048332.SALIVB_0487	gnl|BL_ORD_ID|11804558 1048332.SALIVB_0487	805.438	0	99.5
balf_cluster_gene_215935_1	679192.HMPREF9013_0830	gnl|BL_ORD_ID|6352187 679192.HMPREF9013_0830	472.626	5.58419e-164	66.95	ABC transporter (permease)	V
balf_cluster_gene_123938_1	469599.FSAG_00196	gnl|BL_ORD_ID|13993542 469599.FSAG_00196	657.136	0	99.07
balf_cluster_gene_048331_1	862512.HMPREF0277_0222	gnl|BL_ORD_ID|10365382 862512.HMPREF0277_0222	867.07	0	99.76
balf_cluster_gene_043215_1	888828.HMPREF9417_1449	gnl|BL_ORD_ID|10731644 888828.HMPREF9417_1449	765.377	0	96.22
balf_cluster_gene_177562_1	562983.HMPREF0433_00280	gnl|BL_ORD_ID|8446420 562983.HMPREF0433_00280	778.089	0	99.23
balf_cluster_gene_098835_1	314345.SPV1_07411	gnl|BL_ORD_ID|2597974 314345.SPV1_07411	256.529	9.08659e-81	41.52	NA	S
balf_cluster_gene_191197_1	649742.HMPREF0970_00196	gnl|BL_ORD_ID|14220799 649742.HMPREF0970_00196	328.946	3.96545e-109	56.52
balf_cluster_gene_047585_1	562973.HMPREF0059_01251	gnl|BL_ORD_ID|12554198 562973.HMPREF0059_01251	838.18	0	99.76
balf_cluster_gene_232537_1	553201.ROTMU0001_0205	gnl|BL_ORD_ID|9779914 553201.ROTMU0001_0205	872.848	0	99.28
balf_cluster_gene_113570_1	658664.HMPREF1004_00051	gnl|BL_ORD_ID|14820078 658664.HMPREF1004_00051	727.628	0	98.66
balf_cluster_gene_196055_1	706433.HMPREF9430_01420	gnl|BL_ORD_ID|2354284 706433.HMPREF9430_01420	738.799	0	97.8	(ABC) transporter	G
balf_cluster_gene_184175_1	234621.RER_31180	gnl|BL_ORD_ID|5194143 234621.RER_31180	641.343	0	94.59	udp-glucose 4-epimerase	M
balf_cluster_gene_168259_1	649742.HMPREF0970_00180	gnl|BL_ORD_ID|14220784 649742.HMPREF0970_00180	642.499	0	86.97
balf_cluster_gene_230934_1	627192.SLG_26580	gnl|BL_ORD_ID|322409 627192.SLG_26580	488.804	9.70177e-172	65.1	radical SAM domain protein	S
balf_cluster_gene_175231_1	997353.HMPREF9144_0190	gnl|BL_ORD_ID|8557154 997353.HMPREF9144_0190	711.064	0	99.44
balf_cluster_gene_103277_1	1003200.AXXA_10440	gnl|BL_ORD_ID|3462055 1003200.AXXA_10440	649.818	0	96.69	(ABC) transporter	E:P
balf_cluster_gene_064474_1	649742.HMPREF0970_01123	gnl|BL_ORD_ID|14221463 649742.HMPREF0970_01123	189.119	1.58801e-51	37.99
balf_cluster_gene_013252_1	596309.RHOER0001_0047	gnl|BL_ORD_ID|9819811 596309.RHOER0001_0047	668.692	0	98.53
balf_cluster_gene_212278_1	743721.Psesu_1973	gnl|BL_ORD_ID|612143 743721.Psesu_1973	191.815	2.83564e-56	35.47	gumn family	S
balf_cluster_gene_076578_1	391603.FBALC1_16187	gnl|BL_ORD_ID|6864652 391603.FBALC1_16187	130.954	9.74693e-32	29.31	NA	S
balf_cluster_gene_121548_1	1037409.BJ6T_53000	gnl|BL_ORD_ID|8425051 1037409.BJ6T_53000	95.9005	8.52173e-20	19.82	NA	S
balf_cluster_gene_222400_1	234621.RER_01700	gnl|BL_ORD_ID|5196794 234621.RER_01700	576.244	0	93.87	NA	S
balf_cluster_gene_047787_1	552811.Dehly_0949	gnl|BL_ORD_ID|8929538 552811.Dehly_0949	223.402	1.22408e-67	37.69	DNA polymerase processivity factor activity	L
balf_cluster_gene_099169_1	441620.Mpop_4717	gnl|BL_ORD_ID|6957844 441620.Mpop_4717	793.112	0	93.76	aminotransferase	E
balf_cluster_gene_143442_1	316057.RPD_0040	gnl|BL_ORD_ID|4407397 316057.RPD_0040	464.537	2.71592e-160	56.56	acetyl-coa acetyltransferase	I
balf_cluster_gene_050929_1	428406.Rpic12D_1581	gnl|BL_ORD_ID|13821060 428406.Rpic12D_1581	791.956	0	98.99
balf_cluster_gene_228205_1	553178.CAPGI0001_1532	gnl|BL_ORD_ID|9248444 553178.CAPGI0001_1532	741.495	0	89.26	Catalyzes the 1,3-allylic rearrangement of the homoallylic substrate isopentenyl (IPP) to its allylic isomer, dimethylallyl diphosphate (DMAPP) (By similarity)	C
balf_cluster_gene_089005_1	562971.HMPREF0005_02691	gnl|BL_ORD_ID|13842661 562971.HMPREF0005_02691	656.366	0	98.48
balf_cluster_gene_110398_1	546273.VEIDISOL_00979	gnl|BL_ORD_ID|4289202 546273.VEIDISOL_00979	769.615	0	100	Catalyzes the attachment of tyrosine to tRNA(Tyr) in a two-step reaction tyrosine is first activated by ATP to form Tyr- AMP and then transferred to the acceptor end of tRNA(Tyr) (By similarity)	J
balf_cluster_gene_109148_1	234621.RER_12350	gnl|BL_ORD_ID|5197460 234621.RER_12350	729.169	0	93.36	major facilitator superfamily	G
balf_cluster_gene_179524_1	680646.RMDY18_10030	gnl|BL_ORD_ID|6600047 680646.RMDY18_10030	706.827	0	99.15	Catalyzes the transfer of the 2-phospholactate moiety from lactyl (2) diphospho-(5')guanosine (LPPG) to 7,8-didemethyl- 8-hydroxy-5-deazariboflavin (FO) with the formation of the L- lactyl phosphodiester of 7,8-didemethyl-8-hydroxy-5- deazariboflavin (F420-0) and GMP (By similarity)	S
balf_cluster_gene_071412_1	706433.HMPREF9430_00676	gnl|BL_ORD_ID|2354470 706433.HMPREF9430_00676	671.774	0	89.37	cation diffusion facilitator family transporter	P
balf_cluster_gene_026736_1	279238.Saro_0228	gnl|BL_ORD_ID|3557556 279238.Saro_0228	692.189	0	90.58	Histidine kinase	T
balf_cluster_gene_002391_1	314264.ROS217_00495	gnl|BL_ORD_ID|7476281 314264.ROS217_00495	477.248	3.79208e-166	54.77	acyl-CoA dehydrogenase	I
balf_cluster_gene_070371_1	649742.HMPREF0970_01584	gnl|BL_ORD_ID|14220191 649742.HMPREF0970_01584	649.818	0	97.55
balf_cluster_gene_209639_1	228405.HNE_1254	gnl|BL_ORD_ID|7263788 228405.HNE_1254	329.331	3.28304e-107	43.78	major facilitator Superfamily	G
balf_cluster_gene_224415_1	293826.Amet_2543	gnl|BL_ORD_ID|9329391 293826.Amet_2543	262.307	4.81315e-80	42.33	This protein is involved in the repair of mismatches in DNA. It is required for dam-dependent methyl-directed DNA mismatch repair. May act as a molecular matchmaker , a protein that promotes the formation of a stable complex between two or more DNA-binding proteins in an ATP-dependent manner without itself being part of a final effector complex (By similarity)	L
balf_cluster_gene_087308_1	1007104.SUS17_350	gnl|BL_ORD_ID|1295369 1007104.SUS17_350	379.407	3.15341e-127	58.31	pseudouridine synthase activity	J
balf_cluster_gene_040275_1	441620.Mpop_4710	gnl|BL_ORD_ID|6957837 441620.Mpop_4710	687.952	0	98.33	Part of the ABC transporter complex PotABCD involved in spermidine putrescine import. Responsible for energy coupling to the transport system (By similarity)	E
balf_cluster_gene_204151_1	360105.CCV52592_0985	gnl|BL_ORD_ID|2687686 360105.CCV52592_0985	738.413	0	89.02	cell wall formation (By similarity)	M
balf_cluster_gene_078497_1	553201.ROTMU0001_0981	gnl|BL_ORD_ID|9779607 553201.ROTMU0001_0981	593.193	0	94.81
balf_cluster_gene_018841_1	596315.HMPREF0634_1590	gnl|BL_ORD_ID|5781018 596315.HMPREF0634_1590	731.48	0	99.46	Mate efflux family protein	V
balf_cluster_gene_217985_1	889204.HMPREF9423_1822	gnl|BL_ORD_ID|11220654 889204.HMPREF9423_1822	189.119	6.77302e-55	38.74
balf_cluster_gene_169570_1	224911.blr2392	gnl|BL_ORD_ID|7497115 224911.blr2392	499.204	7.39456e-177	73.11	Is involved in NO detoxification in an aerobic process, termed nitric oxide dioxygenase (NOD) reaction that utilizes O(2) and NAD(P)H to convert NO to nitrate, which protects the bacterium from various noxious nitrogen compounds. Therefore, plays a central role in the inducible response to nitrosative stress (By similarity)	C
balf_cluster_gene_085381_1	224911.blr7474	gnl|BL_ORD_ID|7496327 224911.blr7474	494.967	2.28297e-175	74.09	Methylates the class 1 translation termination release factors RF1 PrfA and RF2 PrfB on the glutamine residue of the universally conserved GGQ motif (By similarity)	J
balf_cluster_gene_008444_1	224911.bll2645	gnl|BL_ORD_ID|7497636 224911.bll2645	607.446	0	79.32	Methyltransferase, type	S
balf_cluster_gene_047508_1	471872.STRINF_00939	gnl|BL_ORD_ID|13431155 471872.STRINF_00939	154.836	6.00529e-39	43.15
balf_cluster_gene_051918_1	637911.AM305_11390	gnl|BL_ORD_ID|6698977 637911.AM305_11390	695.656	0	87.4	ATP-binding protein	D
balf_cluster_gene_179859_1	944560.HMPREF9058_1172	gnl|BL_ORD_ID|6433735 944560.HMPREF9058_1172	159.073	1.26843e-42	29.46	Relaxase mobilization nuclease	S
balf_cluster_gene_207532_1	1031711.RSPO_c01350	gnl|BL_ORD_ID|3251798 1031711.RSPO_c01350	608.601	0	82.88	Catalyzes the hydrolysis of the pyrophosphate bond of UDP-2,3-diacylglucosamine to yield 2,3-diacylglucosamine 1- phosphate (lipid X) and UMP (By similarity)	S
balf_cluster_gene_074133_1	862512.HMPREF0277_1659	gnl|BL_ORD_ID|10364776 862512.HMPREF0277_1659	696.812	0	100
balf_cluster_gene_028973_1	513049.AmaxDRAFT_1360	gnl|BL_ORD_ID|4554732 513049.AmaxDRAFT_1360	132.494	2.26519e-31	21.43	Histidine kinase	T
balf_cluster_gene_130362_1	562971.HMPREF0005_00251	gnl|BL_ORD_ID|13841506 562971.HMPREF0005_00251	697.197	0	99.42
balf_cluster_gene_052507_1	888048.HMPREF8577_0243	gnl|BL_ORD_ID|4165249 888048.HMPREF8577_0243	655.981	0	97.83	thioredoxin reductase	O
balf_cluster_gene_045941_1	768066.HELO_3297	gnl|BL_ORD_ID|1038352 768066.HELO_3297	243.817	8.0923e-76	35.91	relaxase mobilization nuclease domain protein	U
balf_cluster_gene_161568_1	553218.CAMRE0001_0275	gnl|BL_ORD_ID|3463102 553218.CAMRE0001_0275	809.675	0	98.72	Provides the precursors necessary for DNA synthesis. Catalyzes the biosynthesis of deoxyribonucleotides from the corresponding ribonucleotides (By similarity)	F
balf_cluster_gene_126349_1	562971.HMPREF0005_01903	gnl|BL_ORD_ID|13841250 562971.HMPREF0005_01903	787.334	0	99.75
balf_cluster_gene_106411_1	596315.HMPREF0634_1496	gnl|BL_ORD_ID|5780624 596315.HMPREF0634_1496	831.632	0	99.07	Involved in protein export. Acts as a chaperone by maintaining the newly synthesized protein in an open conformation	O
balf_cluster_gene_107854_1	443144.GM21_1633	gnl|BL_ORD_ID|541433 443144.GM21_1633	299.671	7.3775e-96	35.7	Type ii secretion system	U
balf_cluster_gene_092067_1	596309.RHOER0001_1096	gnl|BL_ORD_ID|9822857 596309.RHOER0001_1096	746.117	0	99.21
balf_cluster_gene_044726_1	888056.HMPREF9062_0564	gnl|BL_ORD_ID|1729634 888056.HMPREF9062_0564	508.449	7.9426e-179	66.49	Part of the ABC transporter complex PotABCD involved in spermidine putrescine import. Responsible for energy coupling to the transport system (By similarity)	E
balf_cluster_gene_005339_1	888833.HMPREF9421_1772	gnl|BL_ORD_ID|5955708 888833.HMPREF9421_1772	837.025	0	99.51	Arginine dihydrolase	E
balf_cluster_gene_026459_1	553178.CAPGI0001_1330	gnl|BL_ORD_ID|9248549 553178.CAPGI0001_1330	701.049	0	96.94	Outer membrane efflux protein	M
balf_cluster_gene_198469_1	563045.CTS44_01410	gnl|BL_ORD_ID|12463605 563045.CTS44_01410	561.222	0	65.4
balf_cluster_gene_065243_1	411466.ACTODO_00412	gnl|BL_ORD_ID|1772061 411466.ACTODO_00412	624.78	0	89.8
balf_cluster_gene_059108_1	288000.BBta_3421	gnl|BL_ORD_ID|9069844 288000.BBta_3421	534.643	0	78.43	high-affinity nickel-transporter	P
balf_cluster_gene_145247_1	521096.Tpau_3043	gnl|BL_ORD_ID|7586631 521096.Tpau_3043	619.387	0	72.03	acyl-CoA dehydrogenase	I
balf_cluster_gene_232180_1	562971.HMPREF0005_00411	gnl|BL_ORD_ID|13841666 562971.HMPREF0005_00411	653.284	0	82.95
balf_cluster_gene_185115_1	428406.Rpic12D_2580	gnl|BL_ORD_ID|13822046 428406.Rpic12D_2580	778.859	0	99.48
balf_cluster_gene_083608_1	749219.MCR_1331	gnl|BL_ORD_ID|12939989 749219.MCR_1331	736.487	0	99.72
balf_cluster_gene_126571_1	596315.HMPREF0634_1460	gnl|BL_ORD_ID|5779639 596315.HMPREF0634_1460	802.357	0	96.28	Cell wall binding repeat 2-containing protein	M
balf_cluster_gene_147986_1	983920.Y88_0464	gnl|BL_ORD_ID|19676 983920.Y88_0464	211.846	6.00206e-64	36.02	(LipO)protein	M
balf_cluster_gene_043228_1	521095.Apar_0463	gnl|BL_ORD_ID|5490922 521095.Apar_0463	759.985	0	86.84	peptidase M24	E
balf_cluster_gene_188471_1	658086.HMPREF0994_01927	gnl|BL_ORD_ID|729137 658086.HMPREF0994_01927	421.779	1.05515e-143	48.07	CBS Domain protein	P
balf_cluster_gene_033972_1	319795.Dgeo_2013	gnl|BL_ORD_ID|9556007 319795.Dgeo_2013	552.747	0	83.94	Toxin-antitoxin system, toxin component, Fic family	S
balf_cluster_gene_043068_1	709797.CSIRO_1683	gnl|BL_ORD_ID|7182607 709797.CSIRO_1683	783.867	0	96.66	acyl-CoA dehydrogenase	I
balf_cluster_gene_081988_1	531844.FIC_02378	gnl|BL_ORD_ID|4796385 531844.FIC_02378	495.738	7.64701e-173	60.86	endonuclease exonuclease phosphatase	S
balf_cluster_gene_034546_1	879309.HMPREF9199_0629	gnl|BL_ORD_ID|1835090 879309.HMPREF9199_0629	681.789	0	99.41	(ABC) transporter	E
balf_cluster_gene_105452_1	546273.VEIDISOL_01971	gnl|BL_ORD_ID|4289191 546273.VEIDISOL_01971	1211.82	0	96.69	NA	S
balf_cluster_gene_129950_1	562971.HMPREF0005_04483	gnl|BL_ORD_ID|13843202 562971.HMPREF0005_04483	667.922	0	99.4
balf_cluster_gene_059452_1	1007104.SUS17_2931	gnl|BL_ORD_ID|1298108 1007104.SUS17_2931	528.865	0	77.08	Catalyzes the conversion of epoxyqueuosine (oQ) to queuosine (Q), which is a hypermodified base found in the wobble positions of tRNA(Asp), tRNA(Asn), tRNA(His) and tRNA(Tyr) (By similarity)	C
balf_cluster_gene_195030_1	765698.Mesci_3147	gnl|BL_ORD_ID|2841460 765698.Mesci_3147	661.759	0	91.69	phospho-N-acetylmuramoyl-pentapeptide-transferase activity	M
balf_cluster_gene_204942_1	742820.HMPREF9459_01089	gnl|BL_ORD_ID|10905321 742820.HMPREF9459_01089	790.03	0	99.49
balf_cluster_gene_120195_1	269483.Bcep18194_B0590	gnl|BL_ORD_ID|10095113 269483.Bcep18194_B0590	313.153	1.29516e-100	44.05
balf_cluster_gene_036655_1	450749.HMPREF0874_00079	gnl|BL_ORD_ID|12294272 450749.HMPREF0874_00079	681.404	0	83.95
balf_cluster_gene_208311_1	633149.Bresu_0423	gnl|BL_ORD_ID|7577935 633149.Bresu_0423	483.411	2.34886e-170	79.65	pfkb domain protein	G
balf_cluster_gene_148932_1	402626.Rpic_1928	gnl|BL_ORD_ID|5589646 402626.Rpic_1928	702.205	0	95.36	Catalyzes the conversion of dihydroorotate to orotate	F
balf_cluster_gene_138649_1	862965.PARA_04750	gnl|BL_ORD_ID|3062437 862965.PARA_04750	817.379	0	97.81	peptidase	D
balf_cluster_gene_022597_1	562971.HMPREF0005_02081	gnl|BL_ORD_ID|13844044 562971.HMPREF0005_02081	744.191	0	98.11
balf_cluster_gene_032958_1	536019.Mesop_2700	gnl|BL_ORD_ID|9617840 536019.Mesop_2700	636.721	0	76.56	FAD linked oxidase domain protein	C
balf_cluster_gene_184507_1	546264.NEIFLAOT_01009	gnl|BL_ORD_ID|4570626 546264.NEIFLAOT_01009	725.702	0	96.95	heptosyltransferase	M
balf_cluster_gene_063032_1	314266.SKA58_14932	gnl|BL_ORD_ID|8816763 314266.SKA58_14932	332.798	3.76927e-109	55.31	n-acetylmuramoyl-l-alanine amidase	M
balf_cluster_gene_003239_1	391600.BBAL3_3286	gnl|BL_ORD_ID|6626225 391600.BBAL3_3286	554.673	0	67.73	Membrane-associated zinc metalloprotease	M
balf_cluster_gene_202596_1	889204.HMPREF9423_1506	gnl|BL_ORD_ID|11219670 889204.HMPREF9423_1506	788.104	0	98.46
balf_cluster_gene_054112_1	862965.PARA_14720	gnl|BL_ORD_ID|3063184 862965.PARA_14720	678.707	0	98.78	homoserine O-acetyltransferase	E
balf_cluster_gene_017799_1	489653.NLA_18430	gnl|BL_ORD_ID|7350659 489653.NLA_18430	777.319	0	97.12	Reduction of activated sulfate into sulfite (By similarity)	P
balf_cluster_gene_054816_1	114615.BRADO2575	gnl|BL_ORD_ID|5754007 114615.BRADO2575	836.254	0	92.94	acyl-CoA dehydrogenase	I
balf_cluster_gene_187024_1	224911.bll0504	gnl|BL_ORD_ID|7497089 224911.bll0504	682.174	0	89.49	3-isopropylmalate dehydrogenase activity	E
[truncated: 179,596 more rows]
